# Supplementary material for: Tumor Derived SIGLEC Family Genes May Play Roles in Tumor Genesis, Progression, and Immune Microenvironment Regulation
Source: Front Oncol. 2020 Nov 9;10:586820. doi: 10.3389/fonc.2020.586820 (PMC7681003; doi:10.3389/fonc.2020.586820)
Supplement: Supplementary file 1 [file Table_1.xlsx]

## Sheet: B cell
Coefficients																			Adj.P
	cancer	B cell memory_CIBERSORT	B cell memory_CIBERSORT-ABS	B cell memory_XCELL	B cell naive_CIBERSORT	B cell naive_CIBERSORT-ABS	B cell naive_XCELL	B cell plasma_CIBERSORT	B cell plasma_CIBERSORT-ABS	B cell plasma_XCELL	B cell_EPIC	B cell_MCPCOUNTER	B cell_QUANTISEQ	B cell_TIMER	B cell_XCELL	Class-switched memory B cell_XCELL				cancer	B cell memory_CIBERSORT	B cell memory_CIBERSORT-ABS	B cell memory_XCELL	B cell naive_CIBERSORT	B cell naive_CIBERSORT-ABS	B cell naive_XCELL	B cell plasma_CIBERSORT	B cell plasma_CIBERSORT-ABS	B cell plasma_XCELL	B cell_EPIC	B cell_MCPCOUNTER	B cell_QUANTISEQ	B cell_TIMER	B cell_XCELL	Class-switched memory B cell_XCELL
	ACC (n=79)	0.0645227	0.0643506	0.0465088	-0.268024	-0.133492	0.238451	-0.287837	-0.103619	-0.0662537	-0.0727534	0.0891636	-0.237131	0.175995	0.0450376	-0.0843405				ACC (n=79)	0.693578	0.693578	0.780562	0.0463704	0.374389	0.0803763	0.0307646	0.497058	0.68597	0.658107	0.566447	0.0818579	0.213653	0.788537	0.596327
	BLCA (n=408)	-0.0224059	0.0425935	0.283207	-0.033988	0.055705	0.12834	-0.401437	-0.043823	0.090422	0.153869	0.243729	0.242734	0.0330794	0.404201	0.114784				BLCA (n=408)	0.759491	0.527871	2.46059e-07	0.63407	0.399787	0.0308918	2.76936e-14	0.516373	0.140671	0.00864449	1.25175e-05	1.36787e-05	0.64531	1.76496e-14	0.0572772
	BRCA (n=1100)	0.0930581	0.112895	0.218586	-0.210182	-0.00640429	0.216032	-0.352126	-0.15173	0.158252	0.13328	0.209517	0.228586	0.00893793	0.408705	0.23141				BRCA (n=1100)	0.0092605	0.00123451	4.30828e-11	2.14858e-10	0.884402	6.85203e-11	6.52939e-28	8.81937e-06	3.21929e-06	0.000116799	2.4509e-10	4.73262e-12	0.837149	1.57673e-38	2.49991e-12
	BRCA-Basal (n=191)	0.131213	0.164874	0.308232	-0.0671115	0.0852168	0.271908	-0.308228	-0.0818794	0.091153	0.245225	0.166496	0.301109	-0.0095983	0.341632	0.281594				BRCA-Basal (n=191)	0.142215	0.0598786	0.000155917	0.494254	0.377411	0.00100233	0.000155917	0.396428	0.343978	0.00350136	0.0579573	0.00022522	0.924626	2.1399e-05	0.000615119
	BRCA-Her2 (n=82)	0.215888	0.23467	0.273218	-0.261584	-0.00336987	0.17165	-0.302992	-0.0621506	0.108541	0.288165	0.387264	0.457399	0.0419982	0.440177	0.270641				BRCA-Her2 (n=82)	0.117857	0.0880133	0.0433415	0.0549099	0.984148	0.232192	0.0229348	0.709214	0.480143	0.0315696	0.00250793	0.000224905	0.799404	0.000414719	0.0457114
	BRCA-LumA (n=568)	0.0726614	0.086826	0.0998734	-0.239677	-0.0272896	0.12776	-0.39666	-0.216882	0.0740104	0.0343858	0.145522	0.174013	-0.0145358	0.30303	0.132351				BRCA-LumA (n=568)	0.161209	0.0892208	0.0487216	2.55256e-07	0.654796	0.00999781	4.19349e-19	3.83804e-06	0.152445	0.549826	0.0029039	0.000280507	0.813461	2.68816e-11	0.00744027
	BRCA-LumB (n=219)	-0.0301084	-0.0178474	0.259719	-0.172839	0.0115155	0.2194	-0.168282	0.0414102	0.112224	0.0572075	0.168344	0.117381	-0.0777995	0.355183	0.132434				BRCA-LumB (n=219)	0.768069	0.861936	0.000981678	0.0364271	0.905742	0.00649888	0.0422291	0.679455	0.191362	0.5451	0.0422291	0.169679	0.396429	2.71497e-06	0.115652
	CESC (n=306)	0.128588	0.153361	0.313507	-0.128119	-0.0627631	0.321148	-0.237444	-0.065294	0.202646	0.184237	0.23515	0.240697	0.225821	0.554431	0.389284				CESC (n=306)	0.0637529	0.0246217	6.80481e-07	0.0645932	0.41188	3.36297e-07	0.000268309	0.394571	0.00224439	0.00614202	0.000308559	0.00021869	0.000560304	1.00343e-21	1.86167e-10
	CHOL (n=36)	0.0897309	0.159229	0.365893	-0.328026	-0.134855	0.0475285	0.0892775	0.166284	0.195574	0.383214	0.348942	0.201601	0.468933	0.492437	0.0903722				CHOL (n=36)	0.710718	0.476961	0.061295	0.0974067	0.553324	0.843967	0.71073	0.451975	0.374389	0.0487216	0.0769879	0.359272	0.0123399	0.00762307	0.709748
	COAD (n=458)	0.155332	0.175481	0.134649	-0.141854	0.12944	0.034658	-0.212924	0.0917816	-0.013261	0.385379	0.465799	0.427333	-0.160295	0.298016	0.166962				COAD (n=458)	0.0231669	0.00973985	0.0534253	0.0404204	0.0631513	0.67919	0.00126352	0.203053	0.874831	3.40191e-10	8.83777e-15	2.15873e-12	0.0190261	2.93493e-06	0.0148896
	DLBC (n=48)	-0.519579	-0.228812	-0.302488	0.0296501	0.0499224	-0.270893	0.065697	0.0979205	-0.399265	-0.29085	-0.309051	-0.154104	-0.540019	-0.282191	0.0987931				DLBC (n=48)	0.00164494	0.232802	0.0974496	0.892679	0.82138	0.144936	0.770528	0.658878	0.0229348	0.113143	0.0901539	0.44929	0.000963826	0.125521	0.657154
	ESCA (n=185)	0.125846	0.145523	0.0176476	-0.147765	0.0128319	0.199104	-0.29748	-0.0965095	-0.0855613	0.137659	0.158986	0.139149	0.199146	0.313947	0.22123				ESCA (n=185)	0.152445	0.0929441	0.867605	0.0884342	0.898701	0.018431	0.000214397	0.296943	0.3682	0.113336	0.0645932	0.109597	0.018431	8.51054e-05	0.00807679
	GBM (n=153)	-0.254046	-0.222734	0.0730981	0.186078	0.238879	0.0879672	0.00397683	0.0952344	-0.231257	0.0265161	0.307482	0.142965	0.495958	0.328667	0.339086				GBM (n=153)	0.00782605	0.0213233	0.510894	0.0598786	0.0134607	0.420132	0.972943	0.382358	0.0168643	0.82138	0.000929693	0.156285	6.13619e-09	0.000343274	0.000214903
	HNSC (n=522)	0.00465275	0.04595	0.155267	0.0891077	0.144621	0.187309	-0.389394	-0.0817861	-0.0191818	0.169113	0.270409	0.30351	-0.236799	0.376496	0.242085				HNSC (n=522)	0.938341	0.421465	0.00178639	0.0890252	0.00401179	0.000132254	1.16717e-17	0.119637	0.761344	0.000607654	9.15409e-09	6.92207e-11	7.27681e-07	1.92848e-16	3.91436e-07
	HNSC-HPV- (n=422)	0.00480776	0.0411201	0.136623	0.0880498	0.138732	0.208591	-0.432948	-0.132431	-0.102892	0.160131	0.28821	0.315331	-0.25915	0.407902	0.256492				HNSC-HPV- (n=422)	0.941801	0.524988	0.0161864	0.13321	0.0147847	0.000121371	4.84973e-18	0.0195941	0.0768379	0.00403682	3.37128e-08	1.002e-09	9.76888e-07	6.04003e-16	1.30663e-06
	HNSC-HPV+ (n=98)	-0.0541314	0.00233681	0.201593	0.0212002	0.11527	0.0549781	-0.126765	0.103122	0.287672	0.197027	0.169779	0.230541	-0.123998	0.290249	0.180466				HNSC-HPV+ (n=98)	0.713018	0.985624	0.10295	0.884972	0.396354	0.710718	0.349513	0.44929	0.0162032	0.112009	0.179408	0.0598786	0.360548	0.0153849	0.150125
	KICH (n=66)	0.113273	0.113273	0.224904	-0.251901	0.139157	0.0194524	-0.310433	0.0270085	-0.262035	-0.0132367	0.267372	0.085987	0.293174	0.289548	-0.128204				KICH (n=66)	0.483361	0.483361	0.122166	0.0812813	0.382358	0.908034	0.0271247	0.877698	0.0679202	0.938341	0.0622856	0.614669	0.0387976	0.0418286	0.421465
	KIRC (n=533)	0.0559389	0.0648755	0.0496469	-0.091365	0.0103664	0.236115	-0.235131	0.123179	0.00761744	0.0927222	0.404709	0.381026	-0.125471	0.308353	0.310977				KIRC (n=533)	0.34337	0.249001	0.400166	0.0908022	0.874831	1.90434e-06	2.11692e-06	0.0197682	0.903561	0.0874174	5.7874e-18	7.06255e-16	0.0176215	1.34834e-10	9.33643e-11
	KIRP (n=290)	0.123735	0.203091	0.389397	0.0346383	0.136233	0.452415	-0.4033	-0.163354	-0.0560023	0.0137858	0.357234	0.176312	0.487702	0.590258	-0.0227327				KIRP (n=290)	0.0880133	0.00328926	8.35973e-10	0.686023	0.0587381	3.99313e-13	1.67037e-10	0.0206481	0.484084	0.874831	2.80064e-08	0.0123399	2.41009e-15	1.55469e-23	0.795883
	LGG (n=516)	0.0313801	0.0429622	0.0361304	-0.115332	0.000826308	-0.0226589	-0.410281	-0.296659	-0.120748	-0.350765	0.0494226	-0.0928963	-0.103776	0.2192	0.0399433				LGG (n=516)	0.613287	0.462772	0.5451	0.0268259	0.985624	0.718932	4.69732e-19	3.40191e-10	0.0199789	6.37448e-14	0.396354	0.0804074	0.0488071	7.64059e-06	0.497058
	LIHC (n=371)	0.00644934	0.0238209	0.118015	-0.219659	-0.0172469	0.0373081	-0.0605741	0.0552442	0.0166998	0.0485327	0.396154	0.31589	0.267492	0.384885	0.213386				LIHC (n=371)	0.928197	0.752027	0.0583519	0.000169168	0.819201	0.609658	0.375842	0.420132	0.82138	0.483361	3.99313e-13	1.61743e-08	2.87042e-06	2.15873e-12	0.000265645
	LUAD (n=515)	0.0461446	0.116152	0.00809616	-0.0635201	0.0467501	0.135227	-0.475957	-0.239358	-0.306045	0.0394888	0.106909	0.193663	-0.0202309	0.202119	0.183762				LUAD (n=515)	0.420132	0.0231669	0.894985	0.243469	0.414103	0.00756714	6.14907e-27	5.33517e-07	4.71721e-11	0.496689	0.0384745	7.20988e-05	0.747518	3.17884e-05	0.00017466
	LUSC (n=501)	0.0378836	0.0888948	0.203998	0.0582277	0.179755	0.212448	-0.311469	0.00434844	0.0158311	0.281945	0.328504	0.304098	0.0271924	0.362724	0.316783				LUSC (n=501)	0.522228	0.0946094	3.66645e-05	0.306419	0.000309285	1.56903e-05	4.48329e-11	0.941801	0.802408	3.15469e-09	2.9585e-12	1.21739e-10	0.669383	8.00966e-15	2.05329e-11
	MESO (n=87)	0.00529968	0.0217582	-0.0846775	-0.209033	-0.171977	0.174845	-0.153785	-0.0309526	0.178711	-0.0148281	-0.00206974	0.00230969	0.0648228	0.222545	0.262868				MESO (n=87)	0.972943	0.884972	0.55355	0.0976876	0.184354	0.176601	0.244214	0.837149	0.165444	0.92047	0.985624	0.985624	0.669383	0.0779137	0.0334667
	OV (n=303)	0.0898743	0.119538	0.122543	-0.13023	-0.00805607	-0.0035804	-0.241157	0.0355556	0.0249239	0.160878	0.0425715	0.221763	0.022508	0.418553	0.200793				OV (n=303)	0.242132	0.105224	0.09631	0.0769879	0.924626	0.968079	0.000455549	0.68597	0.780562	0.0255032	0.620567	0.00139981	0.798273	6.67836e-11	0.00438633
	PAAD (n=179)	0.0277558	0.0892981	0.244939	0.11135	0.203906	0.208342	-0.243628	0.0221623	-0.140417	0.192231	0.299558	0.233995	-0.0454913	0.318496	0.249907				PAAD (n=179)	0.796943	0.359272	0.00388441	0.229218	0.0186037	0.0162032	0.00404914	0.834778	0.115652	0.0270668	0.000279046	0.00614185	0.669383	0.000103899	0.00312496
	PCPG (n=181)	0.227955	0.235962	0.144854	-0.2826	-0.143695	0.122063	-0.296092	0.130413	-0.0451088	0.17888	0.52294	0.209303	0.328485	0.12111	0.131388				PCPG (n=181)	0.00858704	0.00626807	0.108738	0.000783129	0.111842	0.184745	0.000393423	0.152445	0.675228	0.0442521	6.4286e-12	0.0169416	7.14399e-05	0.188392	0.150125
	PRAD (n=498)	0.244016	0.25893	0.221339	-0.130771	0.134638	0.0889317	-0.356676	-0.0495137	-0.0418133	0.32573	0.376206	0.444741	-0.0696423	0.266749	0.0840889				PRAD (n=498)	2.90446e-06	5.97664e-07	2.72448e-05	0.0187687	0.0156395	0.119637	1.15122e-12	0.426819	0.510742	1.04402e-10	4.70841e-14	1.00727e-19	0.240967	2.47577e-07	0.144936
	READ (n=166)	-0.139378	-0.106971	-0.125666	0.203727	0.374448	-0.10346	-0.371839	-0.0576267	-0.133737	0.121705	0.289334	0.444082	0.0251721	0.121122	0.0619683				READ (n=166)	0.286635	0.427467	0.349887	0.0972031	0.000983529	0.445437	0.00107061	0.693578	0.312532	0.3682	0.0151366	5.76814e-05	0.867605	0.369934	0.675228
	SARC (n=260)	0.00182907	0.0242934	0.104547	-0.137287	-0.0239239	0.24604	-0.330321	-0.220905	-0.12918	0.0671471	0.279147	0.175553	-0.076161	0.27908	0.173093				SARC (n=260)	0.984148	0.788537	0.167482	0.0632803	0.790368	0.00039367	8.60079e-07	0.00166886	0.0823923	0.410408	4.8576e-05	0.0156395	0.349488	4.8576e-05	0.0170852
	SKCM (n=471)	0.0230464	0.115264	0.273113	-0.0429853	0.049585	0.343395	-0.0215989	0.183832	0.203056	0.313062	0.357172	0.327043	-0.0219957	0.465474	0.386717				SKCM (n=471)	0.719019	0.0308583	2.37222e-08	0.475805	0.403011	8.05627e-13	0.740125	0.000308559	5.98267e-05	8.37712e-11	7.25325e-14	1.12213e-11	0.734576	8.92128e-24	3.33328e-16
	SKCM-Metastasis (n=368)	-0.0639806	0.027043	0.188303	-0.101272	-0.00990775	0.234707	-0.090187	0.144073	0.115599	0.231089	0.249434	0.254556	-0.0698945	0.357884	0.289705				SKCM-Metastasis (n=368)	0.343051	0.711723	0.00124442	0.101119	0.892679	4.14714e-05	0.150125	0.0169416	0.0598786	5.61209e-05	1.14124e-05	7.23619e-06	0.286423	4.76845e-11	2.18521e-07
	SKCM-Primary (n=103)	0.139051	0.209849	0.247619	-0.113536	-0.0430496	0.434622	-0.006831	0.0829476	0.0985496	0.158392	0.351893	0.213308	-0.0223309	0.479256	0.405296				SKCM-Primary (n=103)	0.248162	0.0667596	0.0276046	0.369934	0.759491	2.66034e-05	0.960075	0.520935	0.438391	0.179408	0.0010066	0.0622856	0.874831	2.21514e-06	0.000112558
	STAD (n=415)	-0.0168209	0.0347459	0.212969	-0.0726151	0.236305	0.209374	-0.122799	0.0810869	-0.0286267	0.316693	0.352654	0.34357	0.142093	0.385917	0.320958				STAD (n=415)	0.814724	0.617354	0.000132254	0.242894	1.79996e-05	0.000173342	0.0368479	0.18405	0.68597	2.49261e-09	2.19398e-11	6.92207e-11	0.0149602	1.36356e-13	1.41177e-09
	TGCT (n=150)	0.0808157	0.0906385	0.0794002	-0.339067	-0.083382	-0.0330985	-0.333611	-0.183943	-0.121863	0.069001	0.203151	0.0525963	-0.316363	0.0497422	0.0176021				TGCT (n=150)	0.444698	0.389958	0.451975	0.000122642	0.427467	0.77746	0.000160589	0.0536101	0.22103	0.520884	0.0307767	0.64531	0.000366711	0.666219	0.877764
	THCA (n=509)	0.161643	0.216948	0.267666	-0.0219597	0.0924208	0.122299	-0.181075	0.187601	0.159074	0.428329	0.347109	0.400953	-0.30777	0.400775	0.310831				THCA (n=509)	0.00116119	7.64059e-06	1.5678e-08	0.723735	0.0788658	0.0172974	0.000237642	0.000136994	0.00139814	2.9215e-21	6.45123e-14	1.48511e-18	4.6351e-11	1.48511e-18	2.94882e-11
	THYM (n=120)	-0.079652	0.0139615	0.431779	0.288936	0.297606	0.296974	-0.0531153	-0.0295496	0.184288	0.293229	0.0334712	0.473671	-0.226301	0.351036	0.326501				THYM (n=120)	0.511736	0.911122	8.36243e-06	0.00521348	0.00388441	0.00394456	0.68339	0.82138	0.0892747	0.00443443	0.798273	6.25282e-07	0.0334667	0.000452192	0.00124442
	UCEC (n=545)	0.325223	0.336816	0.375779	-0.323118	-0.184042	0.153713	-0.180232	-0.0314193	0.277247	0.230999	0.373315	0.0334157	0.275808	0.578101	0.387762				UCEC (n=545)	0.00593965	0.00406037	0.00107061	0.00626807	0.144665	0.236226	0.152445	0.833903	0.0213233	0.0609238	0.00116742	0.82138	0.0221332	2.90529e-08	0.000693121
	UCS (n=57)	0.348409	0.358513	0.20906	-0.27349	-0.155097	0.0249023	-0.270704	-0.0950926	-0.0693166	0.150625	0.106377	0.0107181	0.0501128	-0.0524012	-0.194384				UCS (n=57)	0.0246217	0.0202937	0.208913	0.0882965	0.382087	0.895325	0.0908022	0.616338	0.718932	0.396354	0.561639	0.955204	0.798273	0.790368	0.248162
	UVM (n=80)	0.0476163	0.0894198	0.179152	-0.493935	-0.334356	-0.0310416	-0.434515	0.136149	0.0528611	0.31303	0.24842	-0.112369	-0.301969	0.310621	0.275991				UVM (n=80)	0.769382	0.553324	0.188392	2.66034e-05	0.00837317	0.845036	0.000309285	0.349887	0.741948	0.0149602	0.0598786	0.444698	0.0187821	0.0156395	0.0334667

## Sheet: CD4+ T cell
Coefficients																			Adj.P
	cancer	T cell CD4+ (non-regulatory)_QUANTISEQ	T cell CD4+ (non-regulatory)_XCELL	T cell CD4+ central memory_XCELL	T cell CD4+ effector memory_XCELL	T cell CD4+ memory activated_CIBERSORT	T cell CD4+ memory activated_CIBERSORT-ABS	T cell CD4+ memory resting_CIBERSORT	T cell CD4+ memory resting_CIBERSORT-ABS	T cell CD4+ memory_XCELL	T cell CD4+ naive_CIBERSORT	T cell CD4+ naive_CIBERSORT-ABS	T cell CD4+ naive_XCELL	T cell CD4+ Th1_XCELL	T cell CD4+ Th2_XCELL	T cell CD4+_EPIC	T cell CD4+_TIMER			cancer	T cell CD4+ (non-regulatory)_QUANTISEQ	T cell CD4+ (non-regulatory)_XCELL	T cell CD4+ central memory_XCELL	T cell CD4+ effector memory_XCELL	T cell CD4+ memory activated_CIBERSORT	T cell CD4+ memory activated_CIBERSORT-ABS	T cell CD4+ memory resting_CIBERSORT	T cell CD4+ memory resting_CIBERSORT-ABS	T cell CD4+ memory_XCELL	T cell CD4+ naive_CIBERSORT	T cell CD4+ naive_CIBERSORT-ABS	T cell CD4+ naive_XCELL	T cell CD4+ Th1_XCELL	T cell CD4+ Th2_XCELL	T cell CD4+_EPIC	T cell CD4+_TIMER
	ACC (n=79)	-0.0497351	-0.095466	-0.177923	0.000728597	0.208181	0.208181	-0.1109	0.140145	0.10213	-0.148658	-0.150012	-0.0414506	-0.115161	0.114486	-0.113672	0.024174			ACC (n=79)	0.775793	0.541122	0.227338	0.996701	0.147404	0.147404	0.472532	0.351282	0.516053	0.32177	0.316264	0.812852	0.457616	0.460555	0.463304	0.894503
	BLCA (n=408)	-0.212327	0.00951895	-0.311271	0.0708754	0.383208	0.405404	-0.0273108	0.172369	0.178062	-0.360207	-0.358042	0.0448645	0.212998	0.392991	-0.264466	0.0873733			BLCA (n=408)	0.00020602	0.905921	1.21309e-08	0.282418	6.7115e-13	2.01995e-14	0.71098	0.00331343	0.00237693	1.69929e-11	2.30883e-11	0.51616	0.000196097	1.38804e-13	2.12627e-06	0.171534
	BRCA (n=1100)	-0.0427348	0.0560214	-0.0318877	0.238035	0.260344	0.266694	-0.0256587	0.23609	0.301424	-0.0393968	-0.0392764	0.160623	0.101396	0.290032	0.0647516	0.152826			BRCA (n=1100)	0.284973	0.147404	0.439349	7.18922e-13	3.06747e-15	5.80849e-16	0.539875	1.08926e-12	3.17823e-20	0.328109	0.328706	2.80772e-06	0.00484688	8.03474e-19	0.0880848	8.6725e-06
	BRCA-Basal (n=191)	-0.174366	0.198064	0.0186653	0.136391	0.263216	0.297631	-0.0787846	0.201972	0.256681	-0.0482851	-0.0494199	0.16306	0.136396	0.101189	0.12666	0.235164			BRCA-Basal (n=191)	0.050228	0.0241071	0.873422	0.14229	0.00183928	0.000329849	0.425796	0.0214566	0.00244706	0.645846	0.637853	0.069785	0.14229	0.291239	0.173979	0.00615054
	BRCA-Her2 (n=82)	0.130952	-0.0221974	0.0648985	0.260891	0.0461793	0.0582597	0.0437864	0.31255	0.142142	NA	NA	0.113784	0.0160369	-0.038431	0.0350876	0.171085			BRCA-Her2 (n=82)	0.389841	0.904876	0.696414	0.0601455	0.794702	0.732727	0.804322	0.0214566	0.349612	NA	NA	0.463912	0.936757	0.825932	0.841993	0.251238
	BRCA-LumA (n=568)	0.0741008	0.032295	-0.00500859	0.296545	0.187897	0.188514	-0.013251	0.214845	0.210381	-0.0268057	-0.0263889	0.173509	0.0483352	0.232475	0.0988098	0.136979			BRCA-LumA (n=568)	0.171534	0.581967	0.948115	8.46252e-11	9.76647e-05	9.23612e-05	0.836788	5.85862e-06	9.13747e-06	0.658566	0.660527	0.000357309	0.389841	7.63135e-07	0.0564826	0.00615533
	BRCA-LumB (n=219)	-0.191618	-0.0467266	0.000447745	0.269603	0.207315	0.21194	-0.00410107	0.18405	0.213757	-0.0691503	-0.0691503	0.0372609	-0.0734617	0.0921381	0.0506407	0.0634521			BRCA-LumB (n=219)	0.0217162	0.639651	0.996701	0.000711359	0.0121358	0.0100734	0.975651	0.02715	0.00935459	0.463912	0.463912	0.717157	0.435727	0.315314	0.604414	0.509771
	CESC (n=306)	-0.2998	0.0607348	0.00826346	0.245144	0.274205	0.299409	-0.287376	-0.117234	0.145896	-0.139752	-0.139752	0.48622	0.298914	0.069572	-0.0067108	0.316629			CESC (n=306)	2.8662e-06	0.438409	0.935656	0.000194912	2.25758e-05	2.93705e-06	7.86776e-06	0.105982	0.0368464	0.0476627	0.0476627	4.01412e-16	3.0028e-06	0.367457	0.948115	6.24792e-07
	CHOL (n=36)	0.221961	-0.00543473	-0.251857	0.420769	0.145939	0.145939	0.183066	0.442974	0.293039	-0.191337	-0.191337	0.133585	-0.380842	0.114981	0.235209	-0.124352			CHOL (n=36)	0.311906	0.98624	0.241974	0.0295925	0.524384	0.524384	0.414118	0.0216552	0.164664	0.389841	0.389841	0.563312	0.0557494	0.632126	0.282172	0.595792
	COAD (n=458)	-0.284144	-0.102114	-0.0801343	0.0594565	0.0290695	0.0905486	-0.242853	0.413648	0.171502	-0.0674854	-0.067481	0.332924	-0.143783	0.0925697	0.189508	0.346218			COAD (n=458)	1.08532e-05	0.169638	0.291667	0.450292	0.735299	0.22821	0.000238852	1.50567e-11	0.0130858	0.385709	0.385709	1.46182e-07	0.041122	0.219927	0.00557965	3.91305e-08
	DLBC (n=48)	0.226068	0.162479	-0.0489271	0.311122	0.498405	0.570313	-0.466006	-0.471175	0.304637	-0.0287847	-0.0168152	0.13341	0.202001	0.169347	0.242712	0.00859913			DLBC (n=48)	0.257377	0.435141	0.835568	0.10018	0.00334006	0.000472796	0.00711856	0.00638413	0.107859	0.907172	0.951636	0.526946	0.316264	0.411253	0.220342	0.975651
	ESCA (n=185)	-0.131848	0.120593	-0.00762967	-0.0604745	0.22894	0.270315	-0.19369	0.24291	0.320577	-0.112009	-0.112009	0.255262	0.0213089	0.10031	0.166156	0.14762			ESCA (n=185)	0.147404	0.190145	0.952288	0.539988	0.00667774	0.00106136	0.0246129	0.00370556	6.75455e-05	0.22821	0.22821	0.00216744	0.84632	0.286135	0.0586785	0.100415
	GBM (n=153)	-0.213529	-0.168841	0.116355	0.178776	0.0296182	0.0326541	-0.117005	0.101851	0.0044743	-0.120951	-0.120912	0.226069	0.0137005	-0.0357558	0.0341402	0.242739			GBM (n=153)	0.0303413	0.101331	0.282418	0.0792329	0.815286	0.796027	0.282132	0.351097	0.975651	0.261653	0.261653	0.0220229	0.920504	0.776221	0.788428	0.0129739
	HNSC (n=522)	-0.269056	0.192212	-0.0251461	0.0953684	0.330803	0.380272	0.0386075	0.287605	0.293771	-0.246017	-0.245809	0.345238	0.223621	0.19318	0.122108	0.342908			HNSC (n=522)	1.48482e-08	9.9278e-05	0.686953	0.0753499	1.12447e-12	1.28821e-16	0.517747	1.04705e-09	4.10204e-10	2.95353e-07	2.99245e-07	9.67214e-14	4.01058e-06	9.23612e-05	0.0194316	1.38804e-13
	HNSC-HPV- (n=422)	-0.274821	0.180219	-0.00987542	0.137039	0.302112	0.353528	0.0832039	0.335227	0.316762	-0.243246	-0.243264	0.36442	0.225807	0.175861	0.115067	0.342588			HNSC-HPV- (n=422)	2.1385e-07	0.00126617	0.898079	0.0178055	8.2187e-09	5.7894e-12	0.174619	8.46252e-11	1.15524e-09	5.87516e-06	5.87516e-06	1.13698e-12	3.08468e-05	0.00169782	0.050228	2.92894e-11
	HNSC-HPV+ (n=98)	-0.134119	0.204717	-0.0423572	-0.107422	0.436692	0.475578	-0.20119	0.00377992	0.177164	-0.273199	-0.272861	0.274992	0.203714	0.298139	0.0658111	0.299779			HNSC-HPV+ (n=98)	0.322179	0.110353	0.788624	0.439952	0.000104569	1.5619e-05	0.117737	0.984457	0.174619	0.0254923	0.0256229	0.0245134	0.112319	0.0135669	0.658079	0.0130731
	KICH (n=66)	0.0428942	-0.189174	-0.111369	0.0736955	NA	NA	-0.0399542	0.403562	0.0302316	-0.0956452	-0.0956452	0.210154	-0.125595	0.238587	0.0209483	0.220584			KICH (n=66)	0.816007	0.226519	0.505501	0.670258	NA	NA	0.828257	0.00321627	0.874944	0.564253	0.564253	0.171534	0.442416	0.112319	0.916452	0.147404
	KIRC (n=533)	-0.0753994	-0.132207	-0.000404999	0.24866	0.102668	0.104053	-0.218735	0.15807	0.0784175	-0.0566511	-0.0566511	0.265134	-0.0935018	0.233475	0.0982526	0.164841			KIRC (n=533)	0.189038	0.0133908	0.996701	5.52519e-07	0.0612392	0.0581517	1.35179e-05	0.0025292	0.171534	0.338721	0.338721	7.79761e-08	0.0950331	3.0028e-06	0.0761861	0.00158293
	KIRP (n=290)	0.0562306	0.129335	-0.237876	0.46724	0.0492844	0.0492844	-0.419415	0.19526	0.179493	NA	NA	0.0688213	-0.160992	0.241188	0.23874	0.159129			KIRP (n=290)	0.494831	0.0812375	0.000533878	7.48648e-14	0.549075	0.549075	3.15172e-11	0.00565393	0.0119154	NA	NA	0.389841	0.0254923	0.000438089	0.000510807	0.0269229
	LGG (n=516)	0.039742	0.00850506	-0.0172788	0.123292	0.117537	0.118037	0.178032	0.284061	-0.00122035	-0.15446	-0.144741	-0.0817342	0.17558	0.194983	-0.332412	0.440941			LGG (n=516)	0.51385	0.904876	0.796027	0.0201103	0.0263276	0.0257505	0.000438089	3.12849e-09	0.9866	0.00266702	0.00531121	0.144218	0.000533878	9.9278e-05	1.79245e-12	7.75906e-22
	LIHC (n=371)	0.0341822	0.0841059	-0.186327	0.147315	0.143991	0.146903	-0.119133	0.197084	0.181204	-0.0591635	-0.0594349	0.274306	0.00454182	0.257817	0.163807	0.0992444			LIHC (n=371)	0.645846	0.209285	0.0020338	0.0179318	0.0212568	0.0182744	0.0601455	0.00102034	0.00271921	0.389841	0.389841	1.87773e-06	0.962026	8.21042e-06	0.00749345	0.130345
	LUAD (n=515)	-0.114756	0.0676592	-0.0113583	0.153447	-0.0163205	0.00121102	0.0190773	0.333026	0.0872785	-0.0709433	-0.0709433	0.256223	-0.0274169	-0.117912	0.39042	0.146907			LUAD (n=515)	0.0273689	0.22821	0.868965	0.00244706	0.804587	0.9866	0.773273	7.54939e-13	0.107859	0.204136	0.204136	8.12627e-08	0.658566	0.0241071	1.487e-17	0.00387545
	LUSC (n=501)	-0.101395	0.0402862	-0.0312008	0.224743	0.200648	0.233293	0.152055	0.413896	0.14714	-0.119829	-0.119703	0.194479	-0.00945322	-0.0050737	0.136342	0.135483			LUSC (n=501)	0.0601455	0.508269	0.617104	5.12694e-06	5.98392e-05	2.09622e-06	0.00321889	3.27006e-19	0.0045198	0.0241071	0.024199	0.000104569	0.893586	0.948115	0.00919498	0.00968283
	MESO (n=87)	-0.141371	-0.0518105	-0.27091	0.191585	0.228909	0.226125	-0.14845	0.0604449	0.251373	NA	NA	0.177931	0.278591	0.196199	-0.147735	0.297161			MESO (n=87)	0.3085	0.739876	0.0302538	0.14947	0.0762426	0.0807783	0.282418	0.691273	0.0482771	NA	NA	0.185366	0.0257505	0.141593	0.284127	0.0170819
	OV (n=303)	-0.231145	0.0519474	0.151403	0.280972	0.0285748	0.0301169	-0.113183	0.354954	0.0381212	-0.106366	-0.106366	0.215788	0.138783	-0.0895518	0.181675	0.0811123			OV (n=303)	0.00103158	0.536106	0.0407274	4.03179e-05	0.756961	0.739549	0.144218	8.46665e-08	0.660527	0.171534	0.171534	0.00239041	0.0633497	0.261653	0.0123639	0.314081
	PAAD (n=179)	0.0330065	0.00127243	-0.203573	0.0328701	0.228465	0.228617	-0.209345	0.312953	0.105215	0.148296	0.148296	0.303361	-0.265313	0.135821	0.181289	0.0947344			PAAD (n=179)	0.771045	0.993127	0.0214895	0.771121	0.00861	0.00859642	0.0177356	0.000165788	0.278795	0.107859	0.107859	0.000274959	0.00184172	0.147404	0.0424304	0.330579
	PCPG (n=181)	0.0187169	-0.0591203	-0.254834	0.42394	0.0491539	0.0522888	0.174437	0.562418	0.0952401	0.0210761	0.0210761	-0.0872568	-0.092555	0.0599151	0.0073287	0.233909			PCPG (n=181)	0.874944	0.564253	0.00329452	1.11912e-07	0.646097	0.62275	0.0557494	8.57639e-14	0.334435	0.854728	0.854728	0.385005	0.349614	0.562296	0.956978	0.00770153
	PRAD (n=498)	0.122177	0.0501588	-0.0719135	0.241345	0.0407308	0.0418593	0.0471496	0.421536	0.27538	NA	NA	0.110373	-0.185816	0.15391	0.0425317	0.497073			PRAD (n=498)	0.0312256	0.433306	0.240457	4.62176e-06	0.528026	0.5188	0.463104	1.49628e-17	1.11912e-07	NA	NA	0.0560272	0.000639155	0.0056809	0.51385	1.51304e-24
	READ (n=166)	-0.237601	-0.03641	-0.136852	0.0656327	-0.0522487	-0.0125015	-0.421633	0.268764	0.0635202	-0.0241066	-0.0241066	0.19507	-0.303846	-0.0250886	0.238735	0.390896			READ (n=166)	0.0557494	0.816007	0.310112	0.657855	0.732727	0.94751	0.000184878	0.0269229	0.662386	0.880249	0.880249	0.130345	0.0113337	0.877073	0.0547122	0.000640967
	SARC (n=260)	-0.128153	-0.00297492	-0.260498	0.343733	0.1362	0.141931	-0.0975901	0.228554	0.235721	-0.0706688	-0.0694366	0.263867	-0.0963165	0.238684	-0.147919	0.476302			SARC (n=260)	0.09624	0.97866	0.000196097	3.17434e-07	0.073451	0.0601455	0.222945	0.00135692	0.00090553	0.389841	0.398163	0.000161987	0.22821	0.000753206	0.0492846	9.67214e-14
	SKCM (n=471)	-0.220213	0.0652893	-0.0887537	0.0690579	0.303925	0.335894	-0.0813544	0.0303605	0.439564	-0.0339554	-0.0285929	0.375842	0.0696612	0.280351	0.0147378	0.325777			SKCM (n=471)	1.28712e-05	0.267548	0.116691	0.236637	4.29029e-10	3.10663e-12	0.155309	0.637853	8.13353e-21	0.587418	0.658566	3.47656e-15	0.232079	1.21844e-08	0.8283	1.57799e-11
	SKCM-Metastasis (n=368)	-0.127209	0.0660499	-0.0377115	0.0787846	0.295114	0.329029	-0.106117	0.003152	0.358621	-0.0305527	-0.0255834	0.351573	0.095375	0.253458	-0.01139	0.258226			SKCM-Metastasis (n=368)	0.0404614	0.328109	0.598054	0.234837	1.46182e-07	2.77869e-09	0.0969763	0.975651	5.24044e-11	0.676154	0.735299	1.36607e-10	0.142578	9.00755e-06	0.888736	5.87516e-06
	SKCM-Primary (n=103)	-0.364654	0.00545302	-0.132353	0.152153	0.252561	0.262804	-0.0765588	-0.00923543	0.33714	-0.037937	-0.0330411	0.382387	0.0814199	0.101802	0.0290741	0.34995			SKCM-Primary (n=103)	0.000745722	0.975651	0.291667	0.220764	0.0269229	0.0215211	0.563312	0.956978	0.00212759	0.796027	0.819712	0.000357309	0.536947	0.433997	0.842647	0.00133539
	STAD (n=415)	-0.0781427	0.213309	-0.15698	0.00324974	0.231846	0.28465	-0.264873	0.367082	0.317277	0.0618537	0.0618537	0.417511	-0.150803	0.0697362	0.300297	0.232887			STAD (n=415)	0.223044	0.000154671	0.00721728	0.97447	3.08468e-05	1.59589e-07	1.39903e-06	3.06979e-12	3.16183e-09	0.344432	0.344432	9.12426e-16	0.0102912	0.282418	2.65609e-08	2.84465e-05
	TGCT (n=150)	-0.0365931	0.0099928	-0.138755	0.292406	0.151956	0.176173	0.171405	0.326376	0.189598	-0.0948182	-0.0941548	0.204219	0.00570773	-0.0661374	0.0344287	0.111145			TGCT (n=150)	0.76284	0.946449	0.171534	0.00136851	0.131077	0.0722603	0.0812375	0.000274959	0.050228	0.373721	0.37778	0.0322336	0.971514	0.545603	0.776221	0.286135
	THCA (n=509)	-0.0884563	0.0838156	-0.153684	0.327031	0.147189	0.147293	0.153601	0.459768	0.322424	-0.11426	-0.114028	0.229417	-0.162033	0.266204	0.159054	0.412351			THCA (n=509)	0.105694	0.128611	0.0025292	2.5559e-12	0.00397468	0.00396469	0.0025292	2.13225e-24	5.32522e-12	0.029083	0.0293948	2.39205e-06	0.00136851	2.56369e-08	0.00173008	1.95782e-19
	THYM (n=120)	0.135956	-0.132053	-0.0928916	-0.151619	0.235912	0.237355	-0.0885702	-0.0217659	-0.0880713	-0.23978	-0.145116	0.0130272	0.0470805	0.00346872	0.242714	0.033051			THYM (n=120)	0.246322	0.261653	0.447845	0.189038	0.0281941	0.02715	0.469531	0.878774	0.47222	0.0257505	0.213684	0.935656	0.725588	0.984457	0.0242294	0.812226
	UCEC (n=545)	-0.191098	0.0616327	-0.0906675	0.176446	0.325735	0.326676	-0.127686	0.000366367	0.182231	-0.179645	-0.181506	0.137204	0.281213	0.120312	-0.142048	0.426327			UCEC (n=545)	0.144218	0.676896	0.52393	0.180141	0.00658832	0.00641501	0.351097	0.997297	0.167369	0.171534	0.169309	0.314081	0.0220709	0.385709	0.293437	0.000184154
	UCS (n=57)	0.199586	0.388499	-0.0813316	0.221889	0.11781	0.11781	0.253465	0.477888	-0.0683906	-0.0467826	-0.0467826	-0.0104811	-0.269155	-0.0708453	-0.30424	0.0508421			UCS (n=57)	0.252514	0.0123666	0.672589	0.19575	0.52393	0.52393	0.132434	0.00127695	0.732727	0.818671	0.818671	0.968289	0.105982	0.723255	0.0601455	0.804587
	UVM (n=80)	-0.0998825	-0.0695088	-0.0875984	0.231219	0.0438119	0.0474953	-0.128575	0.0701031	0.126355	-0.32457	-0.295976	0.327483	-0.106003	0.28063	0.109829	0.15432			UVM (n=80)	0.51385	0.660527	0.564253	0.0916195	0.796027	0.777994	0.385709	0.658566	0.389841	0.0122846	0.0242294	0.0114274	0.483074	0.0329239	0.463912	0.286135

## Sheet: CD8+ T cell
Coefficients													Adj.P
	cancer	T cell CD8+ central memory_XCELL	T cell CD8+ effector memory_XCELL	T cell CD8+ naive_XCELL	T cell CD8+_CIBERSORT	T cell CD8+_CIBERSORT-ABS	T cell CD8+_EPIC	T cell CD8+_MCPCOUNTER	T cell CD8+_QUANTISEQ	T cell CD8+_TIMER	T cell CD8+_XCELL			cancer	T cell CD8+ central memory_XCELL	T cell CD8+ effector memory_XCELL	T cell CD8+ naive_XCELL	T cell CD8+_CIBERSORT	T cell CD8+_CIBERSORT-ABS	T cell CD8+_EPIC	T cell CD8+_MCPCOUNTER	T cell CD8+_QUANTISEQ	T cell CD8+_TIMER	T cell CD8+_XCELL
	ACC (n=79)	0.140736	0.138096	-0.0087633	0.130893	0.245123	-0.131357	0.268003	0.158208	0.229912	0.139345			ACC (n=79)	0.289213	0.297527	0.948456	0.323939	0.0536282	0.323939	0.0336652	0.228019	0.0722232	0.293867
	BLCA (n=408)	0.446528	0.335288	-0.021384	0.237858	0.533514	0.0408804	0.527264	0.530856	0.392341	0.267537			BLCA (n=408)	1.50606e-18	1.67125e-10	0.728146	1.04747e-05	3.22436e-27	0.506454	1.62343e-26	6.3957e-27	3.06195e-14	5.55204e-07
	BRCA (n=1100)	0.371937	0.0959118	0.124037	0.0209787	0.269442	0.0961304	0.332985	0.365431	-0.00921324	0.317296			BRCA (n=1100)	1.3468e-32	0.00459429	0.000204026	0.574955	3.60023e-17	0.00453223	5.61459e-26	2.03261e-31	0.803885	1.41638e-23
	BRCA-Basal (n=191)	0.419624	0.363439	0.166732	0.015046	0.271706	0.182154	0.350874	0.383235	0.0425668	0.384857			BRCA-Basal (n=191)	2.8892e-08	2.34293e-06	0.0424103	0.865423	0.000610821	0.0253683	5.67628e-06	5.35718e-07	0.63939	4.8505e-07
	BRCA-Her2 (n=82)	0.400727	0.0177304	0.15525	0.0963577	0.326932	-0.080141	0.383248	0.389389	0.152428	0.308113			BRCA-Her2 (n=82)	0.00100796	0.898199	0.24106	0.492909	0.00861698	0.570392	0.0017641	0.00146043	0.249892	0.0138817
	BRCA-LumA (n=568)	0.294637	-0.00681187	0.0801194	0.0153565	0.228306	0.0801201	0.315448	0.331764	0.0237663	0.249678			BRCA-LumA (n=568)	3.59321e-11	0.895108	0.0954495	0.765875	4.76696e-07	0.0954495	1.04045e-12	5.28052e-14	0.651688	3.01843e-08
	BRCA-LumB (n=219)	0.228184	0.0806584	0.103652	-0.0389215	0.212273	0.00370544	0.284754	0.289506	0.0228444	0.227924			BRCA-LumB (n=219)	0.00282766	0.323494	0.196154	0.652301	0.00564279	0.964139	0.000146243	0.000109905	0.786559	0.00285035
	CESC (n=306)	0.550546	0.526403	0.103949	0.279931	0.508602	0.105069	0.261737	0.351573	0.478247	0.496446			CESC (n=306)	2.77981e-22	3.37818e-20	0.114536	5.97128e-06	1.00951e-18	0.110411	2.55699e-05	6.4178e-09	1.95635e-16	8.50643e-18
	CHOL (n=36)	0.448025	0.101259	0.140311	0.0671071	0.258329	0.481288	0.303499	0.340775	0.40593	0.366077			CHOL (n=36)	0.0116397	0.628747	0.492909	0.744511	0.174647	0.00608399	0.105283	0.0649652	0.0245723	0.0456075
	COAD (n=458)	0.424981	0.182095	-0.156634	0.139851	0.5728	-0.175577	0.308644	0.438874	0.374452	0.281456			COAD (n=458)	8.79426e-13	0.00455108	0.0150819	0.0315345	3.08382e-24	0.00614663	5.29352e-07	1.23119e-13	5.5869e-10	5.74781e-06
	DLBC (n=48)	0.424211	0.515966	-0.226537	0.266966	0.552438	0.278705	0.299719	0.355536	0.62716	0.360491			DLBC (n=48)	0.00963224	0.00113759	0.197904	0.124122	0.000394683	0.106722	0.0804726	0.0345349	2.86207e-05	0.031806
	ESCA (n=185)	0.331418	0.156058	0.0699784	0.153097	0.40901	-0.251059	0.436016	0.431021	0.386529	0.271675			ESCA (n=185)	1.44866e-05	0.0536282	0.414888	0.0582422	4.04812e-08	0.00137793	3.57737e-09	5.70581e-09	2.69225e-07	0.000482739
	GBM (n=153)	0.187594	0.152398	-0.141719	0.0492861	0.210156	-0.0798006	0.272551	-0.0450399	0.133157	0.0618994			GBM (n=153)	0.0426565	0.104404	0.13228	0.630402	0.0218429	0.417635	0.00248282	0.657097	0.158498	0.543682
	HNSC (n=522)	0.543184	0.423805	0.0731874	0.286368	0.513075	-0.119195	0.576451	0.552143	0.016012	0.427526			HNSC (n=522)	1.66164e-37	7.75527e-22	0.139587	3.95226e-10	5.44398e-33	0.0135512	4.37639e-43	6.59206e-39	0.763194	3.18479e-22
	HNSC-HPV- (n=422)	0.566403	0.433386	0.0835482	0.260711	0.519425	-0.201532	0.61844	0.57097	0.0208923	0.449232			HNSC-HPV- (n=422)	7.38259e-34	7.97198e-19	0.128197	3.82955e-07	1.021e-27	0.000115581	8.07123e-42	1.7117e-34	0.724046	2.70924e-20
	HNSC-HPV+ (n=98)	0.45837	0.418107	0.07016	0.382526	0.520701	0.221978	0.428361	0.478803	0.111748	0.337217			HNSC-HPV+ (n=98)	1.60774e-05	0.000108589	0.578636	0.000467126	5.11517e-07	0.0536282	6.78879e-05	5.67628e-06	0.354788	0.0024143
	KICH (n=66)	0.318512	0.0329285	0.04561	0.0732221	0.351633	-0.00603362	0.472264	0.173229	0.120177	0.0845349			KICH (n=66)	0.0157321	0.825514	0.760074	0.628747	0.00711816	0.964365	0.00016586	0.212144	0.405128	0.570392
	KIRC (n=533)	0.339326	0.292018	0.145138	0.0942329	0.376106	0.381907	0.408968	0.40501	0.0848541	0.34506			KIRC (n=533)	3.55321e-13	6.38995e-10	0.00341061	0.0623076	3.84049e-16	1.22169e-16	4.38602e-19	1.00951e-18	0.0954495	1.31104e-13
	KIRP (n=290)	0.487081	0.0770896	0.00638757	0.0837549	0.402188	-0.208975	0.518886	0.405143	0.40927	0.297384			KIRP (n=290)	5.47986e-16	0.268951	0.927955	0.226977	8.12298e-11	0.00146922	2.57324e-18	5.66099e-11	3.42166e-11	3.24062e-06
	LGG (n=516)	0.00594557	0.0263673	0.0116605	0.120306	0.192461	-0.266349	0.16291	0.118005	-0.321509	0.0767457			LGG (n=516)	0.910501	0.629802	0.828271	0.0138817	5.57226e-05	1.18388e-08	0.000729715	0.0158324	2.8402e-12	0.126677
	LIHC (n=371)	0.404356	0.205115	-0.103208	0.165426	0.415279	0.0269397	0.480826	0.457139	0.447925	0.311949			LIHC (n=371)	3.02384e-14	0.000280016	0.078683	0.00388799	4.79162e-15	0.671761	2.2097e-20	2.43542e-18	1.3714e-17	1.14901e-08
	LUAD (n=515)	0.16939	0.134709	-0.152257	-0.058564	0.281948	-0.0213693	0.202875	0.273384	0.311888	0.150493			LUAD (n=515)	0.000350097	0.00502414	0.00140955	0.24204	7.14567e-10	0.685694	1.46782e-05	2.55799e-09	6.46941e-12	0.00160394
	LUSC (n=501)	0.385593	0.296963	-0.0740718	0.1278	0.479847	0.0708524	0.41466	0.46428	0.429738	0.348746			LUSC (n=501)	1.58543e-17	1.5136e-10	0.1406	0.00878712	1.46806e-27	0.159828	2.7497e-20	1.01565e-25	7.75527e-22	2.52265e-14
	MESO (n=87)	0.38988	0.253996	-0.179734	0.0818624	0.223968	0.200184	0.264153	0.233849	0.210637	0.232175			MESO (n=87)	0.000482739	0.0295618	0.133473	0.527614	0.0574372	0.0932694	0.0231284	0.0464517	0.0754331	0.0481538
	OV (n=303)	0.276105	0.130541	-0.17909	0.070344	0.323083	-0.195318	0.21095	0.187086	0.29467	0.178421			OV (n=303)	2.50089e-05	0.0575357	0.00794202	0.323939	5.50583e-07	0.00373077	0.00160959	0.00552975	5.97128e-06	0.00810829
	PAAD (n=179)	0.31634	0.148645	0.119183	0.0591493	0.415836	-0.0542002	0.419163	0.412701	0.440103	0.283			PAAD (n=179)	6.08935e-05	0.0747733	0.158498	0.514191	5.20384e-08	0.550879	3.95342e-08	6.77402e-08	6.27792e-09	0.000389966
	PCPG (n=181)	0.226585	0.0361666	-0.00167562	0.225135	0.52141	-0.0411578	0.515225	0.398437	-0.0934854	0.110059			PCPG (n=181)	0.00580168	0.689153	0.982854	0.0060929	2.45019e-12	0.656513	4.92849e-12	3.07089e-07	0.283329	0.199753
	PRAD (n=498)	0.307405	0.0453798	-0.0795845	-0.0254147	0.475604	-0.0230112	0.170772	0.329388	-0.0698309	0.22012			PRAD (n=498)	5.88651e-10	0.418672	0.139587	0.65966	9.62963e-24	0.68795	0.000975395	2.48556e-11	0.198218	1.51922e-05
	READ (n=166)	0.192934	0.0721211	-0.125054	0.0509158	0.481878	-0.261187	0.0804025	0.29523	0.29755	0.358996			READ (n=166)	0.0954495	0.569057	0.293867	0.685694	4.21932e-06	0.0206396	0.523195	0.00810829	0.00764733	0.00105442
	SARC (n=260)	0.535435	0.248093	0.0106607	0.247867	0.442615	-0.0146734	0.492766	0.38777	0.188282	0.333207			SARC (n=260)	1.31119e-18	0.000206236	0.888402	0.000208217	1.95924e-12	0.842791	1.50422e-15	1.36012e-09	0.00568116	3.07199e-07
	SKCM (n=471)	0.612696	0.264801	0.210103	0.397539	0.635942	0.30311	0.675998	0.659833	0.280675	0.534025			SKCM (n=471)	1.53848e-46	3.11003e-08	1.52328e-05	6.70503e-18	3.6839e-51	1.5136e-10	1.03635e-59	2.52095e-56	3.79788e-09	1.25335e-33
	SKCM-Metastasis (n=368)	0.558552	0.292188	0.22119	0.386712	0.600537	0.290988	0.627031	0.616452	0.263751	0.491677			SKCM-Metastasis (n=368)	4.16564e-29	7.05635e-08	6.49715e-05	2.36597e-13	1.51789e-34	8.03788e-08	1.98215e-38	7.18521e-37	1.40025e-06	6.6997e-22
	SKCM-Primary (n=103)	0.600574	0.0525072	0.29632	0.458026	0.584899	0.26841	0.665539	0.633924	0.215031	0.49922			SKCM-Primary (n=103)	1.0705e-10	0.657097	0.00461926	3.62314e-06	4.36658e-10	0.0107208	1.25979e-13	4.07971e-12	0.0449084	2.96012e-07
	STAD (n=415)	0.490757	0.294146	-0.00566932	0.157281	0.514627	0.055365	0.43475	0.47385	0.711361	0.402793			STAD (n=415)	2.87437e-23	1.87991e-08	0.923954	0.00402606	7.62813e-26	0.338116	4.8068e-18	1.34152e-21	2.10437e-57	1.93415e-15
	TGCT (n=150)	0.334507	0.355128	-0.300752	-0.108327	0.309789	-0.216419	0.345756	0.433221	0.198083	0.270524			TGCT (n=150)	8.28292e-05	2.55699e-05	0.00046619	0.240181	0.000300286	0.0138817	4.45244e-05	1.37774e-07	0.0253683	0.00181265
	THCA (n=509)	0.433759	0.224095	-0.115065	0.0678294	0.472966	-0.0723703	0.411989	0.418427	-0.370797	0.331457			THCA (n=509)	1.00922e-22	1.63718e-06	0.017615	0.17478	2.61729e-27	0.145652	1.98725e-20	4.17494e-21	1.52796e-16	2.91431e-13
	THYM (n=120)	0.266674	0.275278	-0.291275	0.131225	0.354904	-0.275639	-0.271534	-0.261832	-0.328617	0.103841			THYM (n=120)	0.00695726	0.00530752	0.00305252	0.20589	0.000226119	0.00526156	0.00594794	0.00810829	0.000707905	0.323939
	UCEC (n=545)	0.497426	0.231802	0.160071	0.277402	0.436833	0.026851	0.377056	0.477848	-0.0774894	0.399805			UCEC (n=545)	2.34293e-06	0.0447719	0.176426	0.0144986	5.15973e-05	0.828743	0.000620743	6.66963e-06	0.543682	0.000257154
	UCS (n=57)	0.0986897	-0.0817183	-0.0352194	-0.0462341	0.301003	-0.311347	0.359342	0.323731	0.131253	-0.047877			UCS (n=57)	0.550879	0.628747	0.828743	0.777333	0.0430387	0.0354943	0.0136563	0.0281975	0.41407	0.77011
	UVM (n=80)	0.536611	0.168678	0.20021	0.55464	0.699156	0.0548018	0.82432	0.693751	0.0449543	0.414194			UVM (n=80)	1.41777e-06	0.183899	0.110411	5.06569e-07	7.02656e-12	0.685694	2.83078e-19	1.21088e-11	0.7424	0.000394683

## Sheet: DC
Coefficients														Adj.P
	cancer	Myeloid dendritic cell activated_CIBERSORT	Myeloid dendritic cell activated_CIBERSORT-ABS	Myeloid dendritic cell activated_XCELL	Myeloid dendritic cell resting_CIBERSORT	Myeloid dendritic cell resting_CIBERSORT-ABS	Myeloid dendritic cell_MCPCOUNTER	Myeloid dendritic cell_QUANTISEQ	Myeloid dendritic cell_TIMER	Myeloid dendritic cell_XCELL	Plasmacytoid dendritic cell_XCELL				cancer	Myeloid dendritic cell activated_CIBERSORT	Myeloid dendritic cell activated_CIBERSORT-ABS	Myeloid dendritic cell activated_XCELL	Myeloid dendritic cell resting_CIBERSORT	Myeloid dendritic cell resting_CIBERSORT-ABS	Myeloid dendritic cell_MCPCOUNTER	Myeloid dendritic cell_QUANTISEQ	Myeloid dendritic cell_TIMER	Myeloid dendritic cell_XCELL	Plasmacytoid dendritic cell_XCELL
	ACC (n=79)	-0.346103	-0.270693	0.331722	0.107712	0.112871	0.180896	-0.0108215	0.163506	0.41827	0.185928				ACC (n=79)	0.00527838	0.0352394	0.0079298	0.432904	0.412135	0.173592	0.944206	0.223933	0.000516691	0.161547
	BLCA (n=408)	-0.330132	-0.193766	0.743162	0.0415489	0.110587	0.477377	-0.155431	0.583982	0.610159	0.554813				BLCA (n=408)	2.96142e-10	0.000418611	6.04406e-64	0.48953	0.054478	1.50068e-21	0.00542093	5.90905e-34	9.43123e-38	3.89044e-30
	BRCA (n=1100)	-0.017876	-0.00861348	0.51534	0.00202129	0.0838555	0.263599	0.0269688	0.39824	0.420777	0.479905				BRCA (n=1100)	0.632262	0.825631	1.57722e-66	0.956461	0.0147739	1.34654e-16	0.459012	5.91702e-38	1.32753e-42	9.5404e-57
	BRCA-Basal (n=191)	0.0980112	0.118343	0.514482	-0.0573582	-0.0108579	0.353802	-0.0196822	0.467996	0.362133	0.508545				BRCA-Basal (n=191)	0.259513	0.166247	1.50464e-12	0.514202	0.906591	4.62932e-06	0.83212	2.66934e-10	2.60622e-06	3.05642e-12
	BRCA-Her2 (n=82)	-0.12406	-0.118646	0.52265	0.0800936	0.140126	0.310433	0.0532715	0.427729	0.351543	0.4348				BRCA-Her2 (n=82)	0.368599	0.39176	6.77085e-06	0.563862	0.303735	0.0144593	0.710271	0.000412993	0.00482628	0.000316851
	BRCA-LumA (n=568)	-0.0467829	-0.0417396	0.452251	0.0170585	0.0930587	0.203394	-0.00091489	0.350595	0.365916	0.392059				BRCA-LumA (n=568)	0.356413	0.413089	1.51923e-26	0.747626	0.0549774	8.3348e-06	0.983443	9.52074e-16	3.77787e-17	1.03474e-19
	BRCA-LumB (n=219)	-0.0259386	-0.0191999	0.475275	-0.064434	0.0251647	0.281814	0.0860438	0.389362	0.332618	0.371861				BRCA-LumB (n=219)	0.769319	0.82902	1.26214e-11	0.439779	0.775769	0.000181893	0.298317	7.70326e-08	6.67702e-06	3.34346e-07
	CESC (n=306)	-0.295154	-0.184857	0.728972	0.110257	0.185533	0.347599	-0.0921415	0.676118	0.50919	0.554579				CESC (n=306)	1.68525e-06	0.00397145	8.36624e-46	0.10086	0.00387055	9.37808e-09	0.173592	3.1108e-37	5.85555e-19	6.33458e-23
	CHOL (n=36)	0.239955	0.227901	0.429127	0.226264	0.278389	0.249884	-0.0828565	0.670104	0.343141	0.14574				CHOL (n=36)	0.222622	0.248495	0.0180272	0.251993	0.14819	0.202696	0.695485	2.70145e-05	0.0682939	0.464151
	COAD (n=458)	-0.187186	-0.160738	0.801384	-0.0356688	0.0617373	0.691998	0.0680084	0.747546	0.751269	0.121063				COAD (n=458)	0.00370262	0.0138159	4.67401e-61	0.616252	0.377949	2.7789e-39	0.327731	5.64473e-49	1.06476e-49	0.0700383
	DLBC (n=48)	0.142734	0.147522	0.0762356	0.354682	0.35755	0.36638	-0.160371	0.573924	0.0226187	0.398004				DLBC (n=48)	0.439602	0.427838	0.695485	0.038107	0.0366428	0.0319657	0.387625	0.000208279	0.906591	0.0178619
	ESCA (n=185)	-0.116385	0.0658188	0.742999	0.0954145	0.144194	0.527818	-0.202669	0.5998	0.641188	0.207812				ESCA (n=185)	0.166247	0.443547	7.25554e-32	0.263544	0.0824687	1.12846e-13	0.0117224	2.88874e-18	1.9274e-21	0.00966054
	GBM (n=153)	-0.150165	-0.141349	0.32907	-0.0158575	-0.0073234	0.264855	-0.0178172	0.314707	0.212658	0.141852				GBM (n=153)	0.116433	0.140844	0.000206821	0.87609	0.946584	0.00361451	0.865051	0.000414306	0.0220903	0.139629
	HNSC (n=522)	-0.202942	-0.0648193	0.722767	-0.0738748	0.0844702	0.406565	0.0104819	0.554791	0.6471	0.559185				HNSC (n=522)	1.46292e-05	0.205487	2.33389e-78	0.143527	0.0929316	2.97523e-20	0.848586	8.42825e-40	5.15422e-58	1.54032e-40
	HNSC-HPV- (n=422)	-0.185799	-0.043347	0.743335	-0.071071	0.0844433	0.434415	-0.022346	0.580554	0.66081	0.552694				HNSC-HPV- (n=422)	0.000421219	0.450648	2.2444e-69	0.211139	0.131092	4.06849e-19	0.710271	2.62948e-36	5.04313e-50	2.36257e-32
	HNSC-HPV+ (n=98)	-0.292335	-0.179743	0.61889	-0.0822419	0.0505604	0.277439	0.133958	0.532329	0.533246	0.582497				HNSC-HPV+ (n=98)	0.0101416	0.131092	3.59117e-10	0.505833	0.695646	0.0152759	0.271435	2.46071e-07	2.33345e-07	7.27995e-09
	KICH (n=66)	-0.266903	-0.173425	0.693218	-0.115724	-0.113468	0.47055	0.12089	0.585622	0.64146	0.18003				KICH (n=66)	0.0509427	0.223933	5.43631e-10	0.427838	0.436067	0.000184262	0.409438	8.93808e-07	2.81232e-08	0.205487
	KIRC (n=533)	-0.160976	-0.155426	0.445452	0.229314	0.244524	0.471468	0.0794242	0.529975	0.528608	0.248991				KIRC (n=533)	0.00112151	0.00173888	4.95327e-23	1.89293e-06	3.25779e-07	5.07287e-26	0.127618	1.08828e-33	1.68284e-33	1.91333e-07
	KIRP (n=290)	-0.224659	-0.217019	0.60866	0.0690947	0.0766961	0.632799	-0.0201506	0.57777	0.611696	0.412286				KIRP (n=290)	0.000608515	0.000966159	1.19371e-26	0.335183	0.280056	2.53164e-29	0.793194	1.51799e-23	5.69234e-27	1.97868e-11
	LGG (n=516)	-0.00898423	-0.00269551	0.535738	0.141106	0.147555	0.380076	0.0408656	0.306339	0.104241	0.210845				LGG (n=516)	0.870937	0.957942	9.11124e-36	0.00395064	0.00253207	3.40502e-17	0.439602	2.81284e-11	0.037876	8.7466e-06
	LIHC (n=371)	-0.101358	-0.100327	0.48715	0.00276109	0.0730959	0.448827	0.0384694	0.585418	0.461223	0.238283				LIHC (n=371)	0.0915241	0.0948591	3.50662e-21	0.961663	0.233677	8.29998e-18	0.537488	4.14782e-32	7.31894e-19	1.95439e-05
	LUAD (n=515)	-0.0706452	-0.0141676	0.467653	0.102914	0.184923	0.332054	-0.0931639	0.544054	0.413764	0.269085				LUAD (n=515)	0.163695	0.79778	3.08121e-27	0.0374376	8.92015e-05	1.56474e-13	0.0612964	3.83116e-38	4.88002e-21	4.37666e-09
	LUSC (n=501)	-0.183629	-0.0939357	0.594554	-0.028823	0.0825466	0.488986	0.0141115	0.596574	0.556425	0.419392				LUSC (n=501)	0.000133695	0.0633848	1.39021e-45	0.589234	0.10644	4.19366e-29	0.800787	6.42912e-46	6.35336e-39	5.62986e-21
	MESO (n=87)	0.193731	0.189555	0.424199	0.121122	0.135612	0.268353	0.0323811	0.484436	0.384933	0.394331				MESO (n=87)	0.111506	0.119537	0.000128104	0.335183	0.277193	0.0227298	0.809275	7.12223e-06	0.000608515	0.000423371
	OV (n=303)	0.145627	0.196054	0.566998	0.00463204	0.0148879	0.322704	-0.10787	0.355957	0.346538	0.268387				OV (n=303)	0.0364546	0.003801	8.83089e-22	0.951589	0.848586	5.8456e-07	0.128457	2.51288e-08	6.38504e-08	4.41674e-05
	PAAD (n=179)	0.153017	0.178257	0.422968	-0.0148204	0.0650657	0.49399	0.0298519	0.644032	0.563413	0.274331				PAAD (n=179)	0.0710648	0.0338862	2.73632e-08	0.871524	0.459012	2.45694e-11	0.747626	1.18735e-20	4.5426e-15	0.000617531
	PCPG (n=181)	-0.195171	-0.13738	0.621527	0.13935	0.140164	0.388229	0.0904199	0.362926	0.705169	0.0960318				PCPG (n=181)	0.0203164	0.112583	1.61989e-18	0.107248	0.105565	6.54324e-07	0.308828	4.01999e-06	1.45134e-25	0.277707
	PRAD (n=498)	0.0263225	0.0450821	0.610399	0.113241	0.182448	0.547743	0.142078	0.529975	0.529262	0.113017				PRAD (n=498)	0.651319	0.427838	1.57875e-42	0.0356653	0.000418459	6.55159e-33	0.00708701	1.5906e-30	1.93373e-30	0.0359478
	READ (n=166)	-0.297214	-0.239002	0.737889	0.127304	0.186344	0.651388	0.0465297	0.742034	0.682428	-0.0488057				READ (n=166)	0.00842244	0.0386206	4.85568e-16	0.294766	0.115093	1.37901e-11	0.715332	2.69036e-16	5.30146e-13	0.704445
	SARC (n=260)	-0.0630421	-0.0506036	0.515294	0.0363095	0.0543603	0.520118	0.163281	0.547507	0.625964	0.302165				SARC (n=260)	0.397703	0.493315	2.89597e-17	0.632262	0.459012	1.27234e-17	0.0188891	9.51269e-20	4.86366e-27	4.2302e-06
	SKCM (n=471)	-0.217312	-0.21606	0.638048	0.0672673	0.145737	0.542357	-0.0851937	0.455884	0.484555	0.568636				SKCM (n=471)	7.38158e-06	8.3348e-06	5.23335e-52	0.205487	0.00364557	3.15779e-35	0.102981	5.34376e-24	2.35325e-27	2.77925e-39
	SKCM-Metastasis (n=368)	-0.110726	-0.10978	0.572374	0.118073	0.175947	0.518158	-0.0672028	0.468937	0.497846	0.532002				SKCM-Metastasis (n=368)	0.0594017	0.0615582	3.28453e-31	0.0431095	0.00186399	7.20505e-25	0.267715	5.17358e-20	9.21699e-23	2.20576e-26
	SKCM-Primary (n=103)	-0.280379	-0.274164	0.64853	0.134548	0.219366	0.408982	-0.27327	0.303414	0.415999	0.534069				SKCM-Primary (n=103)	0.00821421	0.00994298	6.86635e-13	0.235581	0.0436226	4.91028e-05	0.0101416	0.00387055	3.45462e-05	2.50896e-08
	STAD (n=415)	-0.23354	-0.160159	0.675027	0.197659	0.278792	0.653181	0.0343982	0.789995	0.711768	0.332357				STAD (n=415)	1.13195e-05	0.00361451	3.56881e-50	0.000252565	1.09186e-07	4.82581e-46	0.563862	1.65127e-79	4.79281e-58	1.15649e-10
	TGCT (n=150)	-0.158524	-0.157845	0.597804	0.250332	0.31578	0.579859	0.143038	0.610557	0.529555	0.271784				TGCT (n=150)	0.0847387	0.0860405	5.65029e-15	0.00438943	0.000231574	6.01059e-14	0.121468	9.73928e-16	2.00331e-11	0.00183862
	THCA (n=509)	-0.205153	-0.131635	0.541899	0.142295	0.222202	0.220183	-0.0494942	0.325575	0.450129	0.243875				THCA (n=509)	1.2662e-05	0.00691326	1.86666e-37	0.00336842	2.06777e-06	2.60077e-06	0.34118	6.64213e-13	7.20505e-25	1.54922e-07
	THYM (n=120)	0.0670139	0.0670139	0.434787	-0.233266	-0.0641149	-0.307072	-0.00742854	-0.2014	0.207393	0.412022				THYM (n=120)	0.537488	0.537488	3.41557e-06	0.0213291	0.557686	0.00179576	0.949121	0.0501983	0.0430064	1.23826e-05
	UCEC (n=545)	-0.286498	-0.238596	0.698356	0.0955409	0.102709	0.292951	-0.229382	0.195518	0.378489	0.377219				UCEC (n=545)	0.0124849	0.0415796	1.62718e-13	0.440031	0.412135	0.0103809	0.0509427	0.102004	0.000608828	0.000633738
	UCS (n=57)	-0.0931013	-0.0597712	0.754003	0.176579	0.178319	0.608268	0.190543	0.267086	0.499596	0.0289806				UCS (n=57)	0.565547	0.721489	2.58583e-10	0.266976	0.262847	3.82767e-06	0.229363	0.0823799	0.000325377	0.865051
	UVM (n=80)	NA	NA	0.831471	0.274096	0.369455	0.717069	-0.149084	-0.128341	0.788687	0.532898				UVM (n=80)	NA	NA	4.41132e-20	0.0275562	0.00197708	8.80414e-13	0.256989	0.33289	7.72536e-17	1.78778e-06

## Sheet: M
Coefficients																		Adj.P
	cancer	Macrophage M0_CIBERSORT	Macrophage M0_CIBERSORT-ABS	Macrophage M1_CIBERSORT	Macrophage M1_CIBERSORT-ABS	Macrophage M1_QUANTISEQ	Macrophage M1_XCELL	Macrophage M2_CIBERSORT	Macrophage M2_CIBERSORT-ABS	Macrophage M2_QUANTISEQ	Macrophage M2_TIDE	Macrophage M2_XCELL	Macrophage_EPIC	Macrophage_TIMER	Macrophage_XCELL	Macrophage/Monocyte_MCPCOUNTER			cancer	Macrophage M0_CIBERSORT	Macrophage M0_CIBERSORT-ABS	Macrophage M1_CIBERSORT	Macrophage M1_CIBERSORT-ABS	Macrophage M1_QUANTISEQ	Macrophage M1_XCELL	Macrophage M2_CIBERSORT	Macrophage M2_CIBERSORT-ABS	Macrophage M2_QUANTISEQ	Macrophage M2_TIDE	Macrophage M2_XCELL	Macrophage_EPIC	Macrophage_TIMER	Macrophage_XCELL	Macrophage/Monocyte_MCPCOUNTER
	ACC (n=79)	-0.15896	-0.138767	0.102898	0.131157	0.268982	0.317654	0.426045	0.558589	0.276471	-0.314477	0.284524	0.352437	0.492113	0.408083	0.625931			ACC (n=79)	0.19583	0.262205	0.407381	0.28945	0.0249641	0.00768281	0.000236168	4.71611e-07	0.0210548	0.00831588	0.0175357	0.00283452	1.50104e-05	0.000454459	5.9567e-09
	BLCA (n=408)	0.0056865	0.14255	0.363756	0.536674	0.53756	0.765459	0.374432	0.783355	0.511849	-0.572489	0.540355	0.799725	0.171803	0.756967	0.60705			BLCA (n=408)	0.914953	0.00768089	1.30862e-12	3.29589e-28	2.59432e-28	8.06778e-71	2.49787e-13	2.98268e-76	2.12618e-25	1.02001e-32	1.20381e-28	1.07942e-81	0.0012258	2.02706e-68	1.20204e-37
	BRCA (n=1100)	0.0686551	0.212664	0.275694	0.459226	0.411338	0.650475	0.138266	0.633775	0.290583	-0.660924	0.525858	0.714586	0.17856	0.678854	0.691615			BRCA (n=1100)	0.0349837	2.63721e-11	2.44156e-18	4.85176e-52	4.8059e-41	1.05178e-118	1.8606e-05	5.51343e-111	2.69077e-20	8.01179e-124	1.54596e-70	2.43219e-153	2.61716e-08	4.76461e-133	4.9181e-140
	BRCA-Basal (n=191)	-0.164791	0.0890265	0.223963	0.475039	0.504263	0.727582	0.190702	0.63758	0.618395	-0.631747	0.560131	0.700564	0.0458052	0.695369	0.682298			BRCA-Basal (n=191)	0.0342996	0.262882	0.00375173	7.23517e-11	2.83499e-12	2.63367e-29	0.0141157	9.89495e-21	2.90664e-19	2.82417e-20	2.34979e-15	2.09981e-26	0.566325	6.9105e-26	1.24699e-24
	BRCA-Her2 (n=82)	-0.0649286	0.18159	0.194711	0.4967	0.476446	0.662929	0.134293	0.62875	0.449631	-0.614611	0.47775	0.728348	0.247299	0.685375	0.472974			BRCA-Her2 (n=82)	0.605053	0.13992	0.11267	1.39851e-05	3.47009e-05	4.40222e-10	0.281865	6.22445e-09	0.000105056	1.70714e-08	3.28814e-05	9.28669e-13	0.0414071	6.40807e-11	4.02401e-05
	BRCA-LumA (n=568)	0.109152	0.18961	0.186343	0.373591	0.297977	0.561363	0.175768	0.607446	0.337018	-0.650758	0.542322	0.695363	0.240742	0.607314	0.679073			BRCA-LumA (n=568)	0.0156533	2.16697e-05	3.02508e-05	4.10724e-18	9.87645e-12	2.13052e-43	8.39744e-05	1.77364e-52	8.37944e-15	1.88113e-62	4.59644e-40	1.29727e-74	5.29685e-08	1.86446e-52	6.16436e-70
	BRCA-LumB (n=219)	-0.0588034	0.124402	0.210295	0.406656	0.387351	0.673798	0.226037	0.691303	0.462574	-0.658062	0.433829	0.631739	0.298141	0.686214	0.70409			BRCA-LumB (n=219)	0.439825	0.0959777	0.00430411	8.91791e-09	5.08793e-08	3.5387e-26	0.00208864	5.32404e-28	2.99989e-11	1.19711e-24	6.36331e-10	2.91866e-22	3.9525e-05	1.87832e-27	2.09686e-29
	CESC (n=306)	-0.206516	-0.0478433	0.471366	0.613302	0.163595	0.833332	0.466911	0.713079	0.579166	-0.44686	0.639342	0.859468	0.181854	0.822778	0.508615			CESC (n=306)	0.000718324	0.449428	2.62326e-16	2.34715e-29	0.00787868	1.71343e-71	5.46018e-16	1.92131e-43	1.22787e-25	1.29739e-14	1.57704e-32	1.01179e-80	0.00301752	2.91007e-68	3.7066e-19
	CHOL (n=36)	-0.0662719	0.0756682	0.213638	0.443435	0.387685	0.171216	0.107406	0.62145	0.396775	-0.618374	0.252829	-0.0385218	0.400085	0.38928	0.499903			CHOL (n=36)	0.713572	0.678158	0.237216	0.0093992	0.0249641	0.346167	0.557723	9.64603e-05	0.021464	0.000106293	0.156948	0.833045	0.0203707	0.0243882	0.00283452
	COAD (n=458)	0.0123841	0.460729	0.444781	0.710488	0.309014	0.824644	0.548707	0.852929	0.548707	-0.638414	0.471764	0.870296	0.529135	0.786095	0.865628			COAD (n=458)	0.842222	1.88378e-15	2.22313e-14	1.05358e-42	2.91164e-07	2.50905e-68	1.68981e-22	1.15449e-77	1.68981e-22	6.1797e-47	3.15259e-16	1.79537e-84	9.81245e-21	6.44567e-58	1.45623e-82
	DLBC (n=48)	-0.200723	-0.0611343	0.605159	0.647489	0.378136	0.383689	0.458716	0.659322	0.00710591	-0.540284	0.244525	0.609649	-0.608589	0.34387	0.322688			DLBC (n=48)	0.227195	0.713572	4.08659e-05	7.51914e-06	0.0175991	0.0158927	0.0032375	4.4053e-06	0.96483	0.000362791	0.136568	3.47009e-05	3.60239e-05	0.0319731	0.045105
	ESCA (n=185)	-0.0768188	0.176913	0.37436	0.518215	0.255432	0.733323	0.462326	0.797196	0.434747	-0.450735	0.420424	0.832147	0.513436	0.618115	0.634068			ESCA (n=185)	0.326608	0.0206431	3.79868e-07	2.15132e-13	0.000715195	5.88868e-31	1.29354e-10	4.59644e-40	2.04437e-09	4.26979e-10	7.78855e-09	1.577e-46	3.87198e-13	7.23439e-20	4.05019e-21
	GBM (n=153)	-0.216744	-0.192178	0.363545	0.472387	0.219439	0.270985	0.262187	0.558394	0.456244	-0.387864	0.218057	0.438555	0.483791	0.22231	0.436255			GBM (n=153)	0.0132304	0.0283348	1.92702e-05	1.03268e-08	0.0121007	0.00176701	0.00252841	2.90771e-12	3.78371e-08	4.50173e-06	0.0126698	1.44586e-07	3.98658e-09	0.0110099	1.71372e-07
	HNSC (n=522)	-0.192015	0.174049	0.342946	0.587353	0.349942	0.843132	0.459349	0.776426	0.449559	-0.518212	0.559313	0.856077	0.318239	0.802345	0.679509			HNSC (n=522)	2.73565e-05	0.000146173	1.23698e-14	4.62601e-46	3.22533e-15	4.7494e-132	1.86739e-26	9.14158e-99	2.74174e-25	2.02577e-34	5.09067e-41	4.45267e-140	1.07552e-12	3.68457e-110	9.62572e-67
	HNSC-HPV- (n=422)	-0.195349	0.190003	0.366888	0.611316	0.372904	0.858428	0.501706	0.792888	0.442766	-0.537526	0.5709	0.857682	0.347878	0.824561	0.684			HNSC-HPV- (n=422)	0.0001183	0.000182646	8.21169e-14	1.62539e-41	2.92061e-14	1.40286e-115	2.66738e-26	3.8313e-86	3.84838e-20	1.21177e-30	3.19505e-35	3.27878e-115	1.77094e-12	6.46408e-99	1.85108e-55
	HNSC-HPV+ (n=98)	-0.14392	0.0844549	0.163173	0.42798	0.238505	0.759878	0.25835	0.667911	0.436101	-0.417467	0.516565	0.851299	0.210497	0.698058	0.633666			HNSC-HPV+ (n=98)	0.195375	0.452461	0.13983	4.2087e-05	0.0283125	1.63559e-17	0.0173386	1.90472e-12	2.92919e-05	6.80824e-05	3.70987e-07	1.58954e-25	0.0541065	6.94847e-14	5.48403e-11
	KICH (n=66)	0.257182	0.325444	0.124409	0.419721	0.333446	0.571685	0.472017	0.791287	0.44223	-0.45693	0.325718	0.725516	0.372799	0.433549	0.523675			KICH (n=66)	0.0440583	0.0100135	0.344704	0.000665943	0.0082158	1.0776e-06	0.00010217	1.0749e-14	0.00030926	0.000180789	0.00996435	1.7245e-11	0.00283452	0.000416534	1.18311e-05
	KIRC (n=533)	0.0491467	0.0754608	0.0332156	0.376244	0.428864	0.537099	0.205204	0.661284	0.593707	-0.489955	0.387732	0.655303	0.388985	0.546454	0.600039			KIRC (n=533)	0.313225	0.117374	0.494966	1.57922e-16	1.56532e-21	4.57949e-35	1.3812e-05	3.29315e-58	2.27747e-44	1.41971e-28	1.51719e-17	7.60993e-57	1.17888e-17	1.73597e-36	1.56156e-45
	KIRP (n=290)	0.207848	0.292851	0.0545065	0.245684	0.402816	0.761197	0.584369	0.801489	0.684793	-0.430848	0.644489	0.810508	0.681104	0.795547	0.334316			KIRP (n=290)	0.00102671	2.72425e-06	0.404854	9.50287e-05	3.63648e-11	4.09984e-49	1.77377e-24	5.01531e-58	2.72341e-36	9.76194e-13	5.48026e-31	2.65459e-60	9.08498e-36	1.31487e-56	6.58979e-08
	LGG (n=516)	0.0333537	0.0342608	0.22034	0.26958	0.301431	0.495474	0.516983	0.588661	0.407904	-0.453569	0.216969	0.447736	0.258537	0.475891	0.31105			LGG (n=516)	0.486368	0.475482	1.86958e-06	3.9792e-09	3.54319e-11	2.64905e-30	2.65904e-33	5.03904e-45	4.24628e-20	4.4544e-25	2.70461e-06	2.11815e-24	1.77909e-08	9.04565e-28	7.52563e-12
	LIHC (n=371)	-0.120781	0.0225838	0.0267424	0.381408	0.333918	0.417076	0.194141	0.634868	0.44651	-0.39115	0.171737	-0.193989	0.46071	0.435049	0.383345			LIHC (n=371)	0.0287467	0.687399	0.635424	4.87743e-13	3.93626e-10	1.51848e-15	0.000388493	1.5769e-39	7.36935e-18	1.10624e-13	0.00176787	0.000391107	4.64457e-19	6.2304e-17	3.65948e-13
	LUAD (n=515)	0.0807492	0.224064	0.166417	0.375307	0.425395	0.567802	0.400182	0.716067	0.514102	-0.465796	0.510232	0.712539	0.369675	0.630458	0.553497			LUAD (n=515)	0.0822982	8.25821e-07	0.000283445	1.6887e-17	1.47912e-22	1.42226e-42	6.75441e-20	2.54881e-77	7.15092e-34	2.60542e-27	2.62374e-33	2.98268e-76	5.61563e-17	5.66897e-55	4.16315e-40
	LUSC (n=501)	-0.0508968	0.240419	0.227765	0.515053	0.494019	0.702641	0.400338	0.7952	0.616745	-0.518248	0.604075	0.795708	0.335573	0.694069	0.636767			LUSC (n=501)	0.288405	1.84218e-07	8.23006e-07	5.89545e-33	4.66781e-30	5.90602e-71	2.60907e-19	1.31621e-103	2.29707e-50	2.06419e-33	7.72107e-48	8.44967e-104	1.20582e-13	1.37299e-68	1.35263e-54
	MESO (n=87)	-0.0433744	-0.0238758	0.386884	0.463696	0.210438	0.606386	0.0531988	0.470485	0.404405	-0.565937	0.509122	0.530734	0.232552	0.623101	0.529858			MESO (n=87)	0.704025	0.833849	0.000347956	1.21631e-05	0.0601372	1.4912e-09	0.641536	8.68455e-06	0.000172687	2.98785e-08	1.07208e-06	2.97913e-07	0.036958	3.82416e-10	3.13918e-07
	OV (n=303)	-0.144098	-0.0308249	0.152654	0.374519	0.451403	0.634524	0.39628	0.75396	0.590151	-0.646968	0.489549	0.788158	0.452971	0.600113	0.835696			OV (n=303)	0.0267378	0.641536	0.0188343	1.98086e-09	1.55193e-13	8.22056e-29	1.72984e-10	4.52152e-46	3.21966e-24	3.00936e-30	5.38307e-16	5.43225e-53	1.25079e-13	3.41814e-25	4.45892e-65
	PAAD (n=179)	0.0525502	0.293996	0.131163	0.359838	0.415071	0.571038	0.211963	0.669413	0.587589	-0.548861	0.6105	0.800288	0.418793	0.701304	0.752368			PAAD (n=179)	0.512799	0.000133548	0.0976871	2.17121e-06	2.98785e-08	8.98567e-16	0.00674355	4.78631e-23	7.93037e-17	1.88217e-14	2.20633e-18	1.34963e-38	2.17865e-08	4.77616e-26	9.35437e-32
	PCPG (n=181)	0.0562433	0.0583181	0.278241	0.406252	0.199157	0.652011	0.306269	0.714139	0.293156	-0.395478	0.269604	0.712005	0.516876	0.646291	0.645597			PCPG (n=181)	0.489082	0.475482	0.000369744	8.97375e-08	0.0119914	4.47725e-21	8.16751e-05	9.6116e-27	0.000168759	2.10781e-07	0.000568173	1.59595e-26	1.89444e-12	1.28139e-20	1.44862e-20
	PRAD (n=498)	0.0501427	0.17419	0.129449	0.417615	0.111126	0.601811	0.304797	0.69746	0.185055	-0.445621	0.235959	0.800162	0.218051	0.417601	0.103507			PRAD (n=498)	0.328394	0.000479155	0.010049	1.59264e-18	0.0272159	1.65409e-41	4.26979e-10	9.00477e-61	0.000203391	3.58978e-21	1.85184e-06	2.00564e-92	1.12269e-05	1.59264e-18	0.0398693
	READ (n=166)	0.17733	0.621926	0.36735	0.621902	0.260403	0.774125	0.650037	0.863808	0.529896	-0.718736	0.479553	0.869345	0.451918	0.678001	0.820265			READ (n=166)	0.105599	1.22598e-10	0.000492461	1.22598e-10	0.0158192	1.06754e-18	8.84816e-12	2.52084e-27	1.36746e-07	7.62226e-23	2.77436e-06	4.75897e-28	1.20914e-05	4.80245e-13	1.54759e-22
	SARC (n=260)	-0.36879	-0.287916	0.353318	0.478739	0.508133	0.673446	0.38712	0.760922	0.632405	-0.49099	0.55253	0.638686	0.477162	0.639013	0.816483			SARC (n=260)	5.28383e-09	7.64705e-06	2.52545e-08	5.54606e-15	5.48464e-17	6.89271e-33	7.3891e-10	1.90375e-46	4.9054e-28	8.51257e-16	2.09366e-20	1.00285e-28	7.00003e-15	9.27002e-29	1.46376e-58
	SKCM (n=471)	-0.25225	0.0506271	0.336284	0.595537	0.413994	0.718395	0.149238	0.675385	0.515244	-0.588057	0.368923	0.62701	0.211737	0.656361	0.730707			SKCM (n=471)	8.08244e-08	0.301222	3.48034e-13	2.49635e-44	7.23439e-20	1.93149e-72	0.00177996	4.89192e-61	1.17435e-31	5.40715e-43	8.99208e-16	2.39003e-50	7.83246e-06	1.31487e-56	3.94323e-76
	SKCM-Metastasis (n=368)	-0.245404	0.0472036	0.328251	0.574521	0.384359	0.680768	0.191538	0.667836	0.521197	-0.565245	0.317401	0.637508	0.162904	0.611637	0.703032			SKCM-Metastasis (n=368)	4.72163e-06	0.399182	4.79413e-10	8.90983e-32	1.54231e-13	1.39744e-48	0.000391107	3.70004e-46	1.77437e-25	1.34543e-30	1.92276e-09	5.87758e-41	0.00270111	6.2891e-37	4.7011e-53
	SKCM-Primary (n=103)	-0.46557	-0.271668	0.300572	0.484751	0.335375	0.671666	0.192223	0.542975	0.307668	-0.502583	0.383307	0.513243	0.276074	0.608357	0.650654			SKCM-Primary (n=103)	1.3433e-06	0.00718003	0.00274284	4.08747e-07	0.000752659	2.66471e-14	0.0599162	6.92324e-09	0.00213353	1.28425e-07	9.94399e-05	6.14247e-08	0.00625792	2.50155e-11	3.08319e-13
	STAD (n=415)	-0.0773864	0.207288	0.312818	0.611278	0.299696	0.733476	0.44683	0.844893	0.627318	-0.593505	0.546254	0.795799	0.592284	0.702462	0.842801			STAD (n=415)	0.146009	6.90333e-05	9.21612e-10	2.06709e-39	4.96521e-09	4.77702e-64	1.60599e-19	7.72034e-103	5.21993e-42	1.14302e-36	3.38563e-30	1.10012e-82	1.72775e-36	1.31487e-56	7.28786e-102
	TGCT (n=150)	0.199455	0.40711	0.329155	0.635719	0.652731	0.741309	0.15485	0.517858	0.709265	-0.779999	0.336046	0.620711	0.274675	0.625147	0.743195			TGCT (n=150)	0.0183386	5.1673e-07	6.8081e-05	1.42797e-17	9.73598e-19	2.66738e-26	0.0687845	3.84825e-11	3.06652e-23	1.22744e-30	4.63234e-05	1.33684e-16	0.00100052	6.99041e-17	1.7379e-26
	THCA (n=509)	0.117702	0.291455	0.332287	0.455223	0.399365	0.623286	0.00531398	0.648807	0.489307	-0.542473	0.27941	0.513534	0.153457	0.563603	0.452142			THCA (n=509)	0.011263	1.05836e-10	1.14189e-13	9.25995e-26	1.25176e-19	6.99632e-53	0.909822	1.48879e-58	4.44897e-30	6.64638e-38	6.50771e-10	1.86251e-33	0.000883872	1.98781e-41	2.12618e-25
	THYM (n=120)	0.337621	0.34947	0.303127	0.366321	0.405663	0.253506	0.42965	0.462508	0.177404	-0.386067	0.11515	0.566841	-0.155107	0.296737	0.386952			THYM (n=120)	0.000307917	0.000179741	0.00129576	8.15178e-05	1.07631e-05	0.00778082	2.66728e-06	3.31763e-07	0.0652593	3.05633e-05	0.239575	8.20504e-11	0.109164	0.00166703	2.92919e-05
	UCEC (n=545)	-0.0570028	0.0379598	0.489781	0.55312	0.278148	0.661696	0.115318	0.422286	0.257324	-0.56155	0.684687	0.764669	0.427019	0.691514	0.549666			UCEC (n=545)	0.613164	0.73282	2.07917e-06	4.10369e-08	0.0106213	4.83787e-12	0.30555	6.06444e-05	0.0183884	3.42148e-25	4.30152e-13	1.20487e-17	4.87433e-05	2.03185e-13	5.192e-08
	UCS (n=57)	-0.474956	-0.18974	0.437463	0.526442	0.122895	0.780212	0.549429	0.797559	0.637056	-0.378005	0.281453	0.882277	0.541817	0.60781	0.568517			UCS (n=57)	0.000438885	0.190399	0.0013753	7.41826e-05	0.402813	1.21542e-11	3.05677e-05	1.92104e-12	4.87691e-07	0.00660262	0.0468052	7.26604e-18	4.10276e-05	2.24464e-06	1.3812e-05
	UVM (n=80)	-0.0622324	0.101794	0.560242	0.647332	0.18178	0.537652	-0.0644329	0.784269	0.551788	-0.625954	0.753017	0.627622	0.085883	0.800165	0.664199			UVM (n=80)	0.606987	0.401091	2.01739e-07	3.96288e-10	0.125984	7.65047e-07	0.595581	8.75928e-17	3.3505e-07	2.17651e-09	7.00003e-15	1.92632e-09	0.477582	7.24274e-18	9.26551e-11

## Sheet: Neu
Coefficients									Adj.P
	cancer	Neutrophil_CIBERSORT	Neutrophil_CIBERSORT-ABS	Neutrophil_MCPCOUNTER	Neutrophil_QUANTISEQ	Neutrophil_TIMER	Neutrophil_XCELL			cancer	Neutrophil_CIBERSORT	Neutrophil_CIBERSORT-ABS	Neutrophil_MCPCOUNTER	Neutrophil_QUANTISEQ	Neutrophil_TIMER	Neutrophil_XCELL
	ACC (n=79)	0.114111	0.132441	-0.0383377	0.178962	0.143901	0.197237			ACC (n=79)	0.499391	0.42065	0.846334	0.272109	0.383286	0.219304
	BLCA (n=408)	0.0567495	0.116434	-0.053817	-0.0649506	0.625511	0.015155			BLCA (n=408)	0.43076	0.0781652	0.461967	0.373071	9.38912e-40	0.853786
	BRCA (n=1100)	0.120669	0.136717	-0.121479	0.0732398	0.536951	0.048597			BRCA (n=1100)	0.000668078	8.89448e-05	0.000614161	0.0685175	3.05022e-73	0.26594
	BRCA-Basal (n=191)	0.112759	0.130881	0.0761169	0.114005	0.553183	-0.0631787			BRCA-Basal (n=191)	0.282917	0.203574	0.481255	0.276425	2.67597e-14	0.571821
	BRCA-Her2 (n=82)	0.224183	0.235262	-0.179467	0.168133	0.548609	-0.124294			BRCA-Her2 (n=82)	0.153222	0.129681	0.273162	0.307049	4.39253e-06	0.459838
	BRCA-LumA (n=568)	0.00225628	0.0135941	-0.027034	0.0587894	0.530055	0.108463			BRCA-LumA (n=568)	0.968005	0.846334	0.689737	0.336084	2.92998e-37	0.0478192
	BRCA-LumB (n=219)	0.288085	0.307429	-0.195798	0.100308	0.626738	0.0929763			BRCA-LumB (n=219)	0.000271265	8.82903e-05	0.0242516	0.31789	3.35644e-21	0.358684
	CESC (n=306)	-0.0968875	-0.0497897	-0.105146	0.0752665	0.534989	-0.0295228			CESC (n=306)	0.240365	0.571821	0.196692	0.372105	8.13429e-21	0.761716
	CHOL (n=36)	-0.083416	0.0265816	-0.0147215	-0.0175065	0.193261	0.151661			CHOL (n=36)	0.76286	0.933328	0.957137	0.949926	0.421	0.550223
	COAD (n=458)	0.267004	0.318024	0.432616	0.170396	0.711406	0.210011			COAD (n=458)	4.87833e-05	5.60037e-07	5.93422e-13	0.017462	4.91109e-42	0.00205161
	DLBC (n=48)	0.265301	0.304606	0.223125	0.018307	0.477277	0.20045			DLBC (n=48)	0.219304	0.143448	0.309999	0.949268	0.00660651	0.370458
	ESCA (n=185)	-0.119468	-0.0639569	0.141925	-0.0312984	0.509167	-0.341329			ESCA (n=185)	0.241582	0.560052	0.152347	0.796604	2.89417e-12	1.92888e-05
	GBM (n=153)	-0.139061	-0.0468053	0.215016	0.0791441	0.187408	0.0206542			GBM (n=153)	0.236963	0.726965	0.0414802	0.52482	0.0856555	0.885574
	HNSC (n=522)	-0.129847	-0.0352805	0.0129075	0.232837	0.735643	-0.194755			HNSC (n=522)	0.0153332	0.583627	0.853786	1.31207e-06	1.48619e-82	8.76888e-05
	HNSC-HPV- (n=422)	-0.12967	-0.0263033	0.030877	0.265018	0.753227	-0.201089			HNSC-HPV- (n=422)	0.0341281	0.735291	0.689737	5.73417e-07	1.64559e-72	0.000271265
	HNSC-HPV+ (n=98)	-0.130246	-0.0845674	-0.118683	0.0850005	0.622012	-0.101677			HNSC-HPV+ (n=98)	0.383286	0.582803	0.421348	0.582803	7.09198e-10	0.506135
	KICH (n=66)	0.0292501	0.0702333	0.0978835	0.113625	0.155494	-0.0369748			KICH (n=66)	0.887651	0.719804	0.583627	0.532277	0.374337	0.853786
	KIRC (n=533)	0.200571	0.253049	0.06689	0.0169178	0.659558	-0.00234781			KIRC (n=533)	8.82903e-05	2.98521e-07	0.29699	0.828006	4.15682e-57	0.968005
	KIRP (n=290)	-0.0332147	0.0360345	-0.203961	0.0511508	0.55106	-0.090442			KIRP (n=290)	0.733477	0.710077	0.00420201	0.572047	8.13429e-21	0.296121
	LGG (n=516)	0.0667199	0.106141	-0.0612023	NA	0.299669	0.130325			LGG (n=516)	0.294193	0.0673291	0.336084	NA	2.14946e-10	0.0166396
	LIHC (n=371)	0.00528366	0.0527741	0.0251494	0.0331488	0.230539	-0.0387408			LIHC (n=371)	0.949926	0.490535	0.76286	0.689737	8.89448e-05	0.618041
	LUAD (n=515)	0.0600959	0.143374	0.0920325	0.0601619	0.497775	-0.0698077			LUAD (n=515)	0.336084	0.00592756	0.115541	0.336084	8.38308e-31	0.261904
	LUSC (n=501)	0.0720355	0.168683	0.187407	0.0796758	0.393137	0.0399454			LUSC (n=501)	0.252335	0.00100646	0.000216694	0.198322	5.04376e-18	0.550223
	MESO (n=87)	-0.0199182	0.00456174	-0.229986	0.18095	0.617803	0.0165374			MESO (n=87)	0.922	0.971012	0.0973692	0.22184	2.65885e-09	0.933328
	OV (n=303)	0.0979617	0.134529	0.255158	0.0224665	0.625837	0.0532051			OV (n=303)	0.262764	0.0973692	0.000257185	0.828216	3.51804e-27	0.570198
	PAAD (n=179)	0.143242	0.183458	0.0928209	0.150197	0.651612	0.0169131			PAAD (n=179)	0.158349	0.055695	0.385181	0.137084	6.46728e-21	0.893507
	PCPG (n=181)	-0.0472236	-0.0318592	0.141222	0.0976637	0.260748	0.0185964			PCPG (n=181)	0.692214	0.79988	0.171024	0.370458	0.00294597	0.885574
	PRAD (n=498)	0.0538437	0.0572502	-0.163484	0.032776	0.519484	0.0922556			PRAD (n=498)	0.426786	0.406695	0.00355056	0.655929	8.63792e-29	0.15615
	READ (n=166)	0.203471	0.239237	0.190982	0.0782408	0.573751	0.0395509			READ (n=166)	0.146136	0.0747653	0.175846	0.608734	2.89745e-08	0.825245
	SARC (n=260)	0.0744322	0.085272	0.135629	-0.0921089	0.570368	-0.0110652			SARC (n=260)	0.406695	0.336278	0.0973692	0.29699	2.78562e-21	0.92542
	SKCM (n=471)	-0.1046	-0.0994864	-0.0860292	0.0148069	0.539774	0.00485386			SKCM (n=471)	0.0781652	0.0973692	0.166398	0.846334	1.93175e-34	0.949926
	SKCM-Metastasis (n=368)	-0.00399498	-0.000780221	-0.0618298	0.0419282	0.532048	0.0431187			SKCM-Metastasis (n=368)	0.960386	0.988329	0.406695	0.582803	5.33494e-26	0.57503
	SKCM-Primary (n=103)	-0.0571315	-0.0468044	-0.159347	-0.165588	0.360703	-0.0817415			SKCM-Primary (n=103)	0.711291	0.76286	0.241582	0.221219	0.000936516	0.572047
	STAD (n=415)	0.0503433	0.125284	0.223873	0.150278	0.545936	-0.0398196			STAD (n=415)	0.490535	0.0507922	7.18962e-05	0.0133888	1.91115e-29	0.583627
	TGCT (n=150)	0.0387258	0.0387258	0.0854467	-0.194323	0.711129	0.185738			TGCT (n=150)	0.76286	0.76286	0.461967	0.0617739	1.02818e-22	0.0774326
	THCA (n=509)	0.101723	0.121577	-0.00251008	0.00607955	0.424704	-0.0839874			THCA (n=509)	0.0774472	0.0263653	0.968005	0.940665	1.37183e-21	0.162111
	THYM (n=120)	-0.109745	-0.108088	0.0290866	0.358295	0.13547	-0.0704631			THYM (n=120)	0.406695	0.409597	0.846334	0.000428978	0.29649	0.599842
	UCEC (n=545)	0.0386388	0.0453748	-0.23334	-0.179359	0.408851	0.121264			UCEC (n=545)	0.828206	0.796604	0.0856679	0.219304	0.000397922	0.417685
	UCS (n=57)	-0.0207849	-0.0166292	-0.0526282	0.413993	0.045731	-0.191502			UCS (n=57)	0.933328	0.949268	0.825245	0.00834053	0.846334	0.321601
	UVM (n=80)	-0.130507	-0.130507	0.400823	0.148603	-0.0692432	0.10457			UVM (n=80)	0.416515	0.416515	0.00139441	0.356889	0.694974	0.532277
