# Supplementary material for: Tumor Derived SIGLEC Family Genes May Play Roles in Tumor Genesis, Progression, and Immune Microenvironment Regulation
Source: Front Oncol. 2020 Nov 9;10:586820. doi: 10.3389/fonc.2020.586820 (PMC7681003; doi:10.3389/fonc.2020.586820)
Supplement: Supplementary file 3 [file Table_3.xlsx]

## Sheet: B cell
Coefficients																			Adj.P
	cancer	B cell memory_CIBERSORT	B cell memory_CIBERSORT-ABS	B cell memory_XCELL	B cell naive_CIBERSORT	B cell naive_CIBERSORT-ABS	B cell naive_XCELL	B cell plasma_CIBERSORT	B cell plasma_CIBERSORT-ABS	B cell plasma_XCELL	B cell_EPIC	B cell_MCPCOUNTER	B cell_QUANTISEQ	B cell_TIMER	B cell_XCELL	Class-switched memory B cell_XCELL				cancer	B cell memory_CIBERSORT	B cell memory_CIBERSORT-ABS	B cell memory_XCELL	B cell naive_CIBERSORT	B cell naive_CIBERSORT-ABS	B cell naive_XCELL	B cell plasma_CIBERSORT	B cell plasma_CIBERSORT-ABS	B cell plasma_XCELL	B cell_EPIC	B cell_MCPCOUNTER	B cell_QUANTISEQ	B cell_TIMER	B cell_XCELL	Class-switched memory B cell_XCELL
	ACC (n=79)	0.189354	0.190039	0.108149	-0.237406	-0.0277467	0.181387	-0.373227	-0.104391	-0.131865	0.0295046	0.13676	-0.100419	0.418515	0.145083	0.0555775				ACC (n=79)	0.167954	0.16681	0.453031	0.0774877	0.864984	0.187824	0.00315197	0.471354	0.35324	0.857154	0.334447	0.490273	0.000738505	0.303012	0.714297
	BLCA (n=408)	0.0823599	0.138527	0.214056	-0.0480507	0.0360549	0.108436	-0.401729	-0.0510501	0.0168395	0.164438	0.257789	0.232357	-0.088092	0.315012	0.161467				BLCA (n=408)	0.175622	0.0176959	0.00013419	0.449058	0.573677	0.068776	1.61801e-14	0.419693	0.81692	0.0040948	2.74229e-06	2.85645e-05	0.145271	4.98021e-09	0.00486109
	BRCA (n=1100)	0.155625	0.178615	0.211229	-0.233575	-0.0080161	0.177799	-0.382282	-0.163635	-0.00799617	0.163875	0.260738	0.303826	-0.012056	0.351549	0.286081				BRCA (n=1100)	4.10309e-06	9.63317e-08	1.59607e-10	1.04115e-12	0.856668	1.07452e-07	9.17507e-34	1.17295e-06	0.856668	1.15284e-06	1.15391e-15	4.85019e-21	0.778141	2.35085e-28	1.06268e-18
	BRCA-Basal (n=191)	0.168815	0.223323	0.277602	-0.19462	-0.0247334	0.212151	-0.396692	-0.146072	0.0093487	0.189399	0.163014	0.307291	0.058798	0.361718	0.390462				BRCA-Basal (n=191)	0.0499277	0.00760687	0.000683353	0.0223809	0.816759	0.0117824	3.59577e-07	0.0930717	0.932073	0.0264803	0.0585521	0.000142011	0.52908	4.61637e-06	5.83577e-07
	BRCA-Her2 (n=82)	0.0867989	0.116857	0.331748	-0.165498	0.135154	0.0724156	-0.361119	-0.134441	0.064896	0.341971	0.418064	0.505209	0.0841429	0.494135	0.40065				BRCA-Her2 (n=82)	0.556582	0.419693	0.0106409	0.238172	0.345074	0.62582	0.00475434	0.347235	0.664517	0.00805638	0.000815089	2.65149e-05	0.567323	4.25199e-05	0.00144368
	BRCA-LumA (n=568)	0.150901	0.168527	0.13248	-0.252126	-0.00633463	0.16199	-0.398845	-0.178842	-0.0525997	0.111582	0.203905	0.262541	-0.024557	0.297624	0.205931				BRCA-LumA (n=568)	0.00167031	0.000406948	0.00640841	4.27996e-08	0.919461	0.000706322	1.22525e-19	0.000162035	0.316337	0.0241737	1.34082e-05	9.97295e-09	0.656204	4.83357e-11	1.08755e-05
	BRCA-LumB (n=219)	0.0998267	0.11304	0.253119	-0.307897	-0.120414	0.163122	-0.232344	-0.066629	0.0564584	0.0859955	0.266875	0.172172	-0.101113	0.394737	0.213394				BRCA-LumB (n=219)	0.242174	0.179805	0.00119601	5.69761e-05	0.151859	0.046778	0.00322667	0.449058	0.527171	0.319361	0.000608836	0.0351739	0.237186	9.7627e-08	0.00739973
	CESC (n=306)	0.176825	0.21578	0.221682	-0.0894898	-0.0140464	0.189586	-0.267494	-0.0597084	0.0881033	0.279655	0.313759	0.29614	0.303705	0.504321	0.480349				CESC (n=306)	0.00777152	0.000928632	0.000658813	0.205542	0.864984	0.00406687	2.74095e-05	0.413843	0.213784	1.06279e-05	5.66143e-07	2.67944e-06	1.37797e-06	6.75031e-18	3.89359e-16
	CHOL (n=36)	0.256938	0.308447	0.418011	-0.330945	-0.167303	0.01282	0.0391786	0.144702	-0.000105001	0.430567	0.13836	0.243365	0.473491	0.337464	0.225525				CHOL (n=36)	0.204334	0.118384	0.0267056	0.0898769	0.426922	0.956073	0.871094	0.499268	0.999522	0.0219135	0.518018	0.232055	0.00987827	0.0834341	0.270776
	COAD (n=458)	0.0981886	0.120276	0.0678156	-0.109838	0.16772	0.0146876	-0.193303	0.109051	-0.0449222	0.386512	0.469457	0.363055	-0.201819	0.213677	0.0762039				COAD (n=458)	0.163049	0.0818373	0.349076	0.115256	0.0125114	0.860017	0.00344763	0.118153	0.548118	2.84718e-10	2.94841e-15	4.39587e-09	0.0021566	0.00108755	0.288542
	DLBC (n=48)	-0.491904	-0.154071	-0.383401	-0.197151	-0.0934716	-0.468127	0.000672664	0.0279826	-0.33651	-0.307353	-0.368694	-0.281641	-0.468046	-0.505028	-0.0295382				DLBC (n=48)	0.00302498	0.426922	0.0283652	0.298129	0.6421	0.00518046	0.999522	0.901809	0.0585476	0.0880196	0.0365851	0.121695	0.00518046	0.00215634	0.896372
	ESCA (n=185)	0.152167	0.170979	-0.023917	-0.21189	-0.0607371	0.0737957	-0.266302	-0.0811194	-0.167317	0.104088	0.105857	0.12459	0.170232	0.187549	0.147713				ESCA (n=185)	0.0746488	0.0433369	0.81814	0.010396	0.510343	0.416488	0.000939544	0.366335	0.0480926	0.238172	0.231282	0.151396	0.0443661	0.0252486	0.0838812
	GBM (n=153)	-0.0454318	-0.0231654	0.218207	-0.0254102	0.040802	-0.0825895	-0.318761	-0.210368	-0.237532	-0.172277	0.250587	0.0296028	0.482932	0.371741	0.178845				GBM (n=153)	0.671998	0.846756	0.0229842	0.831972	0.711862	0.426922	0.000494997	0.0287523	0.0123127	0.0790015	0.00777152	0.802161	1.64598e-08	3.24225e-05	0.067223
	HNSC (n=522)	0.0724629	0.123647	0.204597	0.0653714	0.123631	0.1765	-0.274024	0.0471104	-0.00600367	0.273818	0.402459	0.453423	-0.345264	0.393406	0.298281				HNSC (n=522)	0.167954	0.0141462	2.13116e-05	0.218746	0.0141462	0.000301361	4.98021e-09	0.387492	0.926764	5.03919e-09	4.41564e-19	1.53324e-24	4.58257e-14	3.03826e-18	1.35105e-10
	HNSC-HPV- (n=422)	0.0482526	0.0929396	0.146628	0.0472588	0.0982984	0.170154	-0.300344	-0.0075395	-0.109763	0.220721	0.37602	0.407719	-0.372399	0.363613	0.241705				HNSC-HPV- (n=422)	0.426922	0.107308	0.00805638	0.435897	0.0862734	0.00181514	6.58348e-09	0.91561	0.0536402	3.4845e-05	9.55363e-14	3.5218e-16	1.76532e-13	7.34918e-13	4.87659e-06
	HNSC-HPV+ (n=98)	0.0586863	0.115667	0.297729	0.0726704	0.176145	0.13047	-0.150586	0.146676	0.230723	0.360959	0.375441	0.517306	-0.207598	0.420835	0.407272				HNSC-HPV+ (n=98)	0.663364	0.367348	0.0110015	0.579708	0.155023	0.30474	0.232055	0.244284	0.0561597	0.00150207	0.000906315	1.16375e-06	0.0883084	0.000152597	0.000273015
	KICH (n=66)	-0.00825339	-0.00825339	0.293269	-0.248786	0.199648	0.0911042	-0.447152	-0.0903859	-0.16493	-0.031643	0.21244	0.0666066	0.551848	0.231287	0.136286				KICH (n=66)	0.95755	0.95755	0.0365851	0.0810768	0.170506	0.557839	0.000624103	0.560906	0.26712	0.856668	0.14254	0.671998	9.06706e-06	0.107792	0.366335
	KIRC (n=533)	0.0935882	0.104303	0.0396898	-0.151836	-0.0475824	0.217131	-0.194459	0.178395	-6.09654e-05	0.100458	0.433045	0.406684	-0.0322851	0.341037	0.337955				KIRC (n=533)	0.0796486	0.0486258	0.4896	0.00299926	0.399991	1.16827e-05	0.000102806	0.000406948	0.999522	0.0583454	6.81326e-21	2.35972e-18	0.573677	6.37158e-13	1.04115e-12
	KIRP (n=290)	0.226442	0.322377	0.361507	-0.117481	-0.00458465	0.315643	-0.454563	-0.158134	-0.141879	0.0379275	0.42162	0.290085	0.620624	0.529552	0.0786981				KIRP (n=290)	0.000782368	6.86508e-07	1.61275e-08	0.101152	0.956073	1.22104e-06	1.91448e-13	0.0239318	0.0448402	0.625524	1.61019e-11	1.01407e-05	5.4608e-27	1.35176e-18	0.288542
	LGG (n=516)	0.158894	0.176296	-0.00302846	-0.223547	-0.103174	0.0182401	-0.631588	-0.506354	-0.311774	-0.454232	0.00954877	-0.234862	0.195066	0.37569	0.25494				LGG (n=516)	0.00144368	0.000376808	0.95755	3.9945e-06	0.0469115	0.766132	8.47243e-52	2.06317e-30	3.10046e-11	5.67228e-24	0.880548	1.15284e-06	7.03689e-05	3.48866e-16	1.04028e-07
	LIHC (n=371)	0.0761088	0.0968708	0.140926	-0.152535	0.0712244	0.0669203	-0.0418543	0.084445	0.0105156	0.11184	0.484409	0.418619	0.337199	0.408103	0.205485				LIHC (n=371)	0.232055	0.119565	0.0197656	0.0108423	0.266364	0.296585	0.528172	0.178845	0.890205	0.0690532	3.75218e-20	7.3515e-15	1.12778e-09	4.10678e-14	0.000415092
	LUAD (n=515)	0.0797028	0.157505	0.0416565	-0.13746	-0.0357595	0.172718	-0.496758	-0.248362	-0.257238	0.0550156	0.120884	0.160557	-0.0616733	0.224579	0.183213				LUAD (n=515)	0.124961	0.00134311	0.447823	0.00564814	0.518018	0.000404978	4.39878e-30	1.46345e-07	4.71447e-08	0.30474	0.0165544	0.00104995	0.245677	2.45034e-06	0.000161134
	LUSC (n=501)	0.0157896	0.0715407	0.287962	0.0959399	0.212603	0.205194	-0.237511	0.0821509	0.106475	0.339668	0.39589	0.279141	0.1033	0.422148	0.318766				LUSC (n=501)	0.802161	0.179805	1.27425e-09	0.0668274	1.28356e-05	2.71526e-05	8.73842e-07	0.119752	0.040176	3.06949e-13	5.97294e-18	4.39587e-09	0.0469115	1.83512e-20	1.09058e-11
	MESO (n=87)	-0.12165	-0.0847399	-0.0346708	-0.223699	-0.171303	0.161658	-0.195529	-0.0596492	-0.069528	-0.0126048	0.12909	0.0916278	0.0554789	0.288397	0.233474				MESO (n=87)	0.35417	0.52908	0.819695	0.0719774	0.1786	0.208036	0.119752	0.664517	0.609476	0.935347	0.322988	0.497056	0.68865	0.0169649	0.0585476
	OV (n=303)	0.197752	0.226787	0.214258	-0.225814	-0.116708	-0.0538155	-0.389417	-0.136941	-0.0643368	0.149946	0.0298413	0.117453	0.0609715	0.434797	0.297146				OV (n=303)	0.00449044	0.000955226	0.00190064	0.00101022	0.110559	0.490273	1.62794e-09	0.0580326	0.40364	0.0366823	0.714297	0.108281	0.426922	7.3507e-12	8.75836e-06
	PAAD (n=179)	-0.0521758	0.0277165	0.264444	0.172565	0.283737	0.227153	-0.176488	0.148899	-0.100991	0.326239	0.415118	0.406036	-0.0561248	0.397643	0.262848				PAAD (n=179)	0.579708	0.792969	0.00141445	0.0469115	0.000567912	0.0070546	0.0418751	0.0898013	0.26712	5.47908e-05	1.07452e-07	2.24412e-07	0.554677	4.2926e-07	0.00150497
	PCPG (n=181)	0.125415	0.134872	0.188809	-0.188448	-0.0208734	0.0992022	-0.328188	0.128535	-0.20739	0.221409	0.441021	0.180065	0.406218	0.0775122	-0.00481509				PCPG (n=181)	0.165701	0.13266	0.0305032	0.0307993	0.846756	0.282048	6.05028e-05	0.154072	0.0165544	0.00983806	1.74671e-08	0.0400343	3.14032e-07	0.411269	0.958745
	PRAD (n=498)	0.246853	0.264663	0.189981	-0.0850467	0.226251	0.155361	-0.309722	0.0537819	-0.191482	0.37902	0.333292	0.414205	-0.0838781	0.19344	-0.0085025				PRAD (n=498)	1.8149e-06	2.63301e-07	0.000343246	0.133798	1.41736e-05	0.00396476	9.52776e-10	0.36101	0.000306827	1.74879e-14	3.04711e-11	2.49606e-17	0.1404	0.000263323	0.901809
	READ (n=166)	-0.14664	-0.111125	-0.205267	0.0736913	0.248888	-0.215761	-0.348197	-0.0231184	-0.144433	0.124101	0.268593	0.408692	-0.0180858	0.0661643	-0.0371934				READ (n=166)	0.242079	0.387492	0.0898769	0.573677	0.0367463	0.0742982	0.00216165	0.875458	0.249148	0.328805	0.0230248	0.000236951	0.903282	0.617912	0.801262
	SARC (n=260)	0.082008	0.102244	0.121207	-0.262332	-0.145793	0.232766	-0.390285	-0.283194	-0.171565	0.0173064	0.247396	0.0775863	-0.0983514	0.339427	0.163163				SARC (n=260)	0.282048	0.170551	0.100027	0.000129755	0.0448733	0.000782368	2.2158e-09	2.96407e-05	0.0165544	0.846756	0.000335834	0.309854	0.188709	3.28271e-07	0.0234048
	SKCM (n=471)	0.0249814	0.123915	0.227311	-0.0271317	0.0585668	0.28297	-0.00554791	0.17992	0.170148	0.289644	0.313199	0.320642	-0.0424335	0.365365	0.336187				SKCM (n=471)	0.670226	0.0181189	4.5052e-06	0.6421	0.292291	5.56146e-09	0.933864	0.000386091	0.000815089	2.28325e-09	7.02374e-11	2.26231e-11	0.45585	1.11083e-14	1.74985e-12
	SKCM-Metastasis (n=368)	-0.0538709	0.0438168	0.136104	-0.0902798	-0.0155268	0.180884	-0.0773021	0.116964	0.0695605	0.171932	0.167077	0.222051	-0.0929418	0.259422	0.217588				SKCM-Metastasis (n=368)	0.40364	0.503438	0.0229308	0.143036	0.831972	0.0018095	0.2178	0.0530756	0.269923	0.00318802	0.00422917	9.82307e-05	0.130611	3.7985e-06	0.000140141
	SKCM-Primary (n=103)	0.102285	0.178544	0.206369	-0.0900169	-0.00341562	0.304428	0.0307184	0.138924	0.0793071	0.219931	0.40596	0.242391	-0.0706944	0.309523	0.377134				SKCM-Primary (n=103)	0.398674	0.119642	0.0686876	0.458406	0.97935	0.00482424	0.82376	0.237911	0.518018	0.0505009	9.15261e-05	0.0296948	0.565991	0.0040948	0.000335433
	STAD (n=415)	0.0610431	0.110749	0.259698	-0.139023	0.172119	0.230884	-0.127119	0.0822269	0.0198569	0.352906	0.38706	0.344353	0.194461	0.424562	0.32064				STAD (n=415)	0.319361	0.0583454	1.5744e-06	0.0156131	0.00215708	2.48247e-05	0.0283195	0.169661	0.774897	1.58252e-11	7.53948e-14	5.26208e-11	0.00047439	1.05895e-16	1.41169e-09
	TGCT (n=150)	0.107714	0.117919	0.195046	-0.0671059	0.177604	0.300408	-0.0349538	0.0913814	-0.0243616	0.452585	0.460191	0.435623	0.00722445	0.403727	0.380987				TGCT (n=150)	0.272078	0.228344	0.0366823	0.510343	0.0585476	0.000707764	0.750572	0.358136	0.831972	5.90074e-08	3.18429e-08	2.20902e-07	0.951408	2.08636e-06	9.19205e-06
	THCA (n=509)	0.380653	0.442087	0.377371	-0.0736093	0.0871479	0.145453	-0.3646	0.143661	0.00398283	0.446423	0.386879	0.47253	-0.327498	0.544149	0.595016				THCA (n=509)	6.08554e-17	4.20835e-23	1.16025e-16	0.163049	0.0930717	0.00344763	1.48528e-15	0.003936	0.951408	1.40636e-23	1.65257e-17	1.09275e-26	1.33359e-12	1.16699e-36	1.37628e-45
	THYM (n=120)	-0.00923927	0.186159	0.0154954	0.0538666	0.0613859	-0.0122154	-0.328921	-0.28884	-0.166015	0.208629	-0.0097228	0.0946374	-0.253283	-0.0180448	0.159708				THYM (n=120)	0.945572	0.0818373	0.905671	0.646093	0.596045	0.927835	0.00101557	0.00455034	0.123899	0.0487168	0.943008	0.405669	0.0147339	0.891282	0.141132
	UCEC (n=545)	0.213837	0.231943	0.276091	-0.45943	-0.284664	0.154562	-0.141411	0.0333418	0.122265	0.197645	0.362344	0.193349	0.342369	0.393994	0.437492				UCEC (n=545)	0.0809151	0.0561597	0.0207213	2.85645e-05	0.0165544	0.222381	0.26712	0.823682	0.344233	0.109106	0.00152058	0.118153	0.00302607	0.00049452	8.09558e-05
	UCS (n=57)	0.345554	0.354157	0.272996	-0.32165	-0.216448	-0.000667075	-0.281923	-0.0935659	-0.0812757	0.103278	0.119073	-0.0857929	0.104011	-0.113284	-0.096267				UCS (n=57)	0.0244066	0.020765	0.0838812	0.038198	0.180665	0.999522	0.074025	0.58626	0.6421	0.550834	0.4896	0.623402	0.548118	0.510343	0.575359
	UVM (n=80)	0.0823477	0.129829	0.00852653	-0.489747	-0.339879	0.00878789	-0.439229	0.151465	0.0471146	0.280781	0.273443	0.144502	-0.204144	0.265479	0.267931				UVM (n=80)	0.562761	0.347235	0.956073	2.70235e-05	0.0063107	0.956073	0.000238317	0.26712	0.760096	0.0283652	0.0335767	0.290848	0.122178	0.0396393	0.0375841

## Sheet: CD4 T
Coefficients																			Adj.P
	cancer	T cell CD4+ (non-regulatory)_QUANTISEQ	T cell CD4+ (non-regulatory)_XCELL	T cell CD4+ central memory_XCELL	T cell CD4+ effector memory_XCELL	T cell CD4+ memory activated_CIBERSORT	T cell CD4+ memory activated_CIBERSORT-ABS	T cell CD4+ memory resting_CIBERSORT	T cell CD4+ memory resting_CIBERSORT-ABS	T cell CD4+ memory_XCELL	T cell CD4+ naive_CIBERSORT	T cell CD4+ naive_CIBERSORT-ABS	T cell CD4+ naive_XCELL	T cell CD4+ Th1_XCELL	T cell CD4+ Th2_XCELL	T cell CD4+_EPIC	T cell CD4+_TIMER			cancer	T cell CD4+ (non-regulatory)_QUANTISEQ	T cell CD4+ (non-regulatory)_XCELL	T cell CD4+ central memory_XCELL	T cell CD4+ effector memory_XCELL	T cell CD4+ memory activated_CIBERSORT	T cell CD4+ memory activated_CIBERSORT-ABS	T cell CD4+ memory resting_CIBERSORT	T cell CD4+ memory resting_CIBERSORT-ABS	T cell CD4+ memory_XCELL	T cell CD4+ naive_CIBERSORT	T cell CD4+ naive_CIBERSORT-ABS	T cell CD4+ naive_XCELL	T cell CD4+ Th1_XCELL	T cell CD4+ Th2_XCELL	T cell CD4+_EPIC	T cell CD4+_TIMER
	ACC (n=79)	-0.180447	0.0839199	-0.12062	0.158775	0.194821	0.194821	-0.153977	0.29457	0.207493	-0.277265	-0.274698	0.061899	-0.234331	0.13882	-0.0524367	0.176944			ACC (n=79)	0.204485	0.569604	0.410348	0.274114	0.167883	0.167883	0.290764	0.027979	0.138321	0.040815	0.0429393	0.670606	0.0886132	0.342644	0.721339	0.216307
	BLCA (n=408)	-0.178686	0.0600367	-0.253677	0.127597	0.254755	0.283025	0.0724729	0.250113	0.151152	-0.276027	-0.270052	0.111362	0.106092	0.240349	-0.21983	0.172183			BLCA (n=408)	0.00200689	0.351178	5.16218e-06	0.0341441	4.66552e-06	2.85569e-07	0.256314	7.17329e-06	0.0102355	6.0264e-07	1.07499e-06	0.0686828	0.0841739	1.78011e-05	9.83326e-05	0.00294901
	BRCA (n=1100)	0.0337515	0.0640142	-0.0433334	0.318445	0.187239	0.194026	0.0670539	0.333793	0.273843	-0.0261769	-0.0262544	0.234888	-0.139522	0.085216	0.105792	0.187418			BRCA (n=1100)	0.389017	0.0858705	0.265268	3.83831e-23	2.8443e-08	8.53202e-09	0.0718515	1.69812e-25	3.8785e-17	0.503154	0.502431	1.13666e-12	4.97419e-05	0.0187028	0.00273651	2.8443e-08
	BRCA-Basal (n=191)	-0.137612	0.0972585	-0.0320505	0.254513	0.234667	0.262252	-0.0558381	0.21456	0.332104	-0.0325133	-0.0332482	0.279892	-0.0327418	0.106142	0.146831	0.0930562			BRCA-Basal (n=191)	0.125244	0.300412	0.731327	0.00238846	0.00551111	0.00170155	0.55397	0.0121875	3.94323e-05	0.727954	0.722838	0.000737084	0.726838	0.254698	0.0994374	0.324376
	BRCA-Her2 (n=82)	-0.117563	0.0660513	0.0905533	0.316319	0.227973	0.252141	0.148837	0.468688	0.307108	NA	NA	0.265772	-0.0320934	0.0288297	0.13489	0.136384			BRCA-Her2 (n=82)	0.427028	0.656484	0.538209	0.017824	0.100547	0.0686828	0.313202	0.000150272	0.0220745	NA	NA	0.0520542	0.828438	0.844891	0.359001	0.353847
	BRCA-LumA (n=568)	0.13807	0.0457663	-0.0894632	0.314729	0.152793	0.153748	0.0849194	0.334233	0.244414	-0.0314812	-0.0315175	0.217019	-0.206215	0.153792	0.0767343	0.194097			BRCA-LumA (n=568)	0.00502263	0.400748	0.0841739	4.15404e-12	0.0017536	0.0016424	0.0999919	1.11882e-13	1.6032e-07	0.564708	0.564708	4.04469e-06	1.33241e-05	0.0016424	0.142302	4.4304e-05
	BRCA-LumB (n=219)	-0.184592	-0.0374971	0.01108	0.364811	0.194195	0.199159	0.126964	0.288998	0.199118	-0.0785332	-0.0785332	0.20606	-0.0785179	0.0294182	0.06839	0.137803			BRCA-LumB (n=219)	0.0257285	0.671705	0.900201	1.44136e-06	0.0181796	0.0150186	0.139605	0.000208319	0.0150186	0.378572	0.378572	0.0113842	0.378572	0.736902	0.445648	0.104335
	CESC (n=306)	-0.351411	0.057883	-0.130605	0.258991	0.246877	0.275758	-0.138759	0.0523072	0.206479	-0.139074	-0.139074	0.493388	0.16997	0.0525827	-0.0352087	0.382277			CESC (n=306)	2.0588e-08	0.43885	0.0637851	6.04799e-05	0.000149745	1.79964e-05	0.0461557	0.485105	0.00193481	0.0456724	0.0456724	5.33249e-17	0.0123762	0.482983	0.639438	6.64693e-10
	CHOL (n=36)	0.253924	-0.00198131	-0.105353	0.3703	0.134285	0.134285	0.00876101	0.332093	0.215507	-0.147796	-0.147796	0.221617	-0.312521	0.00678246	0.188019	-0.0315223			CHOL (n=36)	0.224383	0.990987	0.632265	0.0615943	0.532241	0.532241	0.972278	0.0967435	0.314628	0.492139	0.492139	0.29967	0.121285	0.975347	0.378572	0.882557
	COAD (n=458)	-0.271956	-0.106978	-0.141649	0.0396163	0.0324571	0.0956165	-0.17133	0.467718	0.165226	-0.0557442	-0.0555655	0.302585	-0.243894	0.0617116	0.146119	0.274763			COAD (n=458)	2.57551e-05	0.136244	0.0429909	0.596251	0.66594	0.186934	0.0120001	5.12898e-15	0.0158833	0.457254	0.458301	2.26748e-06	0.000191694	0.409206	0.0359767	2.07968e-05
	DLBC (n=48)	-0.0348359	-0.00975986	-0.230092	0.306954	0.570209	0.630683	-0.151372	-0.153992	0.294792	-0.111706	-0.10988	-0.123922	0.107155	0.479145	0.185204	0.0588946			DLBC (n=48)	0.860216	0.967058	0.232248	0.0963479	0.000414786	4.89802e-05	0.44512	0.438795	0.112665	0.575452	0.580684	0.532241	0.587939	0.00471706	0.347198	0.76428
	ESCA (n=185)	-0.0940901	0.121202	-0.0517195	-0.00680371	0.178612	0.209538	-0.170809	0.248207	0.289435	-0.083911	-0.083911	0.287129	-0.0128022	0.0917712	0.0645104	0.144578			ESCA (n=185)	0.309798	0.176523	0.578677	0.947321	0.0383635	0.0128061	0.0476826	0.00261592	0.000345687	0.362214	0.362214	0.000393457	0.887092	0.323031	0.487953	0.0990374
	GBM (n=153)	-0.14319	-0.0441792	-0.0381112	0.314143	0.12703	0.126237	0.114046	0.310086	0.260345	-0.0511168	-0.0502685	0.208439	-0.212389	0.0074199	-0.0360708	0.240197			GBM (n=153)	0.163196	0.673424	0.721339	0.000738587	0.22239	0.224679	0.279437	0.000875214	0.00636808	0.635793	0.639438	0.0345061	0.0308085	0.948963	0.731327	0.0126971
	HNSC (n=522)	-0.295898	0.16361	-0.202628	0.0916795	0.202712	0.264107	0.143439	0.399105	0.291943	-0.158048	-0.157461	0.406777	0.0236762	0.134002	0.0823129	0.462666			HNSC (n=522)	3.26466e-10	0.00101111	3.12057e-05	0.0841739	3.11842e-05	2.8443e-08	0.00441476	1.05884e-18	6.02191e-10	0.00159647	0.00164905	2.08804e-19	0.6706	0.00837954	0.121912	1.26964e-25
	HNSC-HPV- (n=422)	-0.24993	0.12431	-0.163101	0.148147	0.16945	0.228843	0.178711	0.42143	0.281562	-0.152714	-0.152394	0.378657	0.0160211	0.114659	0.05983	0.441012			HNSC-HPV- (n=422)	2.84908e-06	0.0310019	0.00337677	0.00856483	0.00230675	2.07968e-05	0.00122332	3.24262e-17	9.88907e-08	0.00654925	0.00666103	8.91162e-14	0.793475	0.0476826	0.333666	6.7571e-19
	HNSC-HPV+ (n=98)	-0.329555	0.248377	-0.180909	-0.143874	0.171523	0.245144	0.00446506	0.246984	0.228121	-0.208571	-0.206956	0.443058	-0.0295226	0.11918	0.061726	0.483912			HNSC-HPV+ (n=98)	0.00493098	0.0432033	0.154952	0.273077	0.179943	0.0456724	0.97461	0.0441928	0.0671444	0.0945469	0.0971544	6.5076e-05	0.824148	0.36584	0.644282	9.31826e-06
	KICH (n=66)	0.0598968	-0.123377	-0.219227	0.137294	NA	NA	0.107496	0.574611	0.249824	-0.266298	-0.266298	0.0863826	-0.271359	0.115148	0.110407	0.196857			KICH (n=66)	0.699971	0.428961	0.139605	0.377247	NA	NA	0.491573	3.69711e-06	0.0875508	0.0676895	0.0676895	0.580684	0.0618764	0.460437	0.481379	0.189837
	KIRC (n=533)	-0.0987973	-0.119607	-0.122946	0.402594	0.0735093	0.0751617	-0.156698	0.231566	0.0888433	-0.0541535	-0.0541535	0.206136	-0.080589	0.320445	0.0493322	0.0694933			KIRC (n=533)	0.0710518	0.0252992	0.0209828	6.50295e-18	0.188654	0.178856	0.00248934	3.37641e-06	0.104335	0.347198	0.347198	4.16055e-05	0.146437	2.92671e-11	0.391212	0.218444
	KIRP (n=290)	0.0627514	0.126372	-0.24	0.48527	0.0645232	0.0645232	-0.305872	0.369659	0.259397	NA	NA	0.129409	-0.210167	0.189288	0.273829	0.284951			KIRP (n=290)	0.416517	0.08463	0.000414786	2.70125e-15	0.402915	0.402915	3.65241e-06	1.06333e-08	0.000114649	NA	NA	0.0775234	0.00234194	0.00669435	4.16055e-05	1.8531e-05
	LGG (n=516)	-0.0273655	-0.0700642	-0.191217	0.11852	0.0389883	0.0396938	0.404295	0.519068	0.0413877	-0.255584	-0.239034	-0.118271	0.078387	0.287411	-0.414406	0.768093			LGG (n=516)	0.634161	0.20421	0.000119054	0.0239209	0.491856	0.485105	1.05884e-18	3.13962e-32	0.466565	1.34125e-07	9.3235e-07	0.024127	0.150417	2.04406e-09	1.31547e-19	2.12383e-91
	LIHC (n=371)	0.0866214	0.0703939	-0.19895	0.1438	0.129245	0.132644	-0.0288747	0.310171	0.265383	-0.0183901	-0.0185938	0.284166	-0.0263261	0.301547	0.236126	0.137031			LIHC (n=371)	0.179943	0.289534	0.000787023	0.0193628	0.0381885	0.0327552	0.66594	4.08486e-08	3.73632e-06	0.781644	0.780282	6.19729e-07	0.690737	1.06821e-07	4.6514e-05	0.0267652
	LUAD (n=515)	-0.0977471	0.0536977	-0.131608	0.226614	0.00188655	0.0176055	0.0893544	0.403957	0.15075	-0.073739	-0.073739	0.196495	-0.243843	-0.119607	0.274961	0.0509641			LUAD (n=515)	0.0640782	0.335047	0.00972476	2.59991e-06	0.97461	0.747606	0.0909968	3.52092e-19	0.00261791	0.17178	0.17178	5.37457e-05	3.50408e-07	0.0202357	6.68774e-09	0.359001
	LUSC (n=501)	-0.0551774	0.0155685	-0.202584	0.257024	0.209256	0.244355	0.236241	0.489105	0.242893	-0.0938891	-0.0937093	0.212463	-0.136687	0.0755292	-0.00921136	0.0922236			LUSC (n=501)	0.329435	0.781644	4.1793e-05	1.17967e-07	2.21267e-05	5.37381e-07	1.32525e-06	3.68019e-28	6.19729e-07	0.0823524	0.0828724	1.66004e-05	0.00809657	0.168848	0.871398	0.0865387
	MESO (n=87)	-0.17404	-0.169881	-0.147292	0.252684	0.161079	0.158531	-0.262326	0.0899195	0.296642	NA	NA	0.123067	-0.110812	0.106596	-0.057302	0.22957			MESO (n=87)	0.183809	0.195512	0.273077	0.0441928	0.224383	0.232003	0.0359767	0.506363	0.0155185	NA	NA	0.362214	0.413835	0.433359	0.670606	0.0718515
	OV (n=303)	-0.128618	0.105214	0.0543684	0.330127	0.116249	0.116481	-0.188516	0.248778	0.133505	-0.129227	-0.129227	0.217109	0.0370846	0.00540325	0.0484511	0.111867			OV (n=303)	0.08463	0.167125	0.491219	7.40657e-07	0.120684	0.12004	0.00819024	0.000310014	0.0730446	0.084009	0.084009	0.00197351	0.639438	0.948963	0.535884	0.138321
	PAAD (n=179)	-0.0217743	0.0139551	-0.339703	-0.0109907	0.259455	0.261355	-0.0726898	0.53665	0.202607	0.153202	0.153202	0.378768	-0.466973	0.059291	0.281572	0.0843838			PAAD (n=179)	0.819023	0.882557	2.95067e-05	0.906698	0.00212571	0.00196356	0.44512	7.15073e-13	0.0202357	0.0880946	0.0880946	2.32686e-06	1.65553e-09	0.532241	0.000756312	0.374018
	PCPG (n=181)	0.0363857	0.0522653	-0.3527	0.259708	0.0431815	0.0440524	0.180541	0.595355	-0.0897139	-0.0622693	-0.0622693	-0.105824	-0.256421	-0.0404729	0.065146	0.254287			PCPG (n=181)	0.704349	0.587158	1.70085e-05	0.00238846	0.655464	0.647996	0.0441928	5.20998e-16	0.350043	0.516724	0.516724	0.266571	0.00271491	0.670606	0.496737	0.00294901
	PRAD (n=498)	0.159958	0.0720825	-0.184562	0.198212	0.00872908	0.00977802	0.156985	0.560393	0.188605	NA	NA	0.14318	-0.313405	0.0939515	0.180521	0.562425			PRAD (n=498)	0.00337677	0.225043	0.000623283	0.000204753	0.882936	0.871438	0.00414396	1.42395e-33	0.000451071	NA	NA	0.00972476	8.90043e-10	0.102892	0.000839349	9.4918e-34
	READ (n=166)	-0.242906	-0.104961	-0.196693	0.122297	-0.0204209	0.0252049	-0.384395	0.304645	0.0785249	-0.0310615	-0.0310615	0.246703	-0.312416	-0.0814428	0.249528	0.421091			READ (n=166)	0.0463963	0.427028	0.114993	0.351178	0.876312	0.8472	0.000737084	0.00990638	0.552209	0.813974	0.813974	0.0433821	0.00796768	0.535502	0.0410013	0.000161221
	SARC (n=260)	-0.175695	-0.0957057	-0.309192	0.35393	0.12804	0.129361	-0.0941543	0.233514	0.165932	-0.11983	-0.118135	0.204446	-0.0515787	0.209067	-0.0679037	0.400629			SARC (n=260)	0.015689	0.218444	5.23049e-06	1.22818e-07	0.0883457	0.0858705	0.225043	0.000890955	0.0238173	0.112874	0.118794	0.00414396	0.516724	0.00327401	0.391212	1.12303e-09
	SKCM (n=471)	-0.203008	0.0494755	-0.0873133	0.0919983	0.230709	0.273671	0.0179483	0.123596	0.50805	-0.0479536	-0.0411861	0.290671	-0.108932	0.319327	0.165271	0.273683			SKCM (n=471)	5.87861e-05	0.391212	0.113549	0.0939448	4.0055e-06	2.8443e-08	0.752104	0.0209153	2.08904e-29	0.408034	0.480364	3.06981e-09	0.0444932	4.27978e-11	0.00143939	2.8443e-08
	SKCM-Metastasis (n=368)	-0.104805	0.05263	-0.0234006	0.109167	0.25484	0.294967	-0.0314096	0.0678829	0.461974	-0.0356513	-0.0289716	0.281093	-0.0632822	0.286645	0.120999	0.193934			SKCM-Metastasis (n=368)	0.0931613	0.426294	0.721518	0.0819971	7.17329e-06	1.39183e-07	0.637856	0.301042	1.28358e-18	0.587698	0.661482	6.05446e-07	0.335686	3.42677e-07	0.0495128	0.00091745
	SKCM-Primary (n=103)	-0.284932	-0.0781913	-0.124556	0.137619	0.0410841	0.0678165	0.117793	0.198774	0.294692	-0.13835	-0.130314	0.227245	-0.155496	0.159814	0.25556	0.31865			SKCM-Primary (n=103)	0.0103155	0.528701	0.313202	0.259096	0.734262	0.583448	0.338973	0.0880946	0.0077768	0.256314	0.289534	0.0474666	0.193604	0.18006	0.0239209	0.00347688
	STAD (n=415)	-0.0607485	0.184906	-0.209476	0.0432291	0.2284	0.280116	-0.242391	0.388071	0.353959	0.0624459	0.0624459	0.460464	-0.21126	0.0663159	0.249464	0.208639			STAD (n=415)	0.338973	0.00110865	0.00017656	0.495798	3.71648e-05	2.54742e-07	1.06995e-05	8.91739e-14	2.13638e-11	0.324635	0.324635	1.31547e-19	0.000153283	0.295817	5.38711e-06	0.000188522
	TGCT (n=150)	-0.131315	-0.0204757	-0.258151	0.45335	-0.0734858	-0.0439123	0.312352	0.454156	0.476841	-0.101237	-0.100693	0.480791	-0.299137	0.0903512	0.238699	0.117411			TGCT (n=150)	0.186157	0.841627	0.00490074	8.11098e-08	0.478082	0.669703	0.000483271	7.69673e-08	1.19458e-08	0.324376	0.324635	8.62337e-09	0.000890955	0.377797	0.0101143	0.245562
	THCA (n=509)	-0.311867	0.0417841	-0.282633	0.368397	0.130209	0.130254	0.359364	0.719753	0.494434	-0.226963	-0.226409	0.252536	-0.171687	0.388986	0.239183	0.457111			THCA (n=509)	2.92671e-11	0.457254	2.68924e-09	9.16291e-16	0.0109427	0.0109427	5.32678e-15	1.47675e-76	1.98905e-29	2.82605e-06	2.95501e-06	1.39183e-07	0.000565522	1.278e-17	6.91723e-07	8.25023e-25
	THYM (n=120)	0.0641194	-0.0533099	-0.0829621	0.0899761	-0.0493917	-0.0421509	0.189215	0.290034	0.00500836	-0.184711	-0.0232246	0.0311044	-0.338028	-0.219162	0.161607	0.0791054			THYM (n=120)	0.581902	0.647996	0.479235	0.440256	0.6706	0.718544	0.08487	0.00504489	0.971513	0.0921672	0.841627	0.786338	0.00085606	0.0429393	0.146898	0.495798
	UCEC (n=545)	-0.349714	0.149108	0.102297	0.35165	0.2235	0.224231	-0.00224494	0.258184	0.184874	-0.131087	-0.132004	0.0647825	0.0358412	-0.0696684	-0.13905	0.450508			UCEC (n=545)	0.00273651	0.256314	0.444534	0.00261592	0.0748	0.07376	0.98657	0.0358909	0.146898	0.324376	0.323031	0.633157	0.786338	0.60208	0.294514	5.18276e-05
	UCS (n=57)	0.24291	0.345901	-0.0804432	0.158328	0.185872	0.185872	0.228204	0.446935	-0.00679683	0.0579586	0.0579586	0.10795	-0.170161	0.036025	-0.196425	0.0711847			UCS (n=57)	0.139812	0.0275151	0.644687	0.358905	0.277322	0.277322	0.169828	0.0026321	0.972278	0.733745	0.733745	0.532241	0.324376	0.836377	0.247993	0.676966
	UVM (n=80)	-0.17834	0.0267297	0.0736323	0.281102	-0.00164653	0.00278145	-0.0815071	0.106792	0.332914	-0.210227	-0.185493	0.286531	-0.44089	0.286085	0.357441	0.191853			UVM (n=80)	0.195999	0.84988	0.607422	0.031906	0.990233	0.985539	0.569604	0.456776	0.00885509	0.12004	0.178084	0.0281406	0.000258536	0.0283614	0.00441476	0.162864

## Sheet: CD8 T
Coefficients													Adj.P
	cancer	T cell CD8+ central memory_XCELL	T cell CD8+ effector memory_XCELL	T cell CD8+ naive_XCELL	T cell CD8+_CIBERSORT	T cell CD8+_CIBERSORT-ABS	T cell CD8+_EPIC	T cell CD8+_MCPCOUNTER	T cell CD8+_QUANTISEQ	T cell CD8+_TIMER	T cell CD8+_XCELL			cancer	T cell CD8+ central memory_XCELL	T cell CD8+ effector memory_XCELL	T cell CD8+ naive_XCELL	T cell CD8+_CIBERSORT	T cell CD8+_CIBERSORT-ABS	T cell CD8+_EPIC	T cell CD8+_MCPCOUNTER	T cell CD8+_QUANTISEQ	T cell CD8+_TIMER	T cell CD8+_XCELL
	ACC (n=79)	0.315035	0.219913	0.0195542	0.0958996	0.361624	-0.0678919	0.465359	0.23641	0.193861	0.146711			ACC (n=79)	0.0114868	0.0885732	0.891868	0.473337	0.00325736	0.6176	8.06824e-05	0.0648764	0.136465	0.266875
	BLCA (n=408)	0.378812	0.275766	-0.0448995	0.132714	0.457068	-0.0510498	0.416642	0.390273	0.233562	0.236836			BLCA (n=408)	2.78738e-13	2.48716e-07	0.446214	0.0184136	1.82299e-19	0.383396	4.47829e-16	4.36647e-14	1.54634e-05	1.15545e-05
	BRCA (n=1100)	0.401124	0.115526	0.136918	-0.00471203	0.291057	0.0510707	0.346845	0.349973	0.0934633	0.293597			BRCA (n=1100)	7.83501e-38	0.000567189	3.69891e-05	0.900049	6.69472e-20	0.145377	3.74319e-28	1.15805e-28	0.00581461	3.10831e-20
	BRCA-Basal (n=191)	0.434088	0.255935	0.249402	-0.0371367	0.257666	0.122177	0.344245	0.372142	0.0920268	0.375811			BRCA-Basal (n=191)	8.6195e-09	0.00135462	0.00182684	0.670252	0.00125904	0.145815	9.04469e-06	1.32543e-06	0.27786	1.00607e-06
	BRCA-Her2 (n=82)	0.545347	0.220296	0.201031	0.161922	0.461311	0.0381953	0.531379	0.532838	0.318607	0.501018			BRCA-Her2 (n=82)	2.22541e-06	0.0902654	0.126436	0.221886	0.000106721	0.781327	4.44353e-06	4.19812e-06	0.0110942	1.87997e-05
	BRCA-LumA (n=568)	0.369744	-0.00301785	0.0811722	-0.0394287	0.246088	0.0161764	0.338976	0.339431	0.132505	0.238029			BRCA-LumA (n=568)	2.31347e-17	0.957393	0.0930686	0.425159	5.12013e-08	0.753202	1.30705e-14	1.22836e-14	0.00474219	1.48286e-07
	BRCA-LumB (n=219)	0.295805	0.20722	0.119381	-0.00259254	0.242517	0.0905368	0.309566	0.234517	0.0353224	0.250954			BRCA-LumB (n=219)	7.52691e-05	0.00714057	0.135738	0.973965	0.00143781	0.263051	3.1559e-05	0.00213046	0.670252	0.000949954
	CESC (n=306)	0.55396	0.423208	0.134269	0.22659	0.539016	0.221081	0.379257	0.429909	0.410442	0.514197			CESC (n=306)	1.31048e-22	9.04703e-13	0.0399005	0.000322098	3.04144e-21	0.000460076	2.83994e-10	3.54002e-13	5.34506e-12	3.48102e-19
	CHOL (n=36)	0.319938	-0.010698	0.213968	0.0733029	0.253593	0.375913	0.371878	0.383512	0.463718	0.417248			CHOL (n=36)	0.0880616	0.960974	0.268045	0.716813	0.183867	0.0406993	0.0433096	0.0361448	0.00887309	0.0210676
	COAD (n=458)	0.382339	0.148358	-0.183052	-0.0470164	0.431575	-0.221196	0.28676	0.380471	0.39592	0.219892			COAD (n=458)	2.30041e-10	0.0226069	0.00435319	0.490107	3.45823e-13	0.000476263	3.87475e-06	2.83994e-10	4.34663e-11	0.000517123
	DLBC (n=48)	0.46885	0.454167	-0.244889	0.264307	0.508582	0.341366	0.330785	0.473197	0.388038	0.32772			DLBC (n=48)	0.00380543	0.00526574	0.162648	0.13186	0.001414	0.0448691	0.0524994	0.00344732	0.0203836	0.0548367
	ESCA (n=185)	0.226465	0.187221	0.0873901	0.101234	0.331059	-0.280716	0.346207	0.383738	0.30251	0.192654			ESCA (n=185)	0.00423818	0.0199131	0.296832	0.223884	1.47527e-05	0.000308762	5.43844e-06	3.42096e-07	8.73356e-05	0.0164273
	GBM (n=153)	0.170583	0.046007	-0.114673	-0.0606065	0.0789154	0.0159794	0.262504	-0.0135043	0.119931	-0.0958696			GBM (n=153)	0.0677886	0.641565	0.229057	0.532323	0.415505	0.879349	0.00373526	0.895696	0.207967	0.318441
	HNSC (n=522)	0.513222	0.334727	-0.0668037	0.194409	0.484921	-0.102539	0.598777	0.5491	-0.23099	0.415309			HNSC (n=522)	7.53034e-33	1.31844e-13	0.18106	3.5401e-05	5.82329e-29	0.0361448	6.86099e-47	4.30578e-38	7.01393e-07	6.3184e-21
	HNSC-HPV- (n=422)	0.481481	0.328386	-0.0826605	0.120801	0.435588	-0.22745	0.58448	0.509661	-0.208987	0.384206			HNSC-HPV- (n=422)	1.76709e-23	7.37534e-11	0.135738	0.0253198	4.57896e-19	1.15328e-05	2.56482e-36	1.37256e-26	6.17671e-05	9.63107e-15
	HNSC-HPV+ (n=98)	0.553528	0.294832	0.0118811	0.334762	0.579534	0.320883	0.578983	0.594509	-0.194064	0.467391			HNSC-HPV+ (n=98)	6.52786e-08	0.00887309	0.927548	0.00266015	1.03804e-08	0.00413331	1.0655e-08	3.3496e-09	0.0973835	1.05561e-05
	KICH (n=66)	0.303181	0.0779821	-0.166231	0.137691	0.425709	0.00184946	0.411817	0.239721	0.226236	0.132088			KICH (n=66)	0.0230032	0.586814	0.232845	0.327225	0.000870995	0.988334	0.00135462	0.0788947	0.0992374	0.346162
	KIRC (n=533)	0.426511	0.342772	0.0989463	0.1087	0.408697	0.469549	0.467555	0.456406	0.172589	0.387261			KIRC (n=533)	8.40157e-21	1.98747e-13	0.0512203	0.0311889	4.35395e-19	1.88255e-25	3.14956e-25	5.84117e-24	0.000436519	3.97538e-17
	KIRP (n=290)	0.470644	0.128876	0.0208151	0.125437	0.506002	-0.169577	0.578657	0.507976	0.434568	0.317485			KIRP (n=290)	7.62425e-15	0.0575819	0.773805	0.0648764	2.34888e-17	0.0110498	2.38028e-23	1.7448e-17	1.27535e-12	6.03545e-07
	LGG (n=516)	-0.0906654	-0.0697073	-0.0352425	-0.0698733	0.0369622	-0.503182	0.13883	0.0925553	-0.520834	0.0991737			LGG (n=516)	0.0694554	0.167369	0.49391	0.166727	0.473337	1.48017e-30	0.00441245	0.063873	5.45833e-33	0.0465859
	LIHC (n=371)	0.392981	0.158368	-0.0828738	0.0965498	0.396599	0.00586023	0.495315	0.4658	0.461348	0.286465			LIHC (n=371)	1.86895e-13	0.00581461	0.164287	0.103593	1.06565e-13	0.927548	1.03694e-21	4.35395e-19	1.0418e-18	2.03774e-07
	LUAD (n=515)	0.228636	0.0553857	-0.201142	-0.214696	0.150169	-0.0149282	0.191158	0.242981	0.240288	0.128389			LUAD (n=515)	9.03928e-07	0.270281	1.73563e-05	4.31839e-06	0.00168034	0.773805	4.7895e-05	1.59644e-07	2.19022e-07	0.00764433
	LUSC (n=501)	0.491362	0.270748	-0.113119	0.0991273	0.470773	0.0757067	0.501198	0.553603	0.38798	0.396607			LUSC (n=501)	5.82329e-29	7.40556e-09	0.0221156	0.0467944	1.84625e-26	0.135738	3.00984e-30	7.83501e-38	9.91419e-18	1.50523e-18
	MESO (n=87)	0.335984	0.179648	-0.0519162	-0.0584163	0.167143	0.0514194	0.306788	0.275718	0.0869719	0.262161			MESO (n=87)	0.00325736	0.136431	0.679484	0.641923	0.166155	0.681114	0.00764433	0.0182005	0.481651	0.0249761
	OV (n=303)	0.353345	0.047677	-0.100307	0.149384	0.36228	-0.173174	0.30373	0.293042	0.171203	0.135226			OV (n=303)	3.57419e-08	0.50571	0.153523	0.0293476	1.4509e-08	0.0107914	3.14136e-06	7.11696e-06	0.0116718	0.0502791
	PAAD (n=179)	0.444769	0.0890912	0.0877181	0.119787	0.531597	-0.00317074	0.563713	0.578924	0.651023	0.418669			PAAD (n=179)	4.48009e-09	0.299752	0.305942	0.158646	3.73305e-13	0.973965	6.12643e-15	6.95862e-16	5.74231e-21	4.35229e-08
	PCPG (n=181)	0.0899302	0.0892471	-0.16628	0.081776	0.441515	-0.0706927	0.485834	0.286329	0.0705856	-0.0431778			PCPG (n=181)	0.300334	0.303807	0.0486473	0.346162	9.1609e-09	0.419195	1.24331e-10	0.000393204	0.419195	0.628234
	PRAD (n=498)	0.27675	0.0416326	-0.117639	-0.0757774	0.51857	0.102372	0.265851	0.381375	0.0337268	0.23608			PRAD (n=498)	3.47202e-08	0.452446	0.0264074	0.162648	1.15805e-28	0.055236	1.28135e-07	4.6965e-15	0.54292	3.36289e-06
	READ (n=166)	0.24921	0.0623248	-0.110796	0.0287442	0.481647	-0.149506	0.165516	0.324861	0.300255	0.298467			READ (n=166)	0.0286782	0.609821	0.35017	0.814449	4.39755e-06	0.205931	0.158646	0.00344732	0.00730555	0.00764433
	SARC (n=260)	0.415821	0.254533	-0.0866537	0.113458	0.327814	-0.0222486	0.389217	0.339614	0.190213	0.250607			SARC (n=260)	5.82538e-11	0.000134228	0.224411	0.10833	5.18454e-07	0.767894	1.264e-09	1.80355e-07	0.00526574	0.000174861
	SKCM (n=471)	0.468494	0.213361	0.0987529	0.176236	0.490958	0.273439	0.513065	0.487594	0.192253	0.415362			SKCM (n=471)	3.85443e-25	1.12483e-05	0.0525547	0.000342848	8.09782e-28	1.0655e-08	1.48017e-30	2.08323e-27	8.4168e-05	1.50769e-19
	SKCM-Metastasis (n=368)	0.441436	0.254609	0.158706	0.200904	0.4639	0.245737	0.476524	0.466223	0.168864	0.383554			SKCM-Metastasis (n=368)	1.77838e-17	3.59e-06	0.00511475	0.00032164	2.26823e-19	7.94882e-06	1.76859e-20	1.48194e-19	0.00281449	3.74573e-13
	SKCM-Primary (n=103)	0.32439	-0.0332612	0.0305563	0.140031	0.395957	0.33588	0.403238	0.317166	0.169736	0.347105			SKCM-Primary (n=103)	0.0017874	0.773805	0.790093	0.206298	8.99213e-05	0.00118095	6.44805e-05	0.00232414	0.123644	0.000755527
	STAD (n=415)	0.533845	0.281888	0.0693172	0.129404	0.489614	0.0367904	0.437525	0.459031	0.735559	0.476185			STAD (n=415)	5.27219e-28	8.28226e-08	0.224733	0.0197221	3.80444e-23	0.527955	2.71883e-18	3.50916e-20	3.90258e-63	8.66889e-22
	TGCT (n=150)	0.521371	0.483004	-0.169343	-0.024303	0.361966	0.0897059	0.528163	0.429986	0.369932	0.533441			TGCT (n=150)	5.82538e-11	2.41416e-09	0.0599519	0.798077	1.71398e-05	0.331481	2.91922e-11	1.83926e-07	1.08007e-05	1.66213e-11
	THCA (n=509)	0.449031	0.217345	-0.20422	-0.0283719	0.57549	-0.182001	0.532767	0.542888	-0.435131	0.297664			THCA (n=509)	1.96483e-24	3.6853e-06	1.4264e-05	0.582784	2.95372e-42	0.000122895	1.75689e-35	5.36219e-37	7.03993e-23	8.56306e-11
	THYM (n=120)	0.234943	0.0636558	-0.131253	0.182378	0.525472	-0.0784368	-0.102238	-0.0921768	-0.212053	0.113899			THYM (n=120)	0.0194741	0.548493	0.207758	0.0742977	6.63806e-09	0.458596	0.329673	0.382686	0.0361448	0.276686
	UCEC (n=545)	0.384523	0.0759697	0.0902322	0.263931	0.475643	0.0561104	0.4355	0.500037	0.00405788	0.357556			UCEC (n=545)	0.000476001	0.532323	0.458094	0.0215196	7.84329e-06	0.649021	5.50346e-05	2.16525e-06	0.973965	0.00131135
	UCS (n=57)	0.0240213	-0.151111	-0.177723	-0.200441	0.128429	-0.226504	0.174369	0.154865	0.128628	-0.0575639			UCS (n=57)	0.888878	0.331481	0.253704	0.194339	0.415505	0.139532	0.263051	0.321183	0.415505	0.72194
	UVM (n=80)	0.521462	0.193663	0.280948	0.43452	0.60161	0.323258	0.754668	0.611894	0.190375	0.360755			UVM (n=80)	3.45417e-06	0.127508	0.0220193	0.000180725	2.66254e-08	0.00745231	1.30705e-14	1.273e-08	0.134581	0.00252352

## Sheet: DC
Coefficients														Adj.P
	cancer	Myeloid dendritic cell activated_CIBERSORT	Myeloid dendritic cell activated_CIBERSORT-ABS	Myeloid dendritic cell activated_XCELL	Myeloid dendritic cell resting_CIBERSORT	Myeloid dendritic cell resting_CIBERSORT-ABS	Myeloid dendritic cell_MCPCOUNTER	Myeloid dendritic cell_QUANTISEQ	Myeloid dendritic cell_TIMER	Myeloid dendritic cell_XCELL	Plasmacytoid dendritic cell_XCELL				cancer	Myeloid dendritic cell activated_CIBERSORT	Myeloid dendritic cell activated_CIBERSORT-ABS	Myeloid dendritic cell activated_XCELL	Myeloid dendritic cell resting_CIBERSORT	Myeloid dendritic cell resting_CIBERSORT-ABS	Myeloid dendritic cell_MCPCOUNTER	Myeloid dendritic cell_QUANTISEQ	Myeloid dendritic cell_TIMER	Myeloid dendritic cell_XCELL	Plasmacytoid dendritic cell_XCELL
	ACC (n=79)	-0.331308	-0.215541	0.40534	0.0239467	0.0298327	0.320659	0.0355444	0.488924	0.430592	0.406103				ACC (n=79)	0.00667709	0.0880617	0.000680551	0.857865	0.824965	0.00875787	0.791128	2.46354e-05	0.000282157	0.00066482
	BLCA (n=408)	-0.440779	-0.304903	0.7014	0.135295	0.195386	0.574613	-0.137595	0.461291	0.6082	0.439323				BLCA (n=408)	2.86717e-18	6.57078e-09	1.54868e-54	0.0140078	0.00031775	7.51533e-33	0.0124783	4.24327e-20	1.15335e-37	3.7617e-18
	BRCA (n=1100)	-0.149006	-0.139358	0.465649	0.163207	0.249207	0.522107	0.121909	0.530953	0.481311	0.331995				BRCA (n=1100)	5.37837e-06	2.2642e-05	1.94412e-53	5.63502e-07	6.0346e-15	5.31168e-69	0.000235671	1.09277e-71	1.70509e-57	3.04859e-26
	BRCA-Basal (n=191)	-0.138016	-0.114699	0.503371	0.203605	0.250116	0.612881	0.172854	0.492598	0.535692	0.475112				BRCA-Basal (n=191)	0.0904538	0.163412	4.76577e-12	0.0107857	0.00151729	1.17296e-18	0.0316114	1.63274e-11	9.69631e-14	1.06141e-10
	BRCA-Her2 (n=82)	-0.123372	-0.119006	0.562092	0.147588	0.194914	0.512155	0.102235	0.574158	0.488433	0.535516				BRCA-Her2 (n=82)	0.349235	0.365301	6.74518e-07	0.257408	0.127023	9.45379e-06	0.433059	3.33766e-07	2.86205e-05	2.9e-06
	BRCA-LumA (n=568)	-0.156459	-0.150134	0.448288	0.135377	0.230507	0.475769	0.127	0.527598	0.490599	0.290339				BRCA-LumA (n=568)	0.000655491	0.00109291	3.60421e-26	0.00336253	2.89808e-07	9.53829e-30	0.00611067	1.84829e-37	8.03084e-32	5.19255e-11
	BRCA-LumB (n=219)	-0.0681062	-0.0632505	0.4576	0.0672179	0.144838	0.395068	0.103422	0.506324	0.360923	0.272833				BRCA-LumB (n=219)	0.395632	0.423915	7.67872e-11	0.398289	0.0605414	3.7448e-08	0.185708	2.44877e-13	6.60745e-07	0.000256363
	CESC (n=306)	-0.442787	-0.292682	0.733115	0.339207	0.428011	0.594952	-0.0902761	0.71616	0.6379	0.441897				CESC (n=306)	3.80699e-14	1.69589e-06	6.95104e-47	1.87585e-08	3.27069e-13	3.87552e-27	0.165035	8.06098e-44	3.38874e-32	4.322e-14
	CHOL (n=36)	0.326564	0.336012	0.619354	0.567129	0.604331	0.63385	0.0988199	0.59228	0.71303	0.423384				CHOL (n=36)	0.0739204	0.0649135	0.000150102	0.000687283	0.000242759	9.21701e-05	0.610292	0.000347369	3.51356e-06	0.0164885
	COAD (n=458)	-0.197077	-0.169275	0.798105	-0.0141493	0.0754003	0.757613	0.0862829	0.788149	0.794941	0.10079				COAD (n=458)	0.0017537	0.00762113	1.14015e-60	0.836322	0.254097	2.54246e-51	0.185708	3.47579e-58	7.12489e-60	0.120804
	DLBC (n=48)	-0.0269034	-0.0272953	0.181602	0.394987	0.393639	0.406751	0.143695	0.686608	-0.182457	0.448338				DLBC (n=48)	0.876201	0.876201	0.300336	0.0156748	0.0159894	0.0125787	0.412592	1.7013e-06	0.29943	0.00535736
	ESCA (n=185)	-0.247872	-0.0682576	0.678851	0.225227	0.26586	0.575422	-0.128702	0.598348	0.66233	0.0664409				ESCA (n=185)	0.00138596	0.40536	6.41284e-25	0.00387686	0.000583893	1.23058e-16	0.108552	3.27206e-18	2.30315e-23	0.416322
	GBM (n=153)	0.124719	0.136125	0.0800308	-0.0267246	-0.0224965	0.393732	-0.0147539	0.544116	0.327957	0.319267				GBM (n=153)	0.179927	0.141073	0.398289	0.784149	0.818831	4.40291e-06	0.876201	2.03267e-11	0.000185695	0.000282157
	HNSC (n=522)	-0.28988	-0.137373	0.665572	0.0348355	0.220683	0.607567	0.084988	0.311904	0.674033	0.405432				HNSC (n=522)	1.66789e-10	0.00371598	7.33161e-63	0.4819	1.80593e-06	7.81515e-50	0.0790697	4.76777e-12	5.78712e-65	3.41936e-20
	HNSC-HPV- (n=422)	-0.242051	-0.0917614	0.653637	0.00693159	0.180114	0.590284	0.0896761	0.355688	0.653674	0.347921				HNSC-HPV- (n=422)	2.24311e-06	0.0879685	5.20001e-49	0.896843	0.000559571	5.66019e-38	0.0942961	7.8777e-13	5.20001e-49	2.66671e-12
	HNSC-HPV+ (n=98)	-0.485201	-0.3593	0.647919	0.194689	0.349547	0.626661	0.0641068	0.308063	0.710378	0.534345				HNSC-HPV+ (n=98)	3.3197e-06	0.000975859	2.1455e-11	0.0883853	0.00137859	1.52707e-10	0.590681	0.00538426	2.4605e-14	1.74306e-07
	KICH (n=66)	-0.316279	-0.225967	0.758439	0.0403288	0.0445602	0.690512	0.127124	0.745297	0.547218	0.357795				KICH (n=66)	0.0152475	0.0911441	8.59778e-13	0.779119	0.756819	5.77754e-10	0.358907	3.57e-12	5.38527e-06	0.00555146
	KIRC (n=533)	-0.188091	-0.181882	0.523635	0.258571	0.272533	0.529406	0.11547	0.685278	0.561184	0.326614				KIRC (n=533)	0.000101114	0.000175274	6.07166e-33	4.64395e-08	7.47456e-09	9.06181e-34	0.0189715	9.61556e-64	1.19592e-38	2.15614e-12
	KIRP (n=290)	-0.112268	-0.101637	0.642689	0.211204	0.223323	0.710093	0.104843	0.729593	0.625236	0.356757				KIRP (n=290)	0.0928129	0.129758	1.22963e-30	0.00113004	0.000568247	6.5577e-40	0.118081	3.853e-43	1.3513e-28	1.01146e-08
	LGG (n=516)	0.106753	0.111636	0.698266	0.143006	0.14879	0.500758	0.167377	0.78306	0.0105285	0.253353				LGG (n=516)	0.027815	0.0209884	1.80145e-69	0.00286662	0.00188517	7.07422e-31	0.000455923	4.14413e-98	0.837345	5.06884e-08
	LIHC (n=371)	-0.123774	-0.123642	0.504024	0.136955	0.214925	0.650638	0.062167	0.631507	0.516597	0.234055				LIHC (n=371)	0.0304189	0.0305091	6.65956e-23	0.0159894	0.000118874	6.38511e-42	0.29551	7.94013e-39	3.40627e-24	2.43405e-05
	LUAD (n=515)	-0.131467	-0.0622094	0.573897	0.385801	0.451852	0.582942	-0.14727	0.668405	0.718811	0.25964				LUAD (n=515)	0.0055624	0.201842	1.65644e-43	2.77142e-18	1.98533e-25	3.63002e-45	0.00178383	1.09199e-63	9.95473e-78	1.33243e-08
	LUSC (n=501)	-0.271474	-0.181839	0.665138	0.145287	0.256836	0.616985	-0.046608	0.581132	0.69582	0.469045				LUSC (n=501)	4.74614e-09	0.000134475	7.22595e-61	0.00244845	3.36313e-08	3.32331e-50	0.357297	2.01575e-43	9.99263e-69	1.06742e-26
	MESO (n=87)	-0.158366	-0.149996	0.155991	0.0685819	0.0754424	0.390261	-0.0524752	0.426995	0.415197	0.281904				MESO (n=87)	0.180912	0.20455	0.185708	0.57317	0.531583	0.000429371	0.66867	9.67561e-05	0.000159551	0.0134486
	OV (n=303)	-0.197151	-0.148718	0.642724	0.208329	0.212933	0.558199	-0.232878	0.567361	0.512798	0.367693				OV (n=303)	0.00293785	0.026925	1.31933e-29	0.0016307	0.00126734	4.38954e-21	0.000406603	6.78598e-22	1.84641e-17	6.15215e-09
	PAAD (n=179)	0.029178	0.0713393	0.573041	0.174939	0.268897	0.770524	-0.0337501	0.770308	0.73176	0.0716193				PAAD (n=179)	0.738197	0.398289	1.03798e-15	0.0310903	0.000680636	5.69511e-34	0.694369	5.98225e-34	3.8349e-29	0.398289
	PCPG (n=181)	-0.262355	-0.191275	0.573464	0.157758	0.157731	0.492731	0.173981	0.49307	0.58556	0.084239				PCPG (n=181)	0.00109291	0.019151	2.17013e-15	0.0563567	0.0563567	4.1732e-11	0.0342651	4.07457e-11	3.84111e-16	0.323847
	PRAD (n=498)	0.00445459	0.0263136	0.647513	0.136041	0.212562	0.751121	0.0957237	0.683023	0.533513	0.0396773				PRAD (n=498)	0.93251	0.628873	1.11036e-49	0.00843689	2.64319e-05	6.4191e-75	0.068191	3.37594e-57	3.86373e-31	0.461309
	READ (n=166)	-0.451992	-0.393708	0.801184	0.192202	0.25193	0.752674	-0.0203473	0.776239	0.745774	0.0807405				READ (n=166)	1.70391e-05	0.000246972	1.27724e-20	0.0904538	0.02377	5.03174e-17	0.864233	1.17296e-18	1.40237e-16	0.489975
	SARC (n=260)	-0.0588834	-0.044108	0.549867	0.117725	0.131685	0.452237	0.0453412	0.683338	0.630707	0.346394				SARC (n=260)	0.403315	0.531583	5.38609e-20	0.0877664	0.0543056	3.75399e-13	0.521439	5.3757e-34	1.08854e-27	7.13254e-08
	SKCM (n=471)	-0.150028	-0.148954	0.49305	0.0366413	0.122723	0.617352	-0.115982	0.422334	0.403774	0.37837				SKCM (n=471)	0.00220571	0.00237145	1.39764e-28	0.476456	0.0130144	2.83104e-48	0.0189715	1.71519e-20	1.13123e-18	2.17082e-16
	SKCM-Metastasis (n=368)	-0.00184111	-0.00140468	0.417941	0.0824253	0.148552	0.589577	-0.109136	0.433836	0.385114	0.375911				SKCM-Metastasis (n=368)	0.974914	0.97899	8.54924e-16	0.15175	0.00792887	1.24104e-33	0.0545315	4.77581e-17	2.12702e-13	8.59778e-13
	SKCM-Primary (n=103)	-0.216301	-0.211387	0.465122	0.150487	0.253724	0.506692	-0.263958	0.246489	0.439463	0.163741				SKCM-Primary (n=103)	0.0402115	0.0452141	1.97186e-06	0.163071	0.0150221	1.3985e-07	0.0112029	0.0182395	8.53812e-06	0.126456
	STAD (n=415)	-0.230597	-0.149195	0.692941	0.287126	0.364613	0.746381	0.0376873	0.791477	0.7871	0.338483				STAD (n=415)	1.26955e-05	0.00577748	2.70109e-54	3.3626e-08	8.04725e-13	3.90675e-67	0.505064	1.26803e-80	3.22753e-79	4.07457e-11
	TGCT (n=150)	-0.232014	-0.232416	0.563428	0.176728	0.234296	0.576191	0.412548	0.570246	0.489031	0.231823				TGCT (n=150)	0.0073755	0.00728891	3.8462e-13	0.0444128	0.00679616	8.41884e-14	5.13389e-07	1.7422e-13	9.53898e-10	0.00740159
	THCA (n=509)	-0.0679816	0.0223477	0.817635	0.506311	0.58535	0.400819	-0.277777	0.61088	0.790035	0.244011				THCA (n=509)	0.165035	0.658802	5.17674e-116	2.84041e-32	3.63002e-45	1.40983e-19	1.23124e-09	4.26842e-50	4.85482e-103	1.21956e-07
	THYM (n=120)	-0.164179	-0.164179	0.107169	0.0932672	0.328522	-0.105635	0.253734	-0.0329504	0.202048	0.055594				THYM (n=120)	0.101803	0.101803	0.29943	0.366619	0.000628013	0.305746	0.00955114	0.757083	0.0419473	0.593906
	UCEC (n=545)	-0.565739	-0.510832	0.58215	0.373808	0.380874	0.609286	-0.0506862	0.226228	0.446219	0.372606				UCEC (n=545)	2.49298e-08	8.80846e-07	7.47456e-09	0.000623906	0.000481058	8.75191e-10	0.672897	0.0465765	2.81737e-05	0.00064827
	UCS (n=57)	-0.172317	-0.141903	0.729568	0.199903	0.200789	0.673891	0.153382	0.475667	0.471652	-0.0790873				UCS (n=57)	0.258127	0.357491	1.65111e-09	0.184085	0.182401	8.1926e-08	0.31753	0.000598195	0.00066482	0.610292
	UVM (n=80)	NA	NA	0.657125	0.252987	0.357097	0.791313	0.10269	-0.128049	0.543733	0.358233				UVM (n=80)	NA	NA	2.5372e-10	0.0367753	0.00240521	4.70341e-17	0.415961	0.311718	7.75503e-07	0.00233601

## Sheet: M
Coefficients																			Adj.P
	cancer	Macrophage M0_CIBERSORT	Macrophage M0_CIBERSORT-ABS	Macrophage M1_CIBERSORT	Macrophage M1_CIBERSORT-ABS	Macrophage M1_QUANTISEQ	Macrophage M1_XCELL	Macrophage M2_CIBERSORT	Macrophage M2_CIBERSORT-ABS	Macrophage M2_QUANTISEQ	Macrophage M2_TIDE	Macrophage M2_XCELL	Macrophage_EPIC	Macrophage_TIMER	Macrophage_XCELL	Macrophage/Monocyte_MCPCOUNTER				cancer	Macrophage M0_CIBERSORT	Macrophage M0_CIBERSORT-ABS	Macrophage M1_CIBERSORT	Macrophage M1_CIBERSORT-ABS	Macrophage M1_QUANTISEQ	Macrophage M1_XCELL	Macrophage M2_CIBERSORT	Macrophage M2_CIBERSORT-ABS	Macrophage M2_QUANTISEQ	Macrophage M2_TIDE	Macrophage M2_XCELL	Macrophage_EPIC	Macrophage_TIMER	Macrophage_XCELL	Macrophage/Monocyte_MCPCOUNTER
	ACC (n=79)	-0.17406	-0.145773	0.179553	0.253117	0.194644	0.401532	0.429659	0.810441	0.437941	-0.213371	0.364077	0.392199	0.574362	0.481316	0.807027				ACC (n=79)	0.156459	0.23791	0.143586	0.0367956	0.111762	0.000597361	0.000214817	1.03263e-17	0.000156912	0.0806623	0.00206693	0.000825401	1.92393e-07	2.51e-05	1.79448e-17
	BLCA (n=408)	0.0557711	0.193261	0.28828	0.460305	0.506377	0.708309	0.362993	0.770414	0.566622	-0.40708	0.487617	0.756444	0.268095	0.702142	0.58478				BLCA (n=408)	0.305276	0.000274188	3.3422e-08	3.23887e-20	8.43353e-25	2.44311e-56	1.50151e-12	2.6138e-72	5.89507e-32	1.03278e-15	7.85162e-23	2.4582e-68	3.14373e-07	5.66908e-55	2.12144e-34
	BRCA (n=1100)	0.0245137	0.191202	0.0663858	0.34929	0.430613	0.504645	0.135112	0.691196	0.522478	-0.420775	0.571038	0.701342	0.293124	0.655958	0.698126				BRCA (n=1100)	0.459535	2.42866e-09	0.0433078	2.89523e-29	2.7067e-45	2.74844e-64	2.95349e-05	8.54061e-140	1.46328e-69	4.13783e-43	9.23178e-86	3.11964e-145	1.18144e-20	2.47771e-121	1.2448e-143
	BRCA-Basal (n=191)	-0.0110392	0.251266	0.150647	0.427703	0.471649	0.635329	0.13738	0.634203	0.617751	-0.478841	0.483561	0.707459	0.201616	0.70561	0.747641				BRCA-Basal (n=191)	0.890989	0.00112463	0.0557891	7.68739e-09	1.05775e-10	1.44074e-20	0.0813683	1.76408e-20	3.17167e-19	4.96518e-11	2.97961e-11	4.16232e-27	0.00970621	6.49133e-27	1.0236e-31
	BRCA-Her2 (n=82)	-0.113617	0.219197	0.11235	0.535418	0.32807	0.620056	0.0497066	0.627549	0.557325	-0.456803	0.449068	0.751816	0.283157	0.701563	0.471218				BRCA-Her2 (n=82)	0.362512	0.074644	0.367634	2.07681e-06	0.00636711	1.21719e-08	0.693423	7.13624e-09	6.32119e-07	8.2665e-05	0.000112858	6.60817e-14	0.019485	1.43826e-11	4.48305e-05
	BRCA-LumA (n=568)	0.113499	0.213207	0.03374	0.314429	0.438845	0.479783	0.118457	0.68343	0.578113	-0.450212	0.603632	0.709025	0.35081	0.644988	0.79693				BRCA-LumA (n=568)	0.0121487	1.65985e-06	0.462455	5.80963e-13	3.56031e-25	1.81926e-30	0.00896681	3.5346e-71	1.4833e-46	1.45544e-26	1.0078e-51	7.43147e-79	5.31055e-16	4.04469e-61	5.35321e-113
	BRCA-LumB (n=219)	-0.138344	0.0693736	-0.0487388	0.23344	0.3517	0.586722	0.298703	0.71274	0.576502	-0.320102	0.618193	0.729131	0.284385	0.733825	0.672872				BRCA-LumB (n=219)	0.0651068	0.359999	0.518424	0.00151269	9.60624e-07	1.09133e-18	3.93652e-05	1.95663e-30	5.9751e-18	9.51967e-06	4.08591e-21	1.97159e-32	9.57084e-05	4.93732e-33	4.51694e-26
	CESC (n=306)	-0.159492	0.0322159	0.461892	0.647652	0.179578	0.699281	0.419786	0.762312	0.662133	-0.303165	0.541668	0.831365	0.227585	0.72875	0.518528				CESC (n=306)	0.0099265	0.609673	1.22813e-15	1.27642e-33	0.00354837	3.46798e-41	6.90289e-13	5.79358e-53	1.43665e-35	4.70774e-07	5.35015e-22	6.42829e-71	0.000193637	2.91186e-46	5.48592e-20
	CHOL (n=36)	-0.20863	0.00362575	-0.0195605	0.262839	0.20774	0.492953	0.123225	0.699067	0.572525	-0.418942	0.277063	0.0901556	0.546213	0.402655	0.313882				CHOL (n=36)	0.248549	0.983508	0.912718	0.142323	0.249406	0.00345242	0.498103	4.83844e-06	0.000455489	0.0149978	0.120801	0.622071	0.00094219	0.0200964	0.0768235
	COAD (n=458)	0.120963	0.56874	0.324366	0.630267	0.346471	0.845629	0.531973	0.856196	0.580501	-0.52464	0.46144	0.905535	0.577289	0.82284	0.898426				COAD (n=458)	0.0533153	2.06717e-24	6.85286e-08	3.51517e-31	6.98851e-09	3.83168e-75	5.4496e-21	5.87458e-79	1.38007e-25	1.85935e-29	1.67866e-15	4.73544e-102	2.93948e-25	7.53015e-68	5.0539e-98
	DLBC (n=48)	0.271622	0.359621	0.718448	0.759068	0.702959	0.72363	0.309054	0.576091	-0.117618	-0.810508	0.40794	0.820982	-0.479152	0.731613	0.817347				DLBC (n=48)	0.0980725	0.025261	2.1871e-07	1.69205e-08	5.14518e-07	1.62809e-07	0.0578653	0.000120009	0.481594	2.73203e-10	0.0102187	1.03163e-10	0.00204989	1.00806e-07	1.44423e-10
	ESCA (n=185)	0.0126894	0.23896	0.194101	0.359848	0.246358	0.64375	0.453822	0.754706	0.433876	-0.218004	0.392358	0.780005	0.570323	0.596838	0.62905				ESCA (n=185)	0.875964	0.00166198	0.0113361	1.17921e-06	0.00116578	6.31068e-22	3.17702e-10	1.07223e-33	2.32109e-09	0.00429176	9.37897e-08	2.57096e-37	1.69793e-16	2.67768e-18	1.01025e-20
	GBM (n=153)	-0.285347	-0.262983	0.0254172	0.144701	0.676543	0.692401	0.244192	0.514131	0.721343	-0.445309	0.466182	0.794968	0.580174	0.70697	0.524286				GBM (n=153)	0.000991251	0.00253337	0.781149	0.104281	3.34804e-19	2.18207e-20	0.00524734	2.66619e-10	9.5131e-23	9.1419e-08	1.79518e-08	1.91242e-30	2.557e-13	1.55223e-21	1.02222e-10
	HNSC (n=522)	-0.115248	0.282954	0.164466	0.489849	0.29162	0.682515	0.357184	0.766556	0.52535	-0.2649	0.460871	0.760728	0.411293	0.680686	0.62822				HNSC (n=522)	0.0129572	3.30017e-10	0.000351734	2.06314e-30	8.9625e-11	1.28701e-67	7.73154e-16	8.35613e-95	1.65864e-35	4.73152e-09	1.23696e-26	1.30075e-92	5.3214e-21	3.8736e-67	1.99089e-54
	HNSC-HPV- (n=422)	-0.106169	0.281975	0.157026	0.46235	0.295777	0.691253	0.415742	0.763471	0.491962	-0.286118	0.467279	0.745041	0.467783	0.697789	0.60522				HNSC-HPV- (n=422)	0.0402886	1.81134e-08	0.0021799	4.70803e-22	3.18573e-09	3.96405e-57	1.03684e-17	2.63976e-76	3.42282e-25	1.09415e-08	1.48917e-22	8.59001e-71	1.3269e-22	1.23814e-58	1.51689e-40
	HNSC-HPV+ (n=98)	0.0233125	0.337536	0.128515	0.507457	0.271391	0.668595	0.162202	0.751765	0.662048	-0.191555	0.414979	0.785769	0.267297	0.637466	0.703312				HNSC-HPV+ (n=98)	0.840939	0.00164136	0.248725	6.62979e-07	0.0124879	1.81064e-12	0.143698	5.58213e-17	3.58061e-12	0.0827547	7.93956e-05	2.24459e-19	0.0139332	3.95555e-11	3.73678e-14
	KICH (n=66)	0.11091	0.178701	0.166983	0.470797	0.31989	0.730981	0.428472	0.841299	0.48547	-0.529561	0.47666	0.803399	0.492503	0.59618	0.588258				KICH (n=66)	0.398355	0.169635	0.200384	0.000112615	0.0117333	1.02579e-11	0.000514664	4.92376e-18	6.27147e-05	9.12857e-06	8.95529e-05	2.04303e-15	4.68082e-05	2.85101e-07	4.51059e-07
	KIRC (n=533)	-0.0675446	-0.0437709	0.0399429	0.406838	0.478418	0.61109	0.205478	0.682407	0.677337	-0.506755	0.515615	0.76086	0.407554	0.639866	0.670077				KIRC (n=533)	0.163125	0.368027	0.410686	2.45807e-19	3.96885e-27	1.18449e-47	1.36539e-05	2.05077e-63	3.84649e-62	8.76745e-31	5.45744e-32	6.76203e-87	2.11074e-19	1.62074e-53	2.24828e-60
	KIRP (n=290)	0.0844794	0.188439	-0.0122526	0.215364	0.566396	0.742778	0.426882	0.843369	0.710613	-0.560424	0.445799	0.795079	0.669653	0.715978	0.542948				KIRP (n=290)	0.192717	0.00313327	0.856137	0.000684374	9.5131e-23	1.1952e-45	1.69195e-12	7.75289e-70	3.42764e-40	3.28389e-22	1.25886e-13	1.5401e-56	3.33314e-34	4.77279e-41	1.09734e-20
	LGG (n=516)	-0.118792	-0.117377	0.0619475	0.139701	0.634953	0.81299	0.497863	0.638044	0.798235	-0.547258	0.20139	0.823625	0.33538	0.83395	0.517523				LGG (n=516)	0.0116916	0.012613	0.192717	0.00291857	2.27854e-54	4.28953e-112	1.19882e-30	4.99161e-55	3.68276e-105	6.38003e-38	1.42874e-05	1.89011e-117	1.1848e-13	6.66565e-123	2.14016e-33
	LIHC (n=371)	-0.106724	0.0502867	0.00874705	0.414676	0.324674	0.39212	0.139162	0.673823	0.529418	-0.305036	0.0772485	-0.29966	0.460624	0.391251	0.425111				LIHC (n=371)	0.0561286	0.370895	0.8802	2.28086e-15	1.30837e-09	9.57536e-14	0.0119903	3.90575e-46	9.95566e-26	1.40575e-08	0.167573	2.59083e-08	4.61196e-19	1.09272e-13	3.7484e-16
	LUAD (n=515)	-0.0269656	0.116589	-0.00622301	0.218788	0.412142	0.575	0.456505	0.760595	0.689667	-0.316976	0.587997	0.79902	0.393567	0.754984	0.564554				LUAD (n=515)	0.566338	0.011914	0.894758	1.56074e-06	3.99711e-21	6.68831e-44	3.76876e-26	9.92904e-93	1.12397e-69	1.30186e-12	2.67228e-46	8.42088e-109	3.01632e-19	1.23593e-90	4.88584e-42
	LUSC (n=501)	-0.0878898	0.20555	0.205136	0.500156	0.520847	0.771467	0.387131	0.791416	0.610263	-0.441552	0.687825	0.844061	0.292933	0.797904	0.630149				LUSC (n=501)	0.0645506	9.51967e-06	9.92213e-06	6.83567e-31	8.38273e-34	7.6194e-94	4.73123e-18	5.03509e-102	4.11391e-49	1.25367e-23	5.17356e-67	1.82404e-128	1.40551e-10	7.98547e-105	3.20626e-53
	MESO (n=87)	0.116938	0.134196	0.131559	0.288336	0.255484	0.684706	0.158774	0.634345	0.540876	-0.271066	0.501295	0.691093	0.557258	0.699792	0.85195				MESO (n=87)	0.305337	0.239979	0.248725	0.00948965	0.0222033	1.13663e-12	0.162373	1.45879e-10	1.63891e-07	0.0148441	1.70368e-06	5.74718e-13	5.62547e-08	2.18142e-13	1.75931e-24
	OV (n=303)	-0.0444221	0.0561756	0.132088	0.347763	0.439269	0.773208	0.437343	0.774007	0.424603	-0.422583	0.598685	0.832792	0.278135	0.796076	0.83419				OV (n=303)	0.502045	0.397277	0.0442632	3.24605e-08	8.29158e-13	7.2548e-50	1.07375e-12	5.02233e-50	5.64824e-12	7.28795e-12	4.88277e-25	2.58587e-64	1.32092e-05	7.76846e-55	1.02541e-64
	PAAD (n=179)	-0.118968	0.164046	0.0841544	0.380643	0.394995	0.558887	0.204835	0.825116	0.769916	-0.374727	0.641803	0.827449	0.56253	0.717572	0.8703				PAAD (n=179)	0.136166	0.0382865	0.293367	4.90266e-07	1.62672e-07	4.87569e-15	0.00919091	5.89855e-43	4.52504e-34	7.55173e-07	9.90966e-21	2.15307e-43	2.95286e-15	1.00914e-27	6.13124e-53
	PCPG (n=181)	0.111739	0.114222	0.281831	0.418558	0.143747	0.581893	0.285545	0.772602	0.373348	-0.327731	0.239119	0.694853	0.578961	0.576276	0.705346				PCPG (n=181)	0.166031	0.157059	0.000319874	3.37882e-08	0.0742302	4.26018e-16	0.0002636	1.15293e-33	1.13537e-06	2.37565e-05	0.00247627	7.70131e-25	6.48145e-16	9.47626e-16	7.54809e-26
	PRAD (n=498)	-0.0554969	0.0825616	0.0814242	0.433405	0.17638	0.541583	0.235994	0.748412	0.233862	-0.462926	0.179548	0.789317	0.31375	0.373857	0.176652				PRAD (n=498)	0.277713	0.105051	0.110058	5.33395e-20	0.000422984	2.16492e-32	1.87043e-06	1.36496e-74	2.32999e-06	6.16247e-23	0.000330303	2.36163e-88	1.2225e-10	7.45011e-15	0.000414826
	READ (n=166)	0.233161	0.683172	0.378072	0.646604	0.235495	0.798748	0.623429	0.867262	0.512364	-0.544304	0.468453	0.908515	0.465463	0.692423	0.889855				READ (n=166)	0.032392	2.78228e-13	0.0003388	1.25575e-11	0.0306096	1.25017e-20	1.10022e-10	9.10838e-28	4.30518e-07	9.46376e-12	5.19192e-06	2.24828e-34	6.09447e-06	9.71846e-14	4.55187e-31
	SARC (n=260)	-0.24041	-0.165807	0.207988	0.337029	0.576666	0.756002	0.353838	0.706881	0.672327	-0.47304	0.603835	0.651433	0.515559	0.751751	0.874927				SARC (n=260)	0.000215715	0.0118106	0.00146691	1.2411e-07	1.70983e-22	1.37963e-45	2.49502e-08	1.72554e-37	9.31291e-33	1.27858e-14	4.61616e-25	3.23171e-30	1.55295e-17	8.08018e-45	6.94709e-77
	SKCM (n=471)	-0.167936	0.131255	0.213693	0.508708	0.437064	0.598458	0.177662	0.703113	0.432075	-0.474757	0.154207	0.539043	0.224815	0.538117	0.76346				SKCM (n=471)	0.000437141	0.006412	6.47183e-06	8.71473e-31	3.26327e-22	6.66058e-45	0.000195468	2.96522e-68	1.08281e-21	1.82352e-26	0.00127853	4.63269e-35	1.98875e-06	6.32952e-35	4.6114e-87
	SKCM-Metastasis (n=368)	-0.203246	0.0741241	0.181986	0.449486	0.366159	0.562623	0.202484	0.652294	0.437327	-0.440712	0.101239	0.540428	0.143614	0.499507	0.722769				SKCM-Metastasis (n=368)	0.00017272	0.179931	0.000800243	1.49873e-18	2.52492e-12	2.66678e-30	0.000182531	1.87469e-43	1.55295e-17	8.21139e-18	0.0665906	1.29295e-27	0.00871578	3.44669e-23	1.92521e-57
	SKCM-Primary (n=103)	-0.285169	-0.0337616	0.195635	0.45414	0.471955	0.518131	0.270487	0.730975	0.204745	-0.408681	0.119122	0.379663	0.419665	0.420421	0.774663				SKCM-Primary (n=103)	0.00478792	0.751241	0.0573826	2.66952e-06	9.37186e-07	4.53271e-08	0.00768344	7.6061e-18	0.0462363	3.0762e-05	0.251059	0.000122658	1.76122e-05	1.69621e-05	4.12099e-21
	STAD (n=415)	-0.0962623	0.189662	0.183916	0.508715	0.269255	0.752131	0.416482	0.832229	0.650099	-0.506341	0.565351	0.822461	0.586208	0.745358	0.843519				STAD (n=415)	0.0712784	0.000291574	0.000447156	9.51025e-26	1.83212e-07	4.01979e-69	6.59277e-17	4.42878e-97	4.92454e-46	1.72811e-25	1.06564e-32	6.01983e-93	1.36666e-35	2.819e-67	3.54367e-102
	TGCT (n=150)	0.151253	0.394606	0.0621961	0.451575	0.507471	0.408273	-0.188998	0.19528	0.531145	-0.408187	0.292369	0.50946	0.394382	0.402881	0.628419				TGCT (n=150)	0.0779669	1.27509e-06	0.47234	1.79518e-08	1.11837e-10	4.95225e-07	0.026349	0.0216311	9.75647e-12	4.96895e-07	0.000455489	9.30369e-11	1.29168e-06	7.20248e-07	4.26192e-17
	THCA (n=509)	0.184514	0.40969	0.348497	0.527606	0.660841	0.558149	-0.0715467	0.823375	0.448575	-0.694075	0.119859	0.608327	0.0491203	0.56422	0.476159				THCA (n=509)	6.23699e-05	1.11183e-20	5.48939e-15	1.43665e-35	1.56582e-61	1.5785e-40	0.128841	1.0045e-119	5.74057e-25	3.45242e-70	0.0101507	7.93402e-50	0.298203	1.45137e-41	2.35193e-28
	THYM (n=120)	-0.0933942	-0.0726448	0.21725	0.3552	0.0808481	0.0298048	0.280283	0.393151	0.471328	-0.246064	0.111937	0.555961	0.13886	0.163562	0.511004				THYM (n=120)	0.341299	0.459535	0.0238656	0.000144591	0.409485	0.765892	0.00318327	2.14583e-05	1.89449e-07	0.0101507	0.251232	2.28227e-10	0.154584	0.0924066	1.04322e-08
	UCEC (n=545)	-0.0171001	0.182052	0.397947	0.514673	0.291553	0.483181	0.293927	0.683838	0.533422	-0.437653	0.469765	0.723694	0.657869	0.558749	0.704833				UCEC (n=545)	0.881701	0.102186	0.000180384	5.01359e-07	0.0075488	3.01856e-06	0.00703932	4.87845e-13	1.59052e-07	9.49497e-15	6.23215e-06	4.12091e-15	7.28795e-12	2.89167e-08	4.37713e-14
	UCS (n=57)	-0.357527	-0.0910616	0.318915	0.411971	0.250022	0.783326	0.455384	0.745051	0.584556	-0.399095	0.369456	0.869518	0.464699	0.724959	0.561554				UCS (n=57)	0.0107952	0.532654	0.0241184	0.00288894	0.0815903	9.05606e-12	0.000840206	3.17757e-10	6.87507e-06	0.00402695	0.00832159	8.01374e-17	0.000631529	1.66214e-09	1.88995e-05
	UVM (n=80)	-0.176264	0.0157621	0.414182	0.512774	0.419091	0.458117	-0.0520676	0.800545	0.515677	-0.546455	0.513749	0.436025	0.193207	0.707274	0.825127				UVM (n=80)	0.140374	0.894758	0.000259933	3.01856e-06	0.000214817	4.26839e-05	0.668508	6.66868e-18	2.60712e-06	4.77839e-07	2.87917e-06	0.000110096	0.104849	1.46718e-12	8.30573e-20

## Sheet: Neu
Coefficients									Adj.P
	cancer	Neutrophil_CIBERSORT	Neutrophil_CIBERSORT-ABS	Neutrophil_MCPCOUNTER	Neutrophil_QUANTISEQ	Neutrophil_TIMER	Neutrophil_XCELL			cancer	Neutrophil_CIBERSORT	Neutrophil_CIBERSORT-ABS	Neutrophil_MCPCOUNTER	Neutrophil_QUANTISEQ	Neutrophil_TIMER	Neutrophil_XCELL
	ACC (n=79)	0.127106	0.14436	0.0384653	0.149773	0.245209	0.0955432			ACC (n=79)	0.418839	0.360159	0.814808	0.34667	0.0909526	0.547303
	BLCA (n=408)	0.0567075	0.112166	-0.0258367	-0.0302538	0.500332	0.033206			BLCA (n=408)	0.41256	0.0808518	0.719094	0.682919	1.55768e-23	0.650652
	BRCA (n=1100)	0.0564583	0.0749352	0.0654024	0.106729	0.564952	0.0874913			BRCA (n=1100)	0.160493	0.0541726	0.0966972	0.00326257	8.22111e-83	0.0199314
	BRCA-Basal (n=191)	0.0860484	0.108219	0.224674	0.106766	0.546313	-0.0310289			BRCA-Basal (n=191)	0.391643	0.278899	0.0107969	0.282251	6.57236e-14	0.760814
	BRCA-Her2 (n=82)	0.104091	0.12213	0.0132916	0.0749888	0.617959	-0.168643			BRCA-Her2 (n=82)	0.50734	0.433848	0.935243	0.65452	5.65385e-08	0.279568
	BRCA-LumA (n=568)	-0.0221129	-0.00551574	0.0793292	0.148764	0.648234	0.0989248			BRCA-LumA (n=568)	0.719094	0.931619	0.153969	0.00305701	3.56417e-61	0.0665061
	BRCA-LumB (n=219)	0.147042	0.163707	-0.115347	0.0695944	0.559342	0.19819			BRCA-LumB (n=219)	0.100976	0.063936	0.217683	0.468914	4.24838e-16	0.0199314
	CESC (n=306)	-0.17615	-0.123517	-0.0747881	0.0466646	0.524935	-0.0858634			CESC (n=306)	0.0120096	0.0974194	0.351408	0.563957	6.78361e-20	0.278899
	CHOL (n=36)	-0.0418952	0.0759854	-0.165043	0.0181944	0.368899	0.280851			CHOL (n=36)	0.859733	0.745507	0.473962	0.936979	0.0766968	0.208453
	COAD (n=458)	0.311402	0.360231	0.423185	0.190152	0.72237	0.247557			COAD (n=458)	9.47758e-07	6.433e-09	2.06555e-12	0.00617755	3.24979e-44	0.000171717
	DLBC (n=48)	0.187835	0.226949	0.258344	-0.184958	0.621159	0.0879499			DLBC (n=48)	0.374241	0.278899	0.208453	0.378391	7.9678e-05	0.695022
	ESCA (n=185)	-0.104701	-0.0528649	0.11147	-0.0876515	0.390006	-0.278538			ESCA (n=185)	0.282251	0.608159	0.262035	0.374241	4.65795e-07	0.000731347
	GBM (n=153)	0.0101871	0.0948743	0.0178325	0.07171	0.597874	0.100478			GBM (n=153)	0.933285	0.403489	0.876806	0.528934	1.2178e-13	0.374241
	HNSC (n=522)	-0.155483	-0.0544687	0.0799134	0.197947	0.588618	-0.17425			HNSC (n=522)	0.00242609	0.362991	0.161968	5.66473e-05	1.00081e-45	0.000499165
	HNSC-HPV- (n=422)	-0.133533	-0.0246686	0.107973	0.227178	0.574481	-0.178229			HNSC-HPV- (n=422)	0.0241875	0.719094	0.0801397	2.7231e-05	3.34687e-35	0.00156634
	HNSC-HPV+ (n=98)	-0.20354	-0.156658	-0.0396596	0.0607578	0.534222	0.0321526			HNSC-HPV+ (n=98)	0.123537	0.266622	0.784322	0.690035	5.0528e-07	0.827147
	KICH (n=66)	0.238398	0.285635	0.248852	0.249165	0.517833	-0.0667555			KICH (n=66)	0.123537	0.0592863	0.10688	0.10688	5.6769e-05	0.706657
	KIRC (n=533)	0.221463	0.275474	0.0773314	0.0989266	0.725128	-0.0259643			KIRC (n=533)	1.0154e-05	1.47893e-08	0.202104	0.0848145	1.74518e-74	0.690916
	KIRP (n=290)	0.0928196	0.169857	-0.0814715	0.0443611	0.71226	-0.0280269			KIRP (n=290)	0.262035	0.0207089	0.328276	0.60774	6.74584e-40	0.739347
	LGG (n=516)	0.149442	0.191395	-0.145266	NA	0.780555	0.359338			LGG (n=516)	0.00447548	0.000134108	0.00597347	NA	8.24259e-97	5.58542e-15
	LIHC (n=371)	-0.00274963	0.0551915	0.024079	0.0328225	0.329044	-0.00339772			LIHC (n=371)	0.963447	0.433848	0.739347	0.666076	3.30343e-09	0.957877
	LUAD (n=515)	0.0831709	0.166354	0.0887929	0.115612	0.562689	-0.0207545			LUAD (n=515)	0.14254	0.000970628	0.113214	0.0316471	3.90935e-41	0.736812
	LUSC (n=501)	0.123259	0.219086	0.107374	0.136124	0.368553	0.100975			LUSC (n=501)	0.0230283	9.01096e-06	0.0560324	0.0107969	9.76232e-16	0.0728734
	MESO (n=87)	-0.160296	-0.1222	-0.0980952	0.0612493	0.419124	0.0873766			MESO (n=87)	0.266622	0.398668	0.493944	0.690916	0.000332649	0.551013
	OV (n=303)	0.0961262	0.127628	0.057738	-0.101523	0.498972	0.0324907			OV (n=303)	0.253284	0.105674	0.491864	0.217327	5.28187e-16	0.718031
	PAAD (n=179)	0.0529949	0.108436	0.201596	0.213608	0.708309	-0.00605058			PAAD (n=179)	0.617879	0.279761	0.0261029	0.0179349	3.75657e-26	0.949313
	PCPG (n=181)	0.0669074	0.0820725	0.186054	0.113449	0.329322	0.0192758			PCPG (n=181)	0.512515	0.423213	0.0486129	0.267433	7.71774e-05	0.859733
	PRAD (n=498)	0.110009	0.113748	-0.0945177	0.0514386	0.643162	0.190688			PRAD (n=498)	0.0667155	0.0577868	0.121905	0.423213	2.4601e-48	0.000452836
	READ (n=166)	0.205532	0.240683	0.205544	0.194208	0.504466	-0.0141502			READ (n=166)	0.11829	0.0619916	0.11829	0.144766	2.72183e-06	0.929701
	SARC (n=260)	0.0895951	0.0949045	0.0802404	-0.0155067	0.574571	0.0103991			SARC (n=260)	0.282251	0.26434	0.351321	0.859733	1.09478e-21	0.909676
	SKCM (n=471)	-0.0823662	-0.0760353	0.0569063	-0.0298464	0.610816	0.0361097			SKCM (n=471)	0.164753	0.209908	0.360397	0.650652	1.51967e-46	0.563957
	SKCM-Metastasis (n=368)	0.0166299	0.019897	0.0475889	-0.0318492	0.577478	0.0857784			SKCM-Metastasis (n=368)	0.820411	0.784322	0.493944	0.671062	1.22364e-31	0.213391
	SKCM-Primary (n=103)	0.033614	0.0458269	0.129384	-0.142497	0.550528	-0.0290025			SKCM-Primary (n=103)	0.808354	0.736812	0.33045	0.278899	1.62616e-08	0.831445
	STAD (n=415)	0.0468974	0.119608	0.164881	0.109441	0.575566	0.001174			STAD (n=415)	0.491864	0.0571562	0.00534947	0.0843523	1.4949e-33	0.981826
	TGCT (n=150)	-0.0781061	-0.0781061	-0.0558553	-0.251399	0.574889	-0.083803			TGCT (n=150)	0.473962	0.473962	0.627674	0.00820984	2.52728e-13	0.439898
	THCA (n=509)	0.115321	0.140688	0.0405667	0.0748317	0.626981	-0.118677			THCA (n=509)	0.0330541	0.00719614	0.493944	0.203367	5.44249e-53	0.0273123
	THYM (n=120)	-0.255162	-0.255358	0.27142	0.00886583	0.291872	0.11536			THYM (n=120)	0.0199314	0.0199314	0.0121116	0.940824	0.00617755	0.356982
	UCEC (n=545)	0.126266	0.126293	-0.134902	-0.140305	0.455912	0.13372			UCEC (n=545)	0.374241	0.374241	0.35124	0.328276	4.81191e-05	0.351408
	UCS (n=57)	0.0290426	0.0332837	0.139154	0.320064	0.0591095	-0.0689412			UCS (n=57)	0.876806	0.859733	0.447737	0.0567545	0.75293	0.719094
	UVM (n=80)	-0.120702	-0.120702	0.502905	0.132876	0.0564478	0.121237			UVM (n=80)	0.423213	0.423213	1.97772e-05	0.379523	0.719094	0.423213
