# Supplementary material for: Tumor Derived SIGLEC Family Genes May Play Roles in Tumor Genesis, Progression, and Immune Microenvironment Regulation
Source: Front Oncol. 2020 Nov 9;10:586820. doi: 10.3389/fonc.2020.586820 (PMC7681003; doi:10.3389/fonc.2020.586820)
Supplement: Supplementary file 11 [file Table_11.xlsx]

## Sheet: B cell
Coefficients																			Adj.P
	cancer	B cell memory_CIBERSORT	B cell memory_CIBERSORT-ABS	B cell memory_XCELL	B cell naive_CIBERSORT	B cell naive_CIBERSORT-ABS	B cell naive_XCELL	B cell plasma_CIBERSORT	B cell plasma_CIBERSORT-ABS	B cell plasma_XCELL	B cell_EPIC	B cell_MCPCOUNTER	B cell_QUANTISEQ	B cell_TIMER	B cell_XCELL	Class-switched memory B cell_XCELL				cancer	B cell memory_CIBERSORT	B cell memory_CIBERSORT-ABS	B cell memory_XCELL	B cell naive_CIBERSORT	B cell naive_CIBERSORT-ABS	B cell naive_XCELL	B cell plasma_CIBERSORT	B cell plasma_CIBERSORT-ABS	B cell plasma_XCELL	B cell_EPIC	B cell_MCPCOUNTER	B cell_QUANTISEQ	B cell_TIMER	B cell_XCELL	Class-switched memory B cell_XCELL
	ACC (n=79)	-0.21693	-0.217201	-0.0838484	0.337386	0.230531	0.0245067	0.0352514	-0.0813326	-0.193238	-0.242624	-0.0249684	0.202596	-0.186127	0.0787267	0.271584				ACC (n=79)	0.135026	0.135026	0.61752	0.0121795	0.109723	0.903179	0.847699	0.627897	0.191357	0.0875119	0.902859	0.169387	0.211436	0.637572	0.052698
	BLCA (n=408)	0.0610398	0.107848	0.209014	0.0410895	0.107989	0.173654	-0.308118	-0.027561	-0.0103259	0.16051	0.255749	0.259297	0.00801421	0.310099	0.183315				BLCA (n=408)	0.370666	0.0875119	0.000323027	0.569586	0.0875119	0.00376354	2.78551e-08	0.71926	0.906991	0.00773237	6.10581e-06	4.48949e-06	0.926073	2.4188e-08	0.00209411
	BRCA (n=1100)	0.0959284	0.108677	0.0603269	-0.16382	-0.0321949	0.11855	-0.212006	-0.0805341	0.0479027	0.0790835	0.116048	0.178229	-0.0919747	0.167561	0.0906945				BRCA (n=1100)	0.0090742	0.0028616	0.122267	2.13476e-06	0.450693	0.000997637	4.58651e-10	0.0319773	0.234356	0.0355713	0.00131708	2.14399e-07	0.0127022	1.19289e-06	0.013876
	BRCA-Basal (n=191)	0.0945932	0.132408	0.25614	-0.0838447	0.0542883	0.265182	-0.214674	0.00458002	0.117133	0.194633	0.172384	0.300354	0.103875	0.32198	0.326435				BRCA-Basal (n=191)	0.340315	0.164227	0.00300538	0.40612	0.613892	0.00209411	0.0143454	0.969485	0.222956	0.0298998	0.0585496	0.000339298	0.289464	0.000105284	8.16883e-05
	BRCA-Her2 (n=82)	0.119516	0.121083	0.0161454	-0.268228	-0.114035	0.0463366	-0.0693792	0.0318303	0.0194085	0.0602406	0.0725999	0.284437	-0.0554865	0.0985093	-0.00794077				BRCA-Her2 (n=82)	0.456125	0.450693	0.935355	0.0582613	0.475784	0.797905	0.688804	0.865706	0.922167	0.730927	0.671373	0.041583	0.755472	0.548369	0.967537
	BRCA-LumA (n=568)	0.0515818	0.0592631	-0.0583251	-0.187369	-0.0756261	0.058273	-0.192997	-0.101805	0.00833635	-0.0288283	0.0213734	0.0729674	-0.134791	0.0907024	-0.00471307				BRCA-LumA (n=568)	0.369925	0.296657	0.303869	0.000124305	0.169387	0.303869	7.5213e-05	0.0537412	0.912364	0.642699	0.74293	0.18863	0.00808962	0.088521	0.946062
	BRCA-LumB (n=219)	0.151093	0.156795	0.106478	-0.136898	-0.00472063	0.0986986	-0.21393	-0.0925304	0.175179	0.178742	0.219105	0.185979	-0.12787	0.296574	0.154042				BRCA-LumB (n=219)	0.0837763	0.071391	0.245507	0.123598	0.967537	0.289464	0.0103726	0.326323	0.0407705	0.0367282	0.00851119	0.0292588	0.156901	0.000188564	0.0771145
	CESC (n=306)	0.0476352	0.063597	0.19565	0.0373087	0.0761481	0.174928	-0.0957173	0.0144854	0.116076	0.210125	0.226238	0.206233	0.266039	0.378749	0.285524				CESC (n=306)	0.567912	0.429791	0.00458953	0.667651	0.331161	0.0121795	0.206672	0.880788	0.116201	0.00218804	0.000819014	0.00269351	5.88409e-05	1.92207e-09	1.17815e-05
	CHOL (n=36)	0.415067	0.380818	0.167356	-0.258664	-0.170173	0.157528	-0.174431	-0.146036	-0.0547002	0.0102658	0.0676271	0.136907	0.313663	0.287596	0.356516				CHOL (n=36)	0.0367282	0.060536	0.471847	0.236	0.466917	0.503836	0.456125	0.540693	0.840308	0.969485	0.797905	0.569602	0.136693	0.182891	0.0820032
	COAD (n=458)	0.0314325	0.0512439	0.04403	-0.0236071	0.189973	0.0422254	-0.150756	0.0934611	-0.0287527	0.323938	0.355121	0.333692	-0.207097	0.167106	0.0685594				COAD (n=458)	0.721683	0.535674	0.605332	0.797905	0.00616524	0.621215	0.0351902	0.221131	0.748497	4.74794e-07	2.53822e-08	2.0181e-07	0.00269351	0.0169998	0.388683
	DLBC (n=48)	-0.37951	-0.0419863	-0.151438	-0.0795774	0.00567106	-0.283396	0.0213032	0.0649994	-0.429516	-0.261483	-0.140473	-0.075129	-0.395236	-0.242973	0.141965				DLBC (n=48)	0.0396216	0.86808	0.479693	0.736248	0.981361	0.148611	0.935355	0.790471	0.0161112	0.189605	0.519582	0.75366	0.0308516	0.226058	0.513813
	ESCA (n=185)	0.222355	0.23583	0.0122776	-0.090158	0.0430963	0.106075	-0.243464	-0.045415	-0.00857138	0.232338	0.22048	0.212575	0.254599	0.212366	0.175968				ESCA (n=185)	0.0097561	0.00577253	0.922167	0.353714	0.691249	0.265861	0.00433575	0.671373	0.943682	0.00665967	0.0104935	0.013876	0.00272232	0.013876	0.0483559
	GBM (n=153)	-0.0473141	-0.0259068	0.145837	0.0114561	0.0582349	0.0362876	-0.0919938	-0.00768091	-0.0616082	0.00965411	0.35967	0.105641	0.366825	0.310355	0.226265				GBM (n=153)	0.705223	0.845527	0.174603	0.935355	0.631737	0.781936	0.421177	0.952412	0.613576	0.943887	0.000111841	0.343089	7.79143e-05	0.0012189	0.024015
	HNSC (n=522)	0.0309202	0.0671363	0.187561	0.0800492	0.126127	0.186428	-0.071918	0.162553	0.0831769	0.267824	0.366909	0.376014	-0.329663	0.369507	0.246713				HNSC (n=522)	0.627897	0.240356	0.000182418	0.155262	0.0161112	0.000199953	0.205759	0.00154732	0.135026	2.78551e-08	2.99938e-15	5.71007e-16	2.73239e-12	1.97935e-15	3.76629e-07
	HNSC-HPV- (n=422)	0.0136475	0.0437959	0.16099	0.0740127	0.115325	0.170452	-0.0832365	0.136864	0.0134429	0.246781	0.373116	0.363256	-0.347469	0.354286	0.208294				HNSC-HPV- (n=422)	0.863229	0.52016	0.00518896	0.244027	0.0546888	0.00292101	0.187246	0.0189081	0.865094	5.5263e-06	7.00689e-13	2.73239e-12	3.02571e-11	1.06547e-11	0.000174854
	HNSC-HPV+ (n=98)	-0.00361439	0.0463549	0.175731	0.0388391	0.111806	0.216937	-0.0446331	0.176036	0.23261	0.263954	0.258084	0.299517	-0.239494	0.334526	0.272568				HNSC-HPV+ (n=98)	0.981361	0.777672	0.19014	0.814171	0.435527	0.0924685	0.785219	0.189605	0.0681059	0.0352053	0.0399144	0.0141138	0.0602364	0.00552921	0.0292588
	KICH (n=66)	0.179314	0.179314	0.0946922	-0.303186	-0.13556	-0.137679	-0.427636	-0.320552	-0.20658	-0.0980497	0.0460692	-0.109969	0.149252	0.0742982	0.0171681				KICH (n=66)	0.261738	0.261738	0.58883	0.0389517	0.418075	0.409093	0.00198627	0.0278372	0.189605	0.57392	0.813129	0.52016	0.363029	0.684094	0.935355
	KIRC (n=533)	0.00804231	0.0157212	0.00814116	-0.103964	-0.0318111	0.226835	-0.103611	0.152579	0.0622345	0.0874488	0.29595	0.236017	-0.0060517	0.274833	0.262736				KIRC (n=533)	0.920006	0.827003	0.919867	0.0640055	0.628747	7.69353e-06	0.0644694	0.00441253	0.299569	0.128115	2.25028e-09	2.95444e-06	0.935891	3.18322e-08	1.49795e-07
	KIRP (n=290)	0.132555	0.199922	0.254562	-0.0130189	0.0767069	0.254367	-0.393984	-0.174329	-0.094	-0.0241974	0.351533	0.229611	0.44679	0.424346	-0.00641986				KIRP (n=290)	0.0771887	0.00518896	0.000219564	0.902859	0.343089	0.000220423	1.48619e-09	0.0159909	0.235194	0.797905	9.63294e-08	0.00109661	2.39385e-12	3.53708e-11	0.946666
	LGG (n=516)	0.0806238	0.0866809	0.0255551	-0.111124	-0.0314739	-0.0193047	-0.467921	-0.391336	-0.202727	-0.384443	0.0467564	-0.195311	0.290194	0.280254	0.244711				LGG (n=516)	0.15861	0.123598	0.699748	0.0407705	0.627897	0.781936	1.33436e-24	9.12641e-17	6.42819e-05	3.32291e-16	0.448061	0.000118934	2.389e-09	9.58078e-09	7.06024e-07
	LIHC (n=371)	0.0067937	0.0170257	0.0924387	-0.172472	-0.0526024	-0.0186809	0.00155658	0.0651227	-0.0525021	0.0412448	0.209327	0.224939	0.0553353	0.236703	0.0833638				LIHC (n=371)	0.936446	0.840308	0.170071	0.00534134	0.468042	0.82588	0.981928	0.352912	0.468247	0.580547	0.000531605	0.00016501	0.44588	7.03656e-05	0.221131
	LUAD (n=515)	0.0573223	0.128366	0.0177204	-0.13597	-0.0453975	0.0999659	-0.44375	-0.222404	-0.229104	0.0486883	0.103524	0.137174	0.00441036	0.189678	0.149231				LUAD (n=515)	0.327956	0.0140441	0.797905	0.00908338	0.454613	0.0648607	1.00391e-22	5.7121e-06	2.75587e-06	0.41778	0.0553835	0.00851119	0.947454	0.000151098	0.00394838
	LUSC (n=501)	0.0305678	0.0687584	0.134828	0.0643411	0.151266	0.146994	-0.175678	0.0504562	-0.0045429	0.236748	0.270704	0.254402	0.0896219	0.240594	0.224446				LUSC (n=501)	0.637061	0.236	0.0112302	0.271466	0.00405575	0.0053139	0.0006691	0.40612	0.947454	1.76841e-06	3.1051e-08	2.33942e-07	0.110868	1.19201e-06	6.66271e-06
	MESO (n=87)	-0.028494	-0.0170482	0.0557656	-0.241628	-0.21178	0.148025	-0.0570854	0.0621712	0.123095	0.108556	0.0824046	0.15191	0.135511	0.315344	0.232469				MESO (n=87)	0.86808	0.926073	0.72996	0.0642675	0.112771	0.293971	0.721683	0.696029	0.394544	0.462089	0.58883	0.278388	0.342349	0.0115283	0.0759495
	OV (n=303)	-0.0490154	-0.0262604	0.0808958	0.028716	0.00670958	-0.0128315	-0.00300815	0.0261855	-0.0362459	0.0908042	0.32919	-0.00109731	0.0400242	0.137011	0.0421601				OV (n=303)	0.577944	0.78569	0.327919	0.764097	0.946062	0.905207	0.975335	0.78569	0.694122	0.261738	1.19201e-06	0.989553	0.6606	0.0727367	0.637572
	PAAD (n=179)	-0.0891766	-0.0518018	0.0966772	0.0719358	0.126081	0.0873706	-0.229349	-0.0758283	-0.212889	0.128598	0.140705	0.0744048	-0.261745	0.132667	0.0957169				PAAD (n=179)	0.374759	0.632872	0.332627	0.484642	0.191128	0.387614	0.00926945	0.462136	0.0162739	0.182891	0.136693	0.469116	0.00269351	0.167343	0.339002
	PCPG (n=181)	0.193108	0.19704	0.110711	-0.152825	-0.0267636	0.244981	-0.184335	0.0978365	0.0752398	0.155941	0.44745	0.297686	0.247797	0.134834	0.0836986				PCPG (n=181)	0.0352053	0.0311482	0.263096	0.107699	0.826067	0.00575121	0.045784	0.332627	0.469116	0.0989079	2.53822e-08	0.000549669	0.00518896	0.165223	0.418075
	PRAD (n=498)	0.0943263	0.102356	0.0722763	-0.00898359	0.186217	0.0646288	-0.171706	0.0857857	-0.17064	0.254379	0.210725	0.263863	-0.105714	0.0805175	-0.0559706				PRAD (n=498)	0.11775	0.084507	0.245422	0.916122	0.00076218	0.307034	0.00219432	0.162676	0.00236519	1.57592e-06	0.000105284	5.62767e-07	0.0734791	0.191357	0.386866
	READ (n=166)	-0.233825	-0.211954	-0.172622	0.138358	0.242444	-0.106499	-0.247114	-0.0358316	-0.131288	0.00514519	0.0694101	0.202754	-0.0540066	-0.0650194	-0.0622898				READ (n=166)	0.0648607	0.100167	0.194515	0.313673	0.0551285	0.456125	0.0498747	0.827003	0.343089	0.975335	0.644565	0.118486	0.72996	0.671287	0.686788
	SARC (n=260)	-0.0980073	-0.078875	0.0108389	-0.0511284	0.0335576	0.173115	-0.255866	-0.164255	-0.149913	0.0859837	0.232344	0.141825	-0.0676808	0.199969	0.102874				SARC (n=260)	0.227151	0.343089	0.921525	0.564997	0.721683	0.0206554	0.000322069	0.0300544	0.0503478	0.29781	0.00133442	0.06497	0.429922	0.00665967	0.20238
	SKCM (n=471)	0.0481333	0.123176	0.217207	-0.119224	-0.0416675	0.29199	0.0638775	0.23233	0.205846	0.259779	0.342793	0.268757	-0.0937266	0.410368	0.303518				SKCM (n=471)	0.445666	0.0254188	2.34617e-05	0.0311482	0.512557	4.53184e-09	0.289464	4.95067e-06	7.14009e-05	2.33942e-07	2.39385e-12	8.37295e-08	0.100497	1.08713e-17	1.02292e-09
	SKCM-Metastasis (n=368)	-0.0374389	0.0286585	0.0796441	-0.2498	-0.177033	0.156357	-0.0326511	0.153316	0.0515851	0.115336	0.1806	0.135965	-0.16429	0.253504	0.1517				SKCM-Metastasis (n=368)	0.618688	0.71203	0.237124	1.66774e-05	0.00376354	0.0112302	0.669828	0.0129221	0.469116	0.0715175	0.00299998	0.0306963	0.00745942	1.17815e-05	0.013876
	SKCM-Primary (n=103)	0.093297	0.155458	0.221365	-0.0769387	-0.0216979	0.274245	0.153956	0.218831	0.224555	0.11839	0.316837	0.19054	-0.147149	0.404217	0.324426				SKCM-Primary (n=103)	0.484642	0.216495	0.0636543	0.577944	0.899053	0.0165071	0.221131	0.0656279	0.0591556	0.363029	0.00504295	0.118448	0.244151	0.000165903	0.00393606
	STAD (n=415)	0.0417484	0.0803507	0.217751	-0.0670438	0.175459	0.156011	-0.165281	0.00227234	-0.0442629	0.278294	0.315396	0.293291	0.114415	0.302459	0.225959				STAD (n=415)	0.556929	0.216495	0.0001294	0.313486	0.0028616	0.00862302	0.00518896	0.976221	0.528468	4.50808e-07	7.48336e-09	9.08713e-08	0.0642675	3.1051e-08	7.03656e-05
	TGCT (n=150)	-0.0103957	-0.00261306	-0.20101	-0.135265	-0.111402	-0.237298	-0.129653	-0.0711924	-0.0774108	-0.249283	-0.0776811	-0.271637	-0.153667	-0.308202	-0.194321				TGCT (n=150)	0.936446	0.981485	0.0399144	0.192525	0.296956	0.0128945	0.215682	0.529068	0.484642	0.00862302	0.484642	0.00393606	0.132443	0.000819014	0.0487234
	THCA (n=509)	0.13147	0.172926	0.234242	-0.0155148	0.0681352	0.165852	0.0123744	0.249317	0.204936	0.328384	0.28856	0.355938	-0.195087	0.275685	0.19865				THCA (n=509)	0.0124846	0.00071209	1.76841e-06	0.826067	0.235789	0.00126117	0.863229	3.104e-07	4.18039e-05	3.93566e-12	2.1396e-09	3.37853e-14	0.000104103	1.20666e-08	7.5213e-05
	THYM (n=120)	-0.111095	0.0292558	-0.0239109	0.0529781	0.0513303	0.0577898	-0.113625	-0.0927412	9.7103e-05	0.0755947	-0.203831	0.161556	-0.306879	-0.180448	0.0775105				THYM (n=120)	0.363995	0.840308	0.870888	0.697045	0.707312	0.669828	0.352346	0.462136	0.999178	0.56141	0.0693398	0.167963	0.00386566	0.116201	0.548369
	UCEC (n=545)	0.0159925	0.045514	0.174204	-0.236399	-0.12053	0.048285	0.0513801	0.156135	0.144274	0.261568	0.279984	0.266865	0.302073	0.305945	0.296047				UCEC (n=545)	0.928876	0.781936	0.195395	0.0648607	0.395965	0.766157	0.748497	0.252998	0.297342	0.0384152	0.0251027	0.0343289	0.013876	0.0127689	0.0161112
	UCS (n=57)	0.0411706	0.0452336	0.255614	-0.0123273	0.0437988	-0.0430792	0.100124	0.227593	-0.0475807	0.293167	0.223423	0.000788175	0.112405	0.0231142	-0.132732				UCS (n=57)	0.848987	0.837025	0.135026	0.952412	0.840308	0.842204	0.613731	0.191357	0.827003	0.0771887	0.200869	0.997193	0.56141	0.922167	0.479169
	UVM (n=80)	-0.0435616	-0.0209147	0.0966976	-0.346439	-0.222719	0.104026	-0.356868	0.1618	0.139381	0.350786	0.197969	0.141862	-0.165504	0.24288	0.2141				UVM (n=80)	0.804688	0.916284	0.540693	0.00774115	0.112771	0.50518	0.00577253	0.270795	0.352346	0.00686127	0.167963	0.343089	0.259134	0.0771887	0.129518

## Sheet: CD4 T
Coefficients																			Adj.P
	cancer	T cell CD4+ (non-regulatory)_QUANTISEQ	T cell CD4+ (non-regulatory)_XCELL	T cell CD4+ central memory_XCELL	T cell CD4+ effector memory_XCELL	T cell CD4+ memory activated_CIBERSORT	T cell CD4+ memory activated_CIBERSORT-ABS	T cell CD4+ memory resting_CIBERSORT	T cell CD4+ memory resting_CIBERSORT-ABS	T cell CD4+ memory_XCELL	T cell CD4+ naive_CIBERSORT	T cell CD4+ naive_CIBERSORT-ABS	T cell CD4+ naive_XCELL	T cell CD4+ Th1_XCELL	T cell CD4+ Th2_XCELL	T cell CD4+_EPIC	T cell CD4+_TIMER			cancer	T cell CD4+ (non-regulatory)_QUANTISEQ	T cell CD4+ (non-regulatory)_XCELL	T cell CD4+ central memory_XCELL	T cell CD4+ effector memory_XCELL	T cell CD4+ memory activated_CIBERSORT	T cell CD4+ memory activated_CIBERSORT-ABS	T cell CD4+ memory resting_CIBERSORT	T cell CD4+ memory resting_CIBERSORT-ABS	T cell CD4+ memory_XCELL	T cell CD4+ naive_CIBERSORT	T cell CD4+ naive_CIBERSORT-ABS	T cell CD4+ naive_XCELL	T cell CD4+ Th1_XCELL	T cell CD4+ Th2_XCELL	T cell CD4+_EPIC	T cell CD4+_TIMER
	ACC (n=79)	-0.191815	0.053805	0.0871053	-0.331107	-0.19819	-0.19819	-0.0485358	-0.166651	-0.328931	-0.149141	-0.155778	-0.219404	0.364751	0.222019	-0.0615342	-0.021186			ACC (n=79)	0.21842	0.789165	0.630945	0.0162054	0.198175	0.198175	0.809667	0.298478	0.0170461	0.362838	0.335179	0.148949	0.00679582	0.143081	0.759314	0.915466
	BLCA (n=408)	-0.0612035	0.04117	-0.203043	0.11535	0.241946	0.266703	0.0608833	0.221999	0.170936	-0.218684	-0.211849	0.0677954	0.0318733	0.192578	-0.177984	0.172165			BLCA (n=408)	0.400418	0.599835	0.000656621	0.0753798	2.9397e-05	3.02832e-06	0.402987	0.000155161	0.00481703	0.000194432	0.000338452	0.343097	0.70753	0.0012851	0.00311518	0.00445543
	BRCA (n=1100)	-0.0280722	0.0626435	0.0834663	0.203548	0.141549	0.144593	-0.00427615	0.161147	0.120856	-0.0570823	-0.0574229	0.138358	-0.0851834	-0.0121216	0.093817	0.126303			BRCA (n=1100)	0.549436	0.120823	0.0286841	2.18252e-09	7.24551e-05	4.87104e-05	0.927149	4.56686e-06	0.000886695	0.161508	0.159434	0.000112781	0.0252228	0.827421	0.0126251	0.000513688
	BRCA-Basal (n=191)	-0.105929	0.101574	-0.0117802	0.210447	0.242721	0.263876	-0.0531681	0.178493	0.244258	-0.0167567	-0.0189852	0.180006	0.104747	0.107069	0.0357711	0.129392			BRCA-Basal (n=191)	0.305116	0.330062	0.921261	0.0194701	0.0057519	0.00244355	0.652761	0.0564235	0.00543615	0.89598	0.884559	0.0536714	0.312163	0.298478	0.783643	0.19229
	BRCA-Her2 (n=82)	-0.260886	0.105989	0.121227	0.156818	0.0410334	0.0304184	-0.087273	0.108186	-0.039825	NA	NA	0.0989156	-0.101109	-0.153561	0.0108948	-0.0363374			BRCA-Her2 (n=82)	0.0753798	0.549436	0.485233	0.335179	0.84518	0.882404	0.632744	0.542078	0.849879	NA	NA	0.57822	0.566092	0.346141	0.950252	0.864816
	BRCA-LumA (n=568)	0.0493452	0.0603219	0.0956145	0.189423	0.0696801	0.070162	-0.0068979	0.102538	0.0347022	-0.0811239	-0.0815784	0.0892619	-0.10736	-0.06949	0.0963759	0.0681222			BRCA-LumA (n=568)	0.4266	0.313791	0.0807123	0.00013448	0.233012	0.230309	0.920986	0.0596722	0.599835	0.152387	0.151187	0.107967	0.0459765	0.234281	0.0779019	0.244509
	BRCA-LumB (n=219)	-0.0542829	-0.0511044	0.150777	0.298112	0.191098	0.194177	0.0854927	0.20582	0.221496	-0.0570022	-0.0570022	0.220909	-0.160009	-0.0975095	0.148383	0.164508			BRCA-LumB (n=219)	0.622573	0.650898	0.0963349	0.000221577	0.02729	0.0244952	0.400418	0.0161671	0.00879704	0.599835	0.599835	0.00895799	0.0752183	0.324939	0.103089	0.0662179
	CESC (n=306)	-0.383599	0.0614969	-0.024088	0.198608	0.154121	0.174903	-0.187698	-0.0684411	0.0926648	-0.0158688	-0.0158688	0.324599	0.116296	-0.0289936	-0.0464589	0.228921			CESC (n=306)	1.15236e-09	0.482885	0.815316	0.00440628	0.034054	0.0141206	0.00755401	0.41977	0.247026	0.882226	0.882226	5.81747e-07	0.129383	0.782995	0.606906	0.000829092
	CHOL (n=36)	0.128664	-0.0228706	-0.156439	0.0569123	0.107792	0.107792	0.171879	0.274055	0.190973	-0.244058	-0.244058	0.0449255	0.0803858	0.0378329	-0.20334	-0.298379			CHOL (n=36)	0.629124	0.927149	0.543868	0.852253	0.705686	0.705686	0.500746	0.230309	0.440187	0.298322	0.298322	0.882235	0.787444	0.896012	0.400418	0.177438
	COAD (n=458)	-0.163557	-0.0560953	-0.0227798	0.122868	-0.0294076	0.0188007	-0.0366952	0.482382	0.0755985	-0.0103112	-0.0100648	0.265167	-0.203675	-0.079241	0.177944	0.292456			COAD (n=458)	0.0233588	0.533211	0.829266	0.106927	0.782995	0.860019	0.70753	2.06309e-15	0.366885	0.916488	0.916488	7.92194e-05	0.0034505	0.337448	0.0126251	1.00432e-05
	DLBC (n=48)	-0.0911278	-0.0674553	-0.406375	0.152158	0.523885	0.603561	-0.053959	-0.0576488	0.239114	-0.283928	-0.281058	0.0215018	0.0724441	0.358464	0.0902677	-0.179862			DLBC (n=48)	0.729624	0.806872	0.0285297	0.521705	0.00244888	0.000241244	0.849493	0.840388	0.258559	0.161508	0.165932	0.927149	0.789165	0.0638018	0.732808	0.42403
	ESCA (n=185)	-0.149035	0.178261	-0.108442	0.0683462	0.116143	0.15572	-0.0191878	0.285698	0.267071	-0.0477736	-0.0477736	0.256039	-0.0696305	-0.0965152	0.0794973	0.166327			ESCA (n=185)	0.115548	0.0516979	0.284709	0.540785	0.244125	0.0963349	0.882235	0.000724546	0.00170643	0.69237	0.69237	0.00278704	0.533211	0.346141	0.459411	0.0727794
	GBM (n=153)	-0.25155	-0.113404	0.111291	0.0780483	-0.0760115	-0.0742223	0.0197786	0.180551	-0.0321774	0.0414386	0.0423558	0.195167	0.0514173	-0.192713	0.214214	0.412047			GBM (n=153)	0.0126216	0.334713	0.343894	0.542078	0.549436	0.556546	0.890656	0.0931475	0.830178	0.782995	0.780442	0.0659148	0.71241	0.069605	0.038333	7.41698e-06
	HNSC (n=522)	-0.203777	0.110482	-0.277668	-0.0298738	0.2429	0.283865	0.00599594	0.220716	0.286589	-0.173598	-0.174097	0.240719	0.00652918	0.228502	0.149251	0.4462			HNSC (n=522)	5.20394e-05	0.0449882	7.99768e-09	0.675518	8.29155e-07	3.21468e-09	0.927149	9.82162e-06	2.18252e-09	0.000761136	0.000734827	1.07136e-06	0.926309	4.29498e-06	0.00441875	4.01055e-23
	HNSC-HPV- (n=422)	-0.167922	0.0895086	-0.234041	-0.00408577	0.194381	0.235922	0.033709	0.237967	0.270812	-0.177281	-0.17772	0.230137	0.00658911	0.186303	0.120958	0.476265			HNSC-HPV- (n=422)	0.00373257	0.1636	2.54594e-05	0.956328	0.000668206	2.17704e-05	0.669265	1.82951e-05	6.55486e-07	0.00210164	0.00204951	3.52868e-05	0.927149	0.00114932	0.048341	6.1312e-22
	HNSC-HPV+ (n=98)	-0.212981	0.159184	-0.334142	-0.0806456	0.403105	0.432609	-0.0991059	0.117481	0.302218	-0.165914	-0.166274	0.210155	-0.0623437	0.402427	0.246446	0.266322			HNSC-HPV+ (n=98)	0.114056	0.264049	0.00626877	0.621058	0.00066543	0.000194432	0.533211	0.440809	0.0155413	0.244125	0.243428	0.120666	0.722115	0.000669846	0.0600018	0.0378267
	KICH (n=66)	0.101711	-0.0608674	-0.135016	0.0332597	NA	NA	0.0569668	0.28126	0.0541262	0.0657077	0.0657077	-0.150032	-0.109024	0.017274	-0.0088216	0.126392			KICH (n=66)	0.590803	0.782995	0.454582	0.882226	NA	NA	0.789165	0.067756	0.803714	0.758312	0.758312	0.395509	0.556546	0.927149	0.96343	0.491139
	KIRC (n=533)	-0.143402	-0.0568354	-0.0861396	0.130606	0.00629915	0.00816802	-0.295988	-0.0222094	-0.00113547	-0.0162012	-0.0162012	0.162502	0.0088334	0.26478	0.025699	0.107087			KIRC (n=533)	0.00879704	0.383091	0.151894	0.0185452	0.927149	0.915935	2.18252e-09	0.782995	0.991	0.843831	0.843831	0.00249941	0.912239	1.53332e-07	0.737826	0.0638018
	KIRP (n=290)	0.103738	0.15684	-0.0629855	0.263473	0.137297	0.137297	-0.309368	0.22431	0.109081	NA	NA	0.0810656	-0.148735	0.0828038	0.176561	0.307383			KIRP (n=290)	0.204412	0.0378267	0.488964	0.000160371	0.0758467	0.0758467	5.44908e-06	0.00167247	0.175706	NA	NA	0.343097	0.0519263	0.332803	0.0169784	6.37959e-06
	LGG (n=516)	-0.0707596	-0.0498748	-0.0993054	0.0834078	-0.000384638	0.000118445	0.290766	0.352502	0.00282521	-0.166479	-0.158351	-0.0533501	0.124804	0.148516	-0.308977	0.618675			LGG (n=516)	0.244732	0.445489	0.0809668	0.156837	0.994887	0.997939	2.18252e-09	1.12993e-13	0.967774	0.0015532	0.00275128	0.402987	0.0225219	0.00538553	1.72916e-10	4.98542e-49
	LIHC (n=371)	-0.0243522	0.0103725	-0.184128	-0.00808289	0.148671	0.150532	-0.19518	0.0100677	0.152233	0.01779	0.0171978	0.203938	0.083452	0.229284	0.0634689	-0.0731787			LIHC (n=371)	0.789165	0.911424	0.00308744	0.923603	0.0206147	0.01883	0.00159019	0.913061	0.0173489	0.849879	0.854724	0.000895859	0.244509	0.000155161	0.400418	0.319676
	LUAD (n=515)	-0.204126	0.0468273	-0.039821	0.136666	0.00432585	0.0173544	0.0435419	0.32292	0.0722296	-0.0816211	-0.0816211	0.212189	-0.0826334	-0.137839	0.248838	0.0941197			LUAD (n=515)	4.9793e-05	0.471597	0.549436	0.00990131	0.949849	0.826663	0.516573	7.99089e-12	0.22781	0.159434	0.159434	2.33093e-05	0.154186	0.00925394	4.10649e-07	0.0963349
	LUSC (n=501)	-0.158147	-0.00437342	-0.111083	0.203777	0.0479299	0.0764293	0.167325	0.36413	0.0962303	-0.0106503	-0.0107383	0.145964	-0.0896326	-0.0103072	0.0363915	0.159931			LUSC (n=501)	0.00278882	0.949849	0.0476852	7.14302e-05	0.468829	0.203164	0.00149368	1.90024e-14	0.0947265	0.889997	0.889941	0.00630086	0.12456	0.893239	0.599835	0.00248859
	MESO (n=87)	-0.327567	-0.167357	-0.0813399	0.309991	0.211361	0.210574	-0.229794	-0.0511576	0.181361	NA	NA	0.105127	0.0686477	0.156487	0.076661	0.155617			MESO (n=87)	0.00940715	0.249985	0.627643	0.0152682	0.128366	0.129383	0.0925532	0.783779	0.204412	NA	NA	0.518561	0.701768	0.292327	0.652761	0.295873
	OV (n=303)	-0.117161	0.0221346	0.0492157	-0.0217687	-0.0351268	-0.0336651	-0.0684647	0.0181099	-0.0148961	0.075185	0.075185	0.0150187	0.00438761	-0.100904	0.165852	0.0773697			OV (n=303)	0.152038	0.843831	0.605766	0.84518	0.737826	0.753741	0.452966	0.8716	0.889941	0.399502	0.399502	0.889941	0.96343	0.231804	0.0294396	0.383091
	PAAD (n=179)	-0.0425752	0.0872049	-0.224718	0.0543637	0.140598	0.139791	-0.215041	0.213033	0.0909067	0.0658744	0.0658744	0.246965	-0.286822	-0.140502	0.0623818	0.0871208			PAAD (n=179)	0.737826	0.41977	0.0127123	0.650404	0.154186	0.156837	0.0177565	0.0189726	0.399502	0.558705	0.558705	0.00538553	0.000926965	0.154186	0.588594	0.41977
	PCPG (n=181)	0.00251481	-0.00151609	-0.322235	0.261408	0.117459	0.1181	0.0793366	0.359524	-0.127965	0.0368123	0.0368123	0.0183714	-0.181315	0.107615	0.168962	0.10436			PCPG (n=181)	0.988389	0.991	0.000187176	0.00329955	0.25632	0.253776	0.482885	2.17704e-05	0.209321	0.782995	0.782995	0.889941	0.0579125	0.308099	0.079232	0.325967
	PRAD (n=498)	0.0524977	0.0388111	-0.122831	0.124207	-0.0208699	-0.020153	0.130055	0.383682	0.175914	NA	NA	0.0265647	-0.287489	0.0760362	0.197186	0.386942			PRAD (n=498)	0.455198	0.599835	0.0387168	0.0368393	0.805503	0.809667	0.02729	3.40843e-14	0.0018187	NA	NA	0.745125	4.74679e-08	0.244509	0.00040923	2.06517e-14
	READ (n=166)	-0.269261	-0.0985835	-0.196024	0.00222444	0.0933781	0.111099	-0.325696	0.149938	0.0828294	-0.0920728	-0.0920728	0.237401	-0.21729	-0.0177005	0.218612	0.23634			READ (n=166)	0.034054	0.533211	0.151187	0.991	0.552314	0.469248	0.0076355	0.298478	0.604674	0.556546	0.556546	0.0697839	0.102833	0.916488	0.100091	0.07136
	SARC (n=260)	-0.101614	-0.0390105	-0.249998	0.218251	0.0165979	0.0232456	0.0299252	0.294293	0.206744	-0.0853294	-0.0847634	0.194917	-0.185784	0.206135	-0.061106	0.402663			SARC (n=260)	0.233012	0.70753	0.000605708	0.00310614	0.882235	0.839082	0.783779	3.15584e-05	0.00543615	0.332192	0.334713	0.00940715	0.014295	0.00557129	0.521705	1.72736e-09
	SKCM (n=471)	-0.337593	0.0444725	-0.126767	0.0921489	0.302871	0.33463	-0.0127425	0.0664888	0.501921	-0.123271	-0.119899	0.247389	-0.0424182	0.331545	0.0550112	0.240097			SKCM (n=471)	5.43267e-12	0.521705	0.023563	0.121981	1.15236e-09	7.99089e-12	0.879401	0.2967	4.89952e-28	0.0285297	0.034054	1.36237e-06	0.542078	1.28396e-11	0.400418	3.02832e-06
	SKCM-Metastasis (n=368)	-0.28863	0.0372873	-0.0607531	0.133414	0.31743	0.341079	-0.0645917	0.00674864	0.398869	-0.136162	-0.133679	0.203704	-0.00507357	0.277614	0.0152291	0.153025			SKCM-Metastasis (n=368)	5.81747e-07	0.652761	0.418227	0.038333	2.09201e-08	1.23086e-09	0.384856	0.9288	2.89719e-13	0.034054	0.038177	0.000786079	0.949849	1.68892e-06	0.8716	0.0152682
	SKCM-Primary (n=103)	-0.32957	-0.0217353	-0.187097	0.125274	0.151898	0.173796	0.00172388	0.0471998	0.356136	-0.140361	-0.136441	0.223278	-0.0297978	0.209097	0.0662762	0.225842			SKCM-Primary (n=103)	0.00362031	0.896012	0.144117	0.364838	0.252587	0.175805	0.991	0.782995	0.00149129	0.298478	0.314078	0.069605	0.866827	0.0932561	0.675518	0.0661449
	STAD (n=415)	-0.0616898	0.151616	-0.095895	0.0214294	0.140147	0.18086	-0.148255	0.33285	0.195921	0.0495343	0.0495343	0.395759	-0.0958065	-0.0144279	0.166192	0.23519			STAD (n=415)	0.393086	0.0126251	0.148949	0.806872	0.0225219	0.00228347	0.0151349	9.78293e-10	0.000837379	0.516573	0.516573	7.31698e-14	0.148964	0.873818	0.00543615	3.86526e-05
	TGCT (n=150)	0.149095	0.0288789	-0.0132157	-0.0756849	-0.0170284	-0.0140451	-0.0247122	0.0267081	-0.258445	-0.123847	-0.124539	-0.189604	0.0548548	-0.115505	-0.0510314	0.0735769			TGCT (n=150)	0.161437	0.843831	0.920527	0.540785	0.903789	0.916488	0.866827	0.85384	0.00703472	0.262587	0.259139	0.0638018	0.675518	0.304892	0.706386	0.549436
	THCA (n=509)	0.00124578	0.0621779	-0.0839598	0.176807	0.00818603	0.00825287	0.0813042	0.343957	0.192481	-0.0118096	-0.0112319	0.238542	-0.101238	0.211597	-0.0259616	0.444592			THCA (n=509)	0.990681	0.313643	0.151187	0.00065355	0.914951	0.914951	0.162513	2.80456e-13	0.000162618	0.882235	0.884559	1.51961e-06	0.072189	2.708e-05	0.727481	7.29479e-23
	THYM (n=120)	0.191741	-0.141954	0.0163706	-0.167816	-0.0451093	-0.0358126	0.0811949	0.134789	-0.057063	-0.157687	-0.0564693	-0.135685	-0.349238	-0.247379	0.336929	-0.164531			THYM (n=120)	0.103089	0.25632	0.915935	0.162554	0.782995	0.827421	0.556546	0.289916	0.70753	0.198175	0.71152	0.285552	0.000874925	0.0267631	0.00145816	0.173188
	UCEC (n=545)	-0.290059	0.126667	-0.113025	0.0969307	0.23479	0.235246	-0.0733399	0.0896784	0.0946524	-0.0453405	-0.044967	-0.00982396	0.0479929	-0.00204166	-0.00480337	0.380639			UCEC (n=545)	0.0221583	0.400418	0.467217	0.543868	0.0761279	0.0758467	0.664904	0.57612	0.552166	0.806872	0.806872	0.950252	0.792954	0.991	0.980131	0.00155246
	UCS (n=57)	0.132329	0.126549	0.0823233	0.0664296	0.172104	0.172104	0.00173591	0.149658	-0.0801926	-0.0402351	-0.0402351	-0.0463741	-0.222661	0.173695	-0.138664	-0.0817941			UCS (n=57)	0.523556	0.542078	0.720184	0.782995	0.37498	0.37498	0.993311	0.455198	0.727481	0.8716	0.8716	0.849879	0.22781	0.369615	0.499766	0.721987
	UVM (n=80)	-0.201858	-0.0231943	-0.0948282	0.221502	0.0471726	0.0506398	-0.23181	-0.089738	0.438609	-0.107993	-0.079258	0.2385	-0.328381	0.390561	0.194283	0.223802			UVM (n=80)	0.172531	0.906019	0.581993	0.129383	0.809667	0.797244	0.107967	0.604674	0.000513937	0.529824	0.66113	0.0963349	0.0142402	0.0024608	0.195115	0.12456

## Sheet: CD8 T
Coefficients													Adj.P
	cancer	T cell CD8+ central memory_XCELL	T cell CD8+ effector memory_XCELL	T cell CD8+ naive_XCELL	T cell CD8+_CIBERSORT	T cell CD8+_CIBERSORT-ABS	T cell CD8+_EPIC	T cell CD8+_MCPCOUNTER	T cell CD8+_QUANTISEQ	T cell CD8+_TIMER	T cell CD8+_XCELL			cancer	T cell CD8+ central memory_XCELL	T cell CD8+ effector memory_XCELL	T cell CD8+ naive_XCELL	T cell CD8+_CIBERSORT	T cell CD8+_CIBERSORT-ABS	T cell CD8+_EPIC	T cell CD8+_MCPCOUNTER	T cell CD8+_QUANTISEQ	T cell CD8+_TIMER	T cell CD8+_XCELL
	ACC (n=79)	-0.21526	-0.116896	0.0337576	-0.420858	-0.41465	-0.158443	-0.426934	-0.180425	-0.236852	-0.463102			ACC (n=79)	0.112347	0.425801	0.851257	0.000569542	0.000701152	0.262723	0.000459389	0.196332	0.0755657	0.000122226
	BLCA (n=408)	0.320402	0.201979	0.0133403	0.130066	0.405601	0.0359978	0.36168	0.328109	0.130796	0.226967			BLCA (n=408)	2.19778e-09	0.000289409	0.863442	0.0237286	7.01461e-15	0.589866	8.16314e-12	8.47466e-10	0.022908	4.10895e-05
	BRCA (n=1100)	0.188412	0.1154	-0.00815247	-0.0369176	0.144769	0.0596804	0.167969	0.165462	-0.0353251	0.132139			BRCA (n=1100)	1.32e-08	0.000701152	0.863442	0.338942	1.83624e-05	0.101242	5.18893e-07	7.78592e-07	0.360476	9.83582e-05
	BRCA-Basal (n=191)	0.417055	0.27004	0.144055	0.0581273	0.288924	0.118898	0.303116	0.348181	-0.00162688	0.342491			BRCA-Basal (n=191)	5.83765e-08	0.000804794	0.0981421	0.545734	0.000332066	0.184599	0.000154529	1.03223e-05	0.985466	1.52246e-05
	BRCA-Her2 (n=82)	0.0340309	0.16574	-0.0577787	0.019291	0.097588	-0.0990724	0.0951704	0.106091	-0.0821799	0.148528			BRCA-Her2 (n=82)	0.851257	0.243125	0.717654	0.91735	0.518469	0.512804	0.531445	0.477834	0.589866	0.3001
	BRCA-LumA (n=568)	0.0656357	-0.00203484	-0.0666503	-0.100378	0.0412128	0.020124	0.0642553	0.065434	-0.024438	0.00251653			BRCA-LumA (n=568)	0.20739	0.977854	0.200449	0.0410111	0.451199	0.734304	0.217397	0.208077	0.671658	0.97645
	BRCA-LumB (n=219)	0.305638	0.150273	0.00440565	0.00352085	0.183645	0.172555	0.21628	0.177117	-0.063985	0.201297			BRCA-LumB (n=219)	5.85662e-05	0.0660464	0.97645	0.977854	0.0208159	0.0312054	0.00562283	0.0262636	0.479911	0.0103839
	CESC (n=306)	0.354263	0.288068	-0.0103553	0.25825	0.390638	0.224262	0.286846	0.334851	0.31594	0.36733			CESC (n=306)	8.38968e-09	4.85344e-06	0.916471	4.93334e-05	1.33057e-10	0.00046195	5.35363e-06	6.14466e-08	4.08131e-07	2.05804e-09
	CHOL (n=36)	0.167134	0.170172	-0.200601	0.00306124	0.0155304	-0.186447	0.11224	0.124909	0.116396	0.179039			CHOL (n=36)	0.439395	0.429283	0.340757	0.986075	0.965653	0.37931	0.616465	0.575327	0.60178	0.401906
	COAD (n=458)	0.28073	0.095131	-0.285548	-0.0599557	0.342303	-0.118118	0.216989	0.290988	0.306111	0.164931			COAD (n=458)	9.57199e-06	0.181887	6.4218e-06	0.423517	3.21327e-08	0.0868662	0.000749804	4.13623e-06	1.06805e-06	0.0121138
	DLBC (n=48)	0.325756	0.345159	0.010153	0.178858	0.542486	0.0430674	0.217361	0.361159	0.557459	0.168349			DLBC (n=48)	0.0660888	0.0488171	0.97645	0.359304	0.000667036	0.860153	0.253251	0.0375003	0.000433933	0.389007
	ESCA (n=185)	0.221696	0.172613	-0.023167	0.0910251	0.301268	-0.0669038	0.326048	0.302849	0.25312	0.250598			ESCA (n=185)	0.00601328	0.0376079	0.839395	0.313667	0.000129913	0.476694	2.99906e-05	0.000119714	0.00146354	0.00163624
	GBM (n=153)	0.0136975	0.127904	-0.144381	-0.0957253	0.0255894	-0.0508995	0.0389949	-0.156391	-0.211147	-0.0248352			GBM (n=153)	0.91735	0.20739	0.149505	0.360476	0.847076	0.648807	0.73556	0.11287	0.0250157	0.851257
	HNSC (n=522)	0.367089	0.181417	-0.141091	0.231844	0.424271	0.0602463	0.429791	0.419795	-0.299163	0.202237			HNSC (n=522)	6.16073e-16	0.000164395	0.00376828	9.69531e-07	1.98043e-21	0.263997	5.15846e-22	5.7306e-21	1.08445e-10	2.36466e-05
	HNSC-HPV- (n=422)	0.333738	0.142496	-0.159485	0.188065	0.401072	-0.0123787	0.430601	0.403387	-0.301941	0.170956			HNSC-HPV- (n=422)	6.50561e-11	0.00881168	0.00310336	0.000435865	9.79762e-16	0.864252	4.08075e-18	6.74263e-16	4.71743e-09	0.00144327
	HNSC-HPV+ (n=98)	0.393707	0.303679	-0.0561551	0.26751	0.436523	0.249125	0.317065	0.397518	-0.203754	0.238928			HNSC-HPV+ (n=98)	0.000394255	0.00803181	0.689043	0.0215595	6.7201e-05	0.0343696	0.00539126	0.000342096	0.0944165	0.0436866
	KICH (n=66)	0.0888195	-0.0543037	0.14941	-0.0403554	0.128327	-0.0435522	0.180346	0.0771441	-0.00474438	0.00391225			KICH (n=66)	0.580352	0.749958	0.326219	0.832884	0.407027	0.816185	0.22554	0.634994	0.979878	0.982696
	KIRC (n=533)	0.328193	0.283609	0.157979	0.209613	0.3926	0.418782	0.39566	0.382819	0.152524	0.324308			KIRC (n=533)	5.1347e-12	3.81421e-09	0.00158978	2.19632e-05	3.69247e-17	1.41548e-19	1.99782e-17	2.66703e-16	0.00232954	9.23126e-12
	KIRP (n=290)	0.278549	0.115471	0.0157662	0.00776137	0.296171	-0.148232	0.402466	0.377805	0.220367	0.249337			KIRP (n=290)	2.17838e-05	0.107172	0.863632	0.938819	5.6156e-06	0.0319855	1.48889e-10	2.44229e-09	0.000922162	0.000164144
	LGG (n=516)	-0.0807058	-0.0520298	-0.0119125	-0.160763	-0.0830152	-0.472898	0.0401414	0.0356056	-0.438314	0.0547649			LGG (n=516)	0.126738	0.351011	0.863442	0.00104455	0.115333	3.5072e-26	0.48254	0.541621	2.67133e-22	0.323413
	LIHC (n=371)	0.318432	0.178144	0.0455984	0.141452	0.26123	-0.0417553	0.364408	0.33372	0.379205	0.275814			LIHC (n=371)	9.10307e-09	0.00205542	0.502828	0.0166901	3.97454e-06	0.542552	2.63725e-11	1.50134e-09	3.49048e-12	9.54178e-07
	LUAD (n=515)	0.137618	0.0918403	-0.192441	-0.142252	0.179507	-0.034454	0.171182	0.21096	0.189472	0.0837501			LUAD (n=515)	0.0048251	0.0725207	6.03631e-05	0.00344637	0.00019121	0.545734	0.000393395	9.66688e-06	7.90369e-05	0.106143
	LUSC (n=501)	0.26487	0.160765	-0.172544	0.0617257	0.324283	0.0738756	0.297584	0.339023	0.263474	0.206763			LUSC (n=501)	2.48842e-08	0.00105253	0.000433933	0.260363	4.26945e-12	0.169975	2.57724e-10	3.28342e-13	2.97557e-08	2.09227e-05
	MESO (n=87)	0.443216	0.144688	-0.171708	0.068387	0.192756	0.401248	0.210802	0.232593	0.164681	0.358115			MESO (n=87)	7.56835e-05	0.269232	0.18213	0.628252	0.126463	0.00040973	0.0906459	0.0569621	0.202361	0.00178974
	OV (n=303)	-0.0566948	0.0338915	-0.0282681	-0.0987228	-0.0572331	0.216922	-0.00140807	-0.0597604	-0.0349623	-0.0864861			OV (n=303)	0.476694	0.683386	0.740405	0.18714	0.473935	0.00138321	0.985466	0.450071	0.671983	0.254505
	PAAD (n=179)	0.281634	0.0424015	-0.042854	0.167992	0.343361	-0.0562101	0.325861	0.384411	0.253385	0.226998			PAAD (n=179)	0.00052116	0.671983	0.671658	0.0501253	1.72634e-05	0.565654	4.9677e-05	1.00907e-06	0.00192136	0.00608469
	PCPG (n=181)	0.00293404	0.0394176	-0.00986657	0.109622	0.338677	0.0189485	0.297841	0.22383	-0.149887	0.0305375			PCPG (n=181)	0.979878	0.700601	0.938819	0.236519	2.88617e-05	0.864252	0.000285007	0.00770365	0.0909263	0.778976
	PRAD (n=498)	0.169394	0.063287	-0.0278738	-0.108214	0.302496	0.185201	0.20553	0.267244	0.0401933	0.127244			PRAD (n=498)	0.00127869	0.281383	0.665622	0.0489947	2.13514e-09	0.000418211	8.11518e-05	1.70229e-07	0.518469	0.0182632
	READ (n=166)	0.100447	0.172566	-0.123511	0.0682861	0.373438	0.00556674	0.113241	0.214895	0.31011	0.298674			READ (n=166)	0.449608	0.165506	0.339494	0.616509	0.000749804	0.977854	0.383887	0.0729577	0.00624319	0.00878658
	SARC (n=260)	0.43316	0.182372	0.0152938	0.21527	0.366904	0.00405664	0.368169	0.296557	0.0971265	0.317181			SARC (n=260)	1.33265e-11	0.00878658	0.866268	0.00167398	2.05292e-08	0.97645	1.8238e-08	1.00677e-05	0.200449	1.94649e-06
	SKCM (n=471)	0.493148	0.189479	0.162012	0.306205	0.521634	0.315413	0.551775	0.544432	0.182484	0.471934			SKCM (n=471)	1.77343e-27	0.000148683	0.00125233	1.79363e-10	3.96976e-31	4.6869e-11	3.62866e-35	2.51904e-34	0.000270768	5.01974e-25
	SKCM-Metastasis (n=368)	0.447131	0.193439	0.213176	0.370675	0.514672	0.314428	0.517087	0.537865	0.147224	0.446868			SKCM-Metastasis (n=368)	1.8625e-17	0.000669155	0.000166013	5.82657e-12	9.85911e-24	9.10307e-09	5.99982e-24	3.53711e-26	0.0110288	1.8625e-17
	SKCM-Primary (n=103)	0.365138	0.0669671	0.139836	0.223217	0.346228	0.307925	0.406057	0.350913	0.137772	0.355244			SKCM-Primary (n=103)	0.000450422	0.601379	0.239383	0.0436866	0.000922756	0.00364769	7.90369e-05	0.000771879	0.246964	0.000667036
	STAD (n=415)	0.400267	0.27295	0.00396736	0.181491	0.442923	0.0818834	0.418786	0.418736	0.540732	0.393492			STAD (n=415)	7.01461e-15	3.57251e-07	0.972682	0.000964999	3.04027e-18	0.176277	2.66703e-16	2.66703e-16	3.66253e-28	2.24707e-14
	TGCT (n=150)	-0.108805	-0.213539	-0.137251	0.121259	0.146091	-0.0590903	0.00489023	0.137158	-0.105008	-0.235978			TGCT (n=150)	0.272775	0.0182632	0.156162	0.216535	0.126463	0.576584	0.97645	0.156162	0.291616	0.00839705
	THCA (n=509)	0.330258	0.243186	-0.0590057	0.0817407	0.366772	0.0981641	0.271551	0.283092	-0.319705	0.348426			THCA (n=509)	8.224e-13	2.87587e-07	0.276941	0.117227	8.17405e-16	0.0535893	7.02778e-09	1.44157e-09	5.02724e-12	2.80622e-14
	THYM (n=120)	0.0154457	0.0257625	-0.252245	0.0127301	0.261259	-0.258987	-0.292884	-0.257495	-0.312385	-0.114512			THYM (n=120)	0.91735	0.857512	0.0128789	0.934648	0.00979335	0.01049	0.00335001	0.0109883	0.0016113	0.312974
	UCEC (n=545)	0.313882	0.0262654	-0.0694215	0.404201	0.530872	-0.0207566	0.347768	0.448308	0.0799532	0.291459			UCEC (n=545)	0.00620563	0.864252	0.616465	0.00028705	5.3029e-07	0.901895	0.0020695	4.3919e-05	0.559759	0.0116757
	UCS (n=57)	-0.154401	-0.387559	-0.0228972	-0.153945	0.0662099	0.0475789	0.174251	0.153081	0.110517	0.106985			UCS (n=57)	0.364382	0.00862806	0.91735	0.365083	0.72456	0.819085	0.299749	0.367526	0.535167	0.545734
	UVM (n=80)	0.555664	0.148892	0.423164	0.3605	0.509246	0.288912	0.675428	0.547265	0.190209	0.461982			UVM (n=80)	7.78592e-07	0.280328	0.000373096	0.00290675	9.57199e-06	0.0208159	1.33846e-10	1.22431e-06	0.156162	8.00973e-05

## Sheet: DC
Coefficients														Adj.P
	cancer	Myeloid dendritic cell activated_CIBERSORT	Myeloid dendritic cell activated_CIBERSORT-ABS	Myeloid dendritic cell activated_XCELL	Myeloid dendritic cell resting_CIBERSORT	Myeloid dendritic cell resting_CIBERSORT-ABS	Myeloid dendritic cell_MCPCOUNTER	Myeloid dendritic cell_QUANTISEQ	Myeloid dendritic cell_TIMER	Myeloid dendritic cell_XCELL	Plasmacytoid dendritic cell_XCELL				cancer	Myeloid dendritic cell activated_CIBERSORT	Myeloid dendritic cell activated_CIBERSORT-ABS	Myeloid dendritic cell activated_XCELL	Myeloid dendritic cell resting_CIBERSORT	Myeloid dendritic cell resting_CIBERSORT-ABS	Myeloid dendritic cell_MCPCOUNTER	Myeloid dendritic cell_QUANTISEQ	Myeloid dendritic cell_TIMER	Myeloid dendritic cell_XCELL	Plasmacytoid dendritic cell_XCELL
	ACC (n=79)	0.209044	0.158421	-0.106657	-0.129708	-0.130473	-0.294533	0.252574	-0.175961	-0.304141	0.0208179				ACC (n=79)	0.120372	0.25321	0.456247	0.357643	0.357452	0.0240582	0.0578336	0.198214	0.0192589	0.874405
	BLCA (n=408)	-0.288952	-0.189875	0.518131	0.0712816	0.131225	0.458832	-0.0572306	0.385595	0.439281	0.355816				BLCA (n=408)	7.82362e-08	0.000744757	3.24851e-25	0.24333	0.0246055	2.33682e-19	0.357643	1.7488e-13	1.21918e-17	1.66368e-11
	BRCA (n=1100)	-0.0727913	-0.0681664	0.235563	0.0240851	0.0749091	0.237385	0.0492465	0.313929	0.196447	0.186873				BRCA (n=1100)	0.0419572	0.0582995	5.17454e-13	0.534022	0.0359852	3.34814e-13	0.180676	7.49277e-23	2.73502e-09	1.63074e-08
	BRCA-Basal (n=191)	-0.134741	-0.116739	0.469542	0.0391694	0.0850363	0.356647	0.0351641	0.418046	0.329394	0.466518				BRCA-Basal (n=191)	0.12049	0.185663	4.74996e-10	0.666452	0.349837	5.47827e-06	0.697639	4.83947e-08	3.25282e-05	6.28999e-10
	BRCA-Her2 (n=82)	0.104563	0.103572	0.174099	0.0768693	0.101574	0.129707	-0.197781	0.245543	0.15606	0.137185				BRCA-Her2 (n=82)	0.470764	0.474904	0.207788	0.580229	0.481836	0.360943	0.146714	0.0668417	0.262362	0.332336
	BRCA-LumA (n=568)	-0.0450846	-0.0438771	0.125294	-0.0375693	0.0101874	0.0892893	0.0446552	0.240457	0.0869885	0.153624				BRCA-LumA (n=568)	0.395718	0.406117	0.0101318	0.48096	0.836159	0.0734066	0.400407	1.43535e-07	0.0820871	0.00128683
	BRCA-LumB (n=219)	-0.110506	-0.10945	0.30898	0.132278	0.180819	0.362226	0.0684082	0.274128	0.245587	0.11956				BRCA-LumB (n=219)	0.187956	0.191119	4.56913e-05	0.109496	0.0251668	1.04123e-06	0.435508	0.000376793	0.00167025	0.150322
	CESC (n=306)	-0.259488	-0.189675	0.418916	0.142694	0.197084	0.258557	0.0411947	0.457298	0.339511	0.292476				CESC (n=306)	4.32772e-05	0.00382158	3.0619e-12	0.0349713	0.00256939	4.57991e-05	0.563051	1.15306e-14	3.53494e-08	3.03786e-06
	CHOL (n=36)	0.119222	0.111972	0.404426	0.456904	0.444276	0.247809	0.0724039	0.0926609	0.364646	0.368796				CHOL (n=36)	0.563051	0.580229	0.0324222	0.0131027	0.016404	0.217244	0.724165	0.655835	0.0578741	0.054915
	COAD (n=458)	-0.147234	-0.122362	0.60342	0.0408201	0.105608	0.641864	0.0477018	0.630995	0.600492	0.0978003				COAD (n=458)	0.0298151	0.0734126	4.58317e-27	0.565605	0.125037	1.97583e-31	0.516395	3.43246e-30	8.90271e-27	0.159793
	DLBC (n=48)	0.110822	0.113577	0.196341	0.299961	0.305881	0.16142	-0.064707	0.367962	-0.254698	0.271353				DLBC (n=48)	0.563051	0.561337	0.294887	0.0932911	0.0873307	0.402275	0.729912	0.0356907	0.162882	0.132877
	ESCA (n=185)	-0.331691	-0.164605	0.47533	0.156008	0.193352	0.428411	-0.105952	0.357752	0.405073	0.10925				ESCA (n=185)	1.99075e-05	0.0513755	1.21494e-10	0.065145	0.0200204	1.15852e-08	0.223021	3.36592e-06	7.94333e-08	0.208109
	GBM (n=153)	-0.078224	-0.0724227	0.25952	-0.0659729	-0.059864	0.0604741	0.0283864	0.336452	0.146435	0.307367				GBM (n=153)	0.452184	0.484295	0.00529589	0.530313	0.563051	0.563051	0.775052	0.000193173	0.134815	0.000762572
	HNSC (n=522)	-0.157576	-0.0520709	0.38284	-0.0201841	0.125365	0.369904	0.172883	0.0936041	0.326913	0.264964				HNSC (n=522)	0.00128232	0.332092	1.69009e-17	0.706645	0.0121867	2.64014e-16	0.000369945	0.0671092	9.44789e-13	1.3551e-08
	HNSC-HPV- (n=422)	-0.134746	-0.0366551	0.36272	-0.0462776	0.088314	0.352149	0.161832	0.0953708	0.305243	0.22967				HNSC-HPV- (n=422)	0.0154733	0.550503	6.6157e-13	0.445471	0.121748	3.48504e-12	0.00298468	0.0932911	2.8968e-09	1.32549e-05
	HNSC-HPV+ (n=98)	-0.24471	-0.123346	0.38895	0.117543	0.246751	0.351614	0.222304	0.24161	0.328797	0.316477				HNSC-HPV+ (n=98)	0.0404236	0.332092	0.000513856	0.357643	0.0385277	0.00199835	0.0650328	0.0429364	0.00411769	0.00599453
	KICH (n=66)	-0.12636	-0.0821374	0.407774	-0.0180013	-0.0204701	0.263967	0.0383452	0.438512	0.318607	0.126051				KICH (n=66)	0.404214	0.579452	0.00202322	0.895825	0.882511	0.0610816	0.787971	0.000762572	0.0207383	0.404443
	KIRC (n=533)	-0.15672	-0.152113	0.40992	0.199063	0.20861	0.261346	0.0747731	0.457492	0.289296	0.212918				KIRC (n=533)	0.00200002	0.00275477	6.34869e-19	5.71302e-05	2.2937e-05	6.04859e-08	0.163497	7.87938e-24	1.67743e-09	1.51074e-05
	KIRP (n=290)	-0.158049	-0.150945	0.458072	0.195985	0.204704	0.477052	0.101395	0.512713	0.389519	0.190749				KIRP (n=290)	0.0234371	0.0311001	9.33737e-14	0.00390284	0.00251753	5.49519e-15	0.158257	1.46459e-17	6.34277e-10	0.00506917
	LGG (n=516)	0.0934845	0.0981961	0.4721	0.0656231	0.0691551	0.227626	0.0829422	0.604811	0.0414971	0.172847				LGG (n=516)	0.0717115	0.0583924	2.20191e-26	0.217474	0.191119	2.07914e-06	0.112832	2.04201e-46	0.452952	0.000457659
	LIHC (n=371)	-0.150126	-0.150107	0.320862	-0.0455874	0.00300493	0.329885	0.0183284	0.311171	0.242419	0.321351				LIHC (n=371)	0.0119142	0.0119142	6.38966e-09	0.483674	0.958058	2.25743e-09	0.769228	1.93708e-08	1.95308e-05	6.1013e-09
	LUAD (n=515)	-0.0888322	-0.02872	0.394892	0.252665	0.319803	0.439163	-0.0851374	0.535061	0.50405	0.19986				LUAD (n=515)	0.0828164	0.581641	1.11745e-18	6.22454e-08	3.07164e-12	2.72162e-23	0.0960638	1.45884e-35	2.63524e-31	2.80972e-05
	LUSC (n=501)	-0.138294	-0.0692862	0.359633	0.0611342	0.149231	0.44546	-0.0382724	0.379164	0.432358	0.248688				LUSC (n=501)	0.00592169	0.191119	6.08816e-15	0.254934	0.00278914	2.76068e-23	0.487591	1.19844e-16	7.54083e-22	1.66137e-07
	MESO (n=87)	0.0333001	0.0398777	0.235265	0.136179	0.144072	0.274268	0.020363	0.388257	0.37538	0.269857				MESO (n=87)	0.787971	0.753329	0.0564318	0.290649	0.261189	0.023461	0.868523	0.000726474	0.0011479	0.0259159
	OV (n=303)	0.0434718	0.0513382	-0.0300626	-0.114773	-0.113645	-0.0549119	0.123454	0.0435042	-0.0792654	-0.129477				OV (n=303)	0.563051	0.50492	0.69065	0.113324	0.117259	0.475463	0.0873307	0.563051	0.289773	0.0717115
	PAAD (n=179)	-0.0545789	-0.0239315	0.420318	0.0932001	0.16214	0.425207	0.0323103	0.417766	0.439821	-0.0143475				PAAD (n=179)	0.561337	0.785643	5.20194e-08	0.30299	0.0617123	3.53494e-08	0.723946	6.26981e-08	1.04361e-08	0.868523
	PCPG (n=181)	-0.171679	-0.135861	0.427774	0.102049	0.102817	0.285645	0.0525686	0.071291	0.433088	0.0282587				PCPG (n=181)	0.0502749	0.124873	4.19302e-08	0.26177	0.258976	0.000563496	0.565605	0.449047	2.71354e-08	0.753329
	PRAD (n=498)	-0.0362765	-0.0204461	0.343287	0.0746461	0.131529	0.487093	0.0353584	0.453705	0.297533	0.0927848				PRAD (n=498)	0.54718	0.724165	5.07549e-12	0.189424	0.0159752	9.50594e-25	0.556482	2.95116e-21	3.71739e-09	0.0960552
	READ (n=166)	-0.321072	-0.274248	0.54212	0.144292	0.202968	0.568739	0.0136242	0.542419	0.440772	0.163347				READ (n=166)	0.00499228	0.0192589	1.54573e-07	0.245871	0.0916418	2.71235e-08	0.905409	1.53142e-07	4.75757e-05	0.184787
	SARC (n=260)	-0.0413795	-0.0310679	0.385312	0.0311094	0.0440468	0.466644	0.224839	0.403067	0.423646	0.178743				SARC (n=260)	0.580229	0.684233	2.94534e-09	0.684233	0.563051	1.40893e-13	0.0011479	4.6008e-10	3.80834e-11	0.0118139
	SKCM (n=471)	-0.221715	-0.220652	0.436085	0.0837564	0.154394	0.494302	-0.152626	0.294099	0.228827	0.360772				SKCM (n=471)	6.75651e-06	7.51904e-06	2.32507e-21	0.117259	0.00249641	6.94228e-28	0.00276782	1.00119e-09	3.17118e-06	1.88718e-14
	SKCM-Metastasis (n=368)	-0.102388	-0.1017	0.336856	0.194677	0.239549	0.473752	-0.169111	0.274417	0.223028	0.298285				SKCM-Metastasis (n=368)	0.0907543	0.0927322	5.66435e-10	0.0006943	1.94196e-05	5.74148e-20	0.00356221	6.80148e-07	7.7796e-05	5.20194e-08
	SKCM-Primary (n=103)	-0.232956	-0.230955	0.374302	0.0371916	0.116827	0.236826	-0.245783	0.142716	0.13628	0.285443				SKCM-Primary (n=103)	0.0363715	0.0382708	0.000341474	0.752126	0.324643	0.0334366	0.0263421	0.217474	0.24333	0.00856472
	STAD (n=415)	-0.190158	-0.122028	0.515967	0.199089	0.262001	0.592667	0.0662944	0.576001	0.547864	0.239195				STAD (n=415)	0.000600847	0.0349713	1.10317e-25	0.000308473	9.88936e-07	3.44694e-35	0.270567	7.01977e-33	2.24819e-29	9.6761e-06
	TGCT (n=150)	-0.0553258	-0.0535271	-0.030106	0.0265432	0.0596987	-0.00700919	-0.230934	-0.0193526	0.0342459	-0.0878475				TGCT (n=150)	0.570148	0.580229	0.753329	0.781028	0.556482	0.937563	0.0113824	0.836159	0.724165	0.376004
	THCA (n=509)	-0.177012	-0.121155	0.40417	0.0924262	0.164125	0.266954	0.154123	0.145219	0.278009	0.220587				THCA (n=509)	0.000277813	0.0162174	2.21173e-19	0.0717115	0.00079458	1.20187e-08	0.00176619	0.00330676	2.73502e-09	3.49358e-06
	THYM (n=120)	-0.0901131	-0.0901131	0.0526309	-0.186543	-0.0396859	-0.27266	0.326757	-0.197304	-0.170335	-0.121695				THYM (n=120)	0.4273	0.4273	0.635496	0.0787724	0.723946	0.00757517	0.00106045	0.0622274	0.111241	0.267778
	UCEC (n=545)	-0.356183	-0.29112	0.404166	0.219558	0.228485	0.416437	-0.0521804	0.244257	0.324351	0.329803				UCEC (n=545)	0.0018224	0.0133281	0.000307156	0.070171	0.0589016	0.000182164	0.684233	0.0419572	0.00500394	0.00420685
	UCS (n=57)	-0.130768	-0.0856317	0.367686	0.0404588	0.0354313	0.238862	0.00722667	0.266282	0.173262	-0.0959967				UCS (n=57)	0.440253	0.599304	0.0151096	0.797674	0.823912	0.1316	0.959041	0.0905888	0.290671	0.563051
	UVM (n=80)	NA	NA	0.574995	0.369179	0.44778	0.690291	0.0803294	-0.202334	0.504945	0.260882				UVM (n=80)	NA	NA	1.99946e-07	0.00252824	0.000149717	3.06849e-11	0.563051	0.121748	1.09171e-05	0.0419572

## Sheet: M
Coefficients																			Adj.P
	cancer	Macrophage M0_CIBERSORT	Macrophage M0_CIBERSORT-ABS	Macrophage M1_CIBERSORT	Macrophage M1_CIBERSORT-ABS	Macrophage M1_QUANTISEQ	Macrophage M1_XCELL	Macrophage M2_CIBERSORT	Macrophage M2_CIBERSORT-ABS	Macrophage M2_QUANTISEQ	Macrophage M2_TIDE	Macrophage M2_XCELL	Macrophage_EPIC	Macrophage_TIMER	Macrophage_XCELL	Macrophage/Monocyte_MCPCOUNTER				cancer	Macrophage M0_CIBERSORT	Macrophage M0_CIBERSORT-ABS	Macrophage M1_CIBERSORT	Macrophage M1_CIBERSORT-ABS	Macrophage M1_QUANTISEQ	Macrophage M1_XCELL	Macrophage M2_CIBERSORT	Macrophage M2_CIBERSORT-ABS	Macrophage M2_QUANTISEQ	Macrophage M2_TIDE	Macrophage M2_XCELL	Macrophage_EPIC	Macrophage_TIMER	Macrophage_XCELL	Macrophage/Monocyte_MCPCOUNTER
	ACC (n=79)	0.1823	0.181493	-0.102401	-0.129082	-0.0376081	0.146104	-0.068273	-0.254803	-0.553738	0.437413	-0.0349649	0.115489	-0.178133	0.0803436	-0.359629				ACC (n=79)	0.153341	0.155133	0.43023	0.318945	0.783423	0.25782	0.607532	0.0418757	9.1303e-07	0.000208953	0.798277	0.371428	0.163489	0.54166	0.00301466
	BLCA (n=408)	-0.0636136	0.0534611	0.220146	0.365274	0.404431	0.490552	0.231141	0.595073	0.450115	-0.33712	0.332823	0.53366	0.169245	0.473972	0.439648				BLCA (n=408)	0.263919	0.348843	4.16479e-05	1.94201e-12	3.30069e-15	9.6978e-23	1.63026e-05	2.81089e-35	6.48858e-19	1.07214e-10	1.92066e-10	2.22677e-27	0.00193196	4.12754e-21	5.08482e-18
	BRCA (n=1100)	0.0122879	0.111353	0.021184	0.178524	0.254642	0.338453	0.174036	0.441836	0.329161	-0.283937	0.362454	0.498266	0.194211	0.434356	0.434172				BRCA (n=1100)	0.734293	0.000792842	0.546603	3.91087e-08	1.8367e-15	5.53544e-27	8.65461e-08	8.05068e-47	1.59237e-25	4.8725e-19	5.026e-31	5.11466e-61	2.02511e-09	3.53116e-45	3.53116e-45
	BRCA-Basal (n=191)	-0.108062	0.119604	0.267445	0.473548	0.447063	0.637517	0.0892404	0.506733	0.527146	-0.534793	0.509162	0.641956	0.0674462	0.657692	0.594287				BRCA-Basal (n=191)	0.189621	0.146166	0.000665034	1.40048e-10	1.91264e-09	2.34017e-20	0.283116	3.83962e-12	3.44379e-13	1.34291e-13	2.94891e-12	1.04283e-20	0.418389	5.40179e-22	3.17844e-17
	BRCA-Her2 (n=82)	-0.00659457	0.0754604	-0.0531003	0.109995	0.0492237	0.248011	0.174868	0.263502	0.1826	-0.121661	0.0827922	0.192857	0.159016	0.243521	0.246717				BRCA-Her2 (n=82)	0.956156	0.571565	0.69728	0.400388	0.717215	0.0494421	0.174324	0.0361757	0.155261	0.350082	0.531858	0.13265	0.218259	0.0535535	0.0506014
	BRCA-LumA (n=568)	0.0445407	0.0910011	-0.0731008	0.0604575	0.209153	0.314226	0.271657	0.433023	0.3712	-0.257807	0.346068	0.509204	0.271173	0.403395	0.451152				BRCA-LumA (n=568)	0.352669	0.0530637	0.123634	0.205916	3.655e-06	1.1074e-12	1.06668e-09	4.56167e-24	1.46347e-17	7.65507e-09	2.78675e-15	3.73378e-34	1.13749e-09	9.2413e-21	3.04829e-26
	BRCA-LumB (n=219)	-0.0684807	0.0581623	-0.0209213	0.167282	0.195099	0.297953	0.221358	0.459898	0.403709	-0.17946	0.423282	0.461027	0.181227	0.473826	0.391848				BRCA-LumB (n=219)	0.387216	0.464766	0.799988	0.0297609	0.0105374	5.47474e-05	0.00342406	6.75626e-11	1.78054e-08	0.0189821	2.84902e-09	5.98175e-11	0.0178681	1.42731e-11	5.03149e-08
	CESC (n=306)	-0.131746	-0.00789173	0.304058	0.41309	0.0934828	0.45305	0.166391	0.403527	0.401178	-0.255195	0.393424	0.516682	0.23554	0.485322	0.282533				CESC (n=306)	0.0404106	0.9035	6.08622e-07	3.09346e-12	0.151707	9.92225e-15	0.00870802	1.05569e-11	1.42988e-11	3.52978e-05	3.88932e-11	1.87663e-19	0.000148022	5.12126e-17	3.99389e-06
	CHOL (n=36)	-0.389231	-0.266854	0.198491	0.230789	0.177701	0.381824	0.331832	0.422171	0.0467808	-0.174276	0.312229	0.3579	0.257753	0.350737	-0.0507266				CHOL (n=36)	0.0302597	0.151892	0.294203	0.218259	0.349008	0.0340557	0.0687977	0.0173808	0.811214	0.356502	0.0890736	0.0484121	0.167283	0.0532199	0.799988
	COAD (n=458)	0.0547071	0.430992	0.212009	0.480975	0.22811	0.607685	0.411683	0.697599	0.499846	-0.377805	0.401236	0.67801	0.527599	0.577348	0.702998				COAD (n=458)	0.407742	3.22331e-13	0.000734972	1.38009e-16	0.000257547	5.00783e-28	4.42588e-12	5.83668e-40	5.4758e-18	1.55718e-14	1.68671e-11	5.66538e-37	3.035e-20	7.38633e-25	9.44204e-41
	DLBC (n=48)	-0.0448428	0.118291	0.680557	0.71644	0.469617	0.41537	0.0318059	0.444912	-0.176585	-0.646863	0.0707113	0.475716	-0.437588	0.374977	0.406396				DLBC (n=48)	0.804855	0.502394	2.26152e-06	3.47128e-07	0.00329613	0.0108701	0.861865	0.00579833	0.312052	1.07354e-05	0.698866	0.00284516	0.00679097	0.023099	0.0130169
	ESCA (n=185)	-0.0428487	0.170682	0.317842	0.445159	0.193022	0.467924	0.249426	0.517845	0.315371	-0.208947	0.359423	0.565856	0.409995	0.402477	0.448302				ESCA (n=185)	0.608474	0.0318463	2.9042e-05	1.18691e-09	0.0145066	1.19853e-10	0.00129883	4.23354e-13	3.34374e-05	0.00776469	1.7004e-06	6.87919e-16	2.99478e-08	5.61259e-08	8.85764e-10
	GBM (n=153)	-0.186692	-0.16686	0.0777824	0.163838	0.276311	0.257372	0.0906827	0.387053	0.398128	-0.390983	0.228071	0.36256	0.371022	0.320611	0.493906				GBM (n=153)	0.0411371	0.0687247	0.407742	0.0743211	0.00188115	0.00399337	0.334929	6.62e-06	3.32108e-06	5.18142e-06	0.0114876	2.83602e-05	1.75469e-05	0.000254597	2.58553e-09
	HNSC (n=522)	-0.224708	0.0668041	0.157657	0.373755	0.196506	0.391976	0.163837	0.502114	0.382218	-0.195251	0.266417	0.522089	0.10912	0.383943	0.332961				HNSC (n=522)	1.14013e-06	0.171557	0.000812049	5.26913e-17	2.43201e-05	1.10315e-18	0.000489541	1.41972e-31	8.95655e-18	2.7432e-05	5.55733e-09	1.95058e-34	0.0228432	6.22862e-18	1.51016e-13
	HNSC-HPV- (n=422)	-0.217428	0.0840195	0.132736	0.344254	0.215322	0.397069	0.203047	0.497295	0.330225	-0.19654	0.271636	0.512192	0.141546	0.378547	0.301018				HNSC-HPV- (n=422)	2.45647e-05	0.119651	0.0122434	5.57071e-12	2.94533e-05	7.97367e-16	8.50841e-05	2.27331e-25	4.42239e-11	0.000148231	8.73721e-08	4.79309e-27	0.00732073	2.14661e-14	2.42896e-09
	HNSC-HPV+ (n=98)	-0.165452	0.0142197	0.209473	0.421282	0.083976	0.366188	0.0354575	0.500589	0.591842	-0.198412	0.225221	0.523456	0.0137014	0.409616	0.422727				HNSC-HPV+ (n=98)	0.151892	0.9035	0.065532	7.81882e-05	0.475152	0.000760162	0.776429	1.39069e-06	2.99616e-09	0.0825584	0.0472107	3.53562e-07	0.904625	0.000132157	7.33185e-05
	KICH (n=66)	0.205444	0.218408	-0.0609846	0.108388	0.251885	0.367391	0.397802	0.489355	0.0968041	-0.269098	0.26932	0.526339	0.233824	0.260473	0.405592				KICH (n=66)	0.128202	0.104079	0.671948	0.431051	0.0583134	0.00432189	0.00181143	7.04686e-05	0.483612	0.0425202	0.0424214	1.46529e-05	0.0807625	0.0499357	0.00141661
	KIRC (n=533)	-0.0978981	-0.0783753	0.0494842	0.306904	0.295073	0.415192	0.063493	0.401554	0.386652	-0.382661	0.329347	0.507592	0.17795	0.420435	0.46493				KIRC (n=533)	0.0494421	0.119229	0.332227	5.79263e-11	3.33514e-10	8.8901e-20	0.209924	1.82875e-18	4.017e-17	8.93111e-17	1.68976e-12	2.05104e-30	0.000234065	2.66122e-20	4.14981e-25
	KIRP (n=290)	0.0729518	0.160514	-0.0489883	0.128831	0.420126	0.645899	0.391694	0.667704	0.557899	-0.426516	0.345561	0.67764	0.622817	0.555081	0.514904				KIRP (n=290)	0.283748	0.0149756	0.475152	0.0530637	7.13318e-12	1.09189e-30	2.25509e-10	2.2081e-33	1.34244e-21	3.16493e-12	3.24986e-08	1.05815e-34	5.35796e-28	2.38126e-21	4.68486e-18
	LGG (n=516)	-0.129137	-0.127882	-0.0271885	0.0145207	0.502764	0.591295	0.255381	0.361844	0.567138	-0.348704	0.0605908	0.643594	0.221902	0.599488	0.500059				LGG (n=516)	0.00747897	0.00810937	0.5959	0.783423	8.27734e-31	1.14402e-44	3.9666e-08	1.62518e-15	1.64758e-40	1.98729e-14	0.221888	4.47836e-55	2.22001e-06	4.25258e-46	1.87318e-30
	LIHC (n=371)	-0.175871	-0.0950209	0.0630131	0.252618	0.184658	0.27622	0.144925	0.390098	0.368668	-0.194792	0.221719	-0.0443381	0.267957	0.383739	0.198187				LIHC (n=371)	0.00181325	0.101275	0.283748	4.53311e-06	0.00101484	4.58915e-07	0.0109827	2.46294e-13	5.8086e-12	0.000506646	6.54576e-05	0.453214	1.05524e-06	6.50934e-13	0.000398199
	LUAD (n=515)	-0.00643693	0.112428	0.00856951	0.206937	0.332943	0.458012	0.359344	0.623124	0.535607	-0.290073	0.50786	0.686578	0.338076	0.603167	0.442378				LUAD (n=515)	0.898618	0.0186932	0.863868	7.96643e-06	1.43837e-13	6.72411e-26	9.60699e-16	2.73872e-52	1.38215e-36	1.742e-10	1.8413e-32	3.36152e-67	5.63533e-14	3.5872e-48	4.56167e-24
	LUSC (n=501)	-0.0847639	0.124446	0.0925805	0.314292	0.35745	0.503213	0.255963	0.579554	0.478092	-0.27858	0.469285	0.589257	0.309327	0.520612	0.439727				LUSC (n=501)	0.0848577	0.010264	0.0586146	8.12792e-12	4.0413e-15	8.27734e-31	3.85057e-08	1.52657e-42	1.65799e-27	1.83609e-09	1.92708e-26	3.13998e-44	1.77388e-11	3.2365e-33	5.06994e-23
	MESO (n=87)	-0.0352932	-0.0271564	0.307529	0.362526	0.215781	0.554562	0.0146538	0.364697	0.494159	-0.457705	0.517047	0.669069	0.214578	0.594769	0.565703				MESO (n=87)	0.782364	0.824369	0.00676807	0.00115829	0.0638086	9.32821e-08	0.9035	0.0010717	3.50645e-06	2.29165e-05	9.85124e-07	9.60832e-12	0.0653851	5.56424e-09	4.47575e-08
	OV (n=303)	-0.114659	-0.0925567	-0.143751	-0.0788169	-0.107915	0.084807	0.142787	0.17872	0.310378	0.0378836	0.0947214	0.164761	0.127964	0.0643552	0.185868				OV (n=303)	0.0926744	0.177762	0.033664	0.255689	0.114937	0.218259	0.0347056	0.00747617	1.38644e-06	0.595516	0.168358	0.0141862	0.058995	0.352669	0.00534272
	PAAD (n=179)	-0.0918911	0.083708	0.162549	0.286657	0.111711	0.545238	0.184674	0.454327	0.44017	-0.198874	0.456419	0.563432	0.24743	0.596581	0.507068				PAAD (n=179)	0.272883	0.318945	0.0470717	0.000272638	0.177762	5.82636e-14	0.023003	1.33911e-09	4.95146e-09	0.0140982	1.1052e-09	5.17903e-15	0.00191355	4.21056e-17	5.69896e-12
	PCPG (n=181)	-0.0353237	-0.0347725	0.192507	0.276893	0.198461	0.578939	0.0812202	0.414606	0.141995	-0.129747	0.140445	0.622391	0.463387	0.519248	0.379853				PCPG (n=181)	0.693152	0.696668	0.0189369	0.000540412	0.0154013	1.31744e-15	0.339138	6.62985e-08	0.0883916	0.121135	0.0920303	1.82875e-18	9.08731e-10	2.65519e-12	9.98587e-07
	PRAD (n=498)	-0.0602777	0.0219009	0.0430051	0.277872	0.0287185	0.279437	0.117814	0.45598	0.255728	-0.29304	0.0137956	0.501243	0.212152	0.208101	0.128291				PRAD (n=498)	0.260214	0.696668	0.423248	2.25617e-08	0.601238	1.86219e-08	0.0237845	7.88152e-22	3.11154e-07	3.27198e-09	0.804537	8.72102e-27	2.72903e-05	3.86445e-05	0.0136486
	READ (n=166)	0.141422	0.437945	0.263977	0.448782	0.12862	0.565487	0.472197	0.620616	0.438841	-0.357645	0.335904	0.618587	0.316502	0.461006	0.655236				READ (n=166)	0.219509	3.28717e-05	0.0179021	1.98177e-05	0.267564	1.78054e-08	5.84161e-06	2.25509e-10	3.17659e-05	3.2162e-05	0.00208473	2.6688e-10	0.00396951	1.06255e-05	9.1922e-12
	SARC (n=260)	-0.409865	-0.343709	0.347468	0.437267	0.380382	0.559858	0.335967	0.610013	0.50926	-0.403134	0.439555	0.593011	0.454457	0.526898	0.73653				SARC (n=260)	9.1561e-11	9.19448e-08	6.50786e-08	3.23147e-12	2.43007e-09	1.19195e-20	1.91314e-07	2.91577e-25	9.2446e-17	1.98775e-10	2.47915e-12	1.31802e-23	3.41372e-13	5.05296e-18	2.11348e-41
	SKCM (n=471)	-0.235191	0.00490215	0.248103	0.481183	0.437448	0.593518	0.105608	0.574157	0.359044	-0.469988	0.149258	0.576483	0.255733	0.52705	0.678663				SKCM (n=471)	9.01427e-07	0.921372	1.95453e-07	8.65098e-27	7.3954e-22	3.33206e-43	0.034391	5.83668e-40	1.16729e-14	1.78187e-25	0.00235613	2.4942e-40	7.66019e-08	8.75435e-33	1.13191e-60
	SKCM-Metastasis (n=368)	-0.312158	-0.0960133	0.260488	0.443931	0.389744	0.527857	0.168148	0.549558	0.32821	-0.418443	0.0578457	0.587925	0.210637	0.447923	0.61442				SKCM-Metastasis (n=368)	5.55733e-09	0.0926836	1.58341e-06	9.48737e-18	1.26429e-13	9.29422e-26	0.00256006	3.44613e-28	7.93006e-10	1.0311e-15	0.319849	4.99159e-33	0.000128229	4.68486e-18	9.66542e-37
	SKCM-Primary (n=103)	-0.286289	-0.134075	0.104719	0.28698	0.376954	0.525	0.0918156	0.408246	0.170618	-0.467113	0.184206	0.413935	0.25162	0.473241	0.589849				SKCM-Primary (n=103)	0.00577683	0.216237	0.337657	0.00565745	0.000182216	3.94662e-08	0.400806	4.18333e-05	0.111527	1.74649e-06	0.0843598	3.19396e-05	0.0162292	1.21572e-06	2.25509e-10
	STAD (n=415)	-0.0726915	0.149196	0.111036	0.385853	0.149346	0.492772	0.257602	0.603408	0.473072	-0.302747	0.361116	0.568525	0.430625	0.484359	0.610777				STAD (n=415)	0.191718	0.00583751	0.0431117	3.17338e-14	0.00579833	1.2915e-23	9.02851e-07	1.5346e-37	1.28775e-21	5.17701e-09	1.70843e-12	1.3482e-32	9.25172e-18	9.61328e-23	1.09633e-38
	TGCT (n=150)	-0.179899	-0.122128	0.157066	0.17039	0.00716006	0.131113	0.237803	0.272137	0.132228	-0.083787	0.0160894	-0.0946481	0.0315025	0.0863185	-0.016302				TGCT (n=150)	0.0414628	0.173209	0.0764288	0.0534124	0.932965	0.143289	0.00602894	0.00150368	0.139713	0.352997	0.862441	0.294959	0.739354	0.340543	0.861865
	THCA (n=509)	-0.014042	0.136729	0.317931	0.394422	0.141539	0.310005	-0.219789	0.385019	0.342401	-0.2972	0.0742459	0.260295	0.0932959	0.254812	0.579956				THCA (n=509)	0.787179	0.00410613	2.60909e-12	8.94285e-19	0.00292628	9.33169e-12	2.19577e-06	6.70577e-18	3.40181e-14	7.203e-11	0.128872	1.50376e-08	0.0535796	3.09859e-08	1.545e-43
	THYM (n=120)	0.0519056	0.0802838	0.319281	0.379525	0.137269	0.237386	0.466791	0.526192	0.375852	-0.354147	0.200011	0.525443	0.125457	0.355133	0.50772				THYM (n=120)	0.622129	0.434232	0.000907502	5.80924e-05	0.176066	0.0161124	3.61676e-07	4.54873e-09	6.98904e-05	0.000198465	0.045001	4.8204e-09	0.218259	0.000189831	1.92911e-08
	UCEC (n=545)	-0.134345	0.0471378	0.393557	0.481709	0.246705	0.274939	-0.0294214	0.382716	0.251287	-0.388512	0.273116	0.497737	0.323701	0.319953	0.3835				UCEC (n=545)	0.252455	0.700094	0.000280386	4.53632e-06	0.029848	0.0146233	0.808443	0.00043594	0.0266286	1.94126e-11	0.015284	1.88156e-06	0.00352071	0.00396951	0.000423492
	UCS (n=57)	-0.397146	-0.249827	0.334822	0.352406	0.0225558	0.430861	0.310029	0.468564	0.165723	-0.0359449	0.0584951	0.512521	0.331795	0.242833	0.463223				UCS (n=57)	0.00534272	0.0926836	0.0211807	0.0147764	0.885923	0.00219878	0.0343457	0.000735923	0.276691	0.818787	0.714276	0.000169491	0.0225485	0.103373	0.000860905
	UVM (n=80)	-0.133668	0.0106098	0.393426	0.461826	0.388985	0.330591	-0.167449	0.643954	0.378083	-0.523841	0.432631	0.366346	0.0886414	0.616711	0.718843				UVM (n=80)	0.287156	0.930132	0.000734972	4.79945e-05	0.000852676	0.00545619	0.177762	8.51398e-10	0.00123991	2.33011e-06	0.000165825	0.00183118	0.483612	6.6673e-09	7.76552e-13

## Sheet: Neu
Coefficients									Adj.P
	cancer	Neutrophil_CIBERSORT	Neutrophil_CIBERSORT-ABS	Neutrophil_MCPCOUNTER	Neutrophil_QUANTISEQ	Neutrophil_TIMER	Neutrophil_XCELL			cancer	Neutrophil_CIBERSORT	Neutrophil_CIBERSORT-ABS	Neutrophil_MCPCOUNTER	Neutrophil_QUANTISEQ	Neutrophil_TIMER	Neutrophil_XCELL
	ACC (n=79)	-0.177754	-0.178479	-0.0554773	-0.267198	0.0817912	-0.0856235			ACC (n=79)	0.272882	0.272882	0.769952	0.0692094	0.645438	0.636472
	BLCA (n=408)	0.0542796	0.0949059	0.0343861	-0.00229347	0.445882	-0.0430058			BLCA (n=408)	0.476476	0.164872	0.6599	0.980497	4.45487e-18	0.591386
	BRCA (n=1100)	0.044037	0.0548796	0.107311	0.120699	0.3677	0.0399929			BRCA (n=1100)	0.311163	0.190619	0.00390169	0.000881287	2.79191e-31	0.365073
	BRCA-Basal (n=191)	0.172357	0.184485	0.203745	0.0929439	0.475409	-0.032006			BRCA-Basal (n=191)	0.0703314	0.0484944	0.0261677	0.379896	4.49236e-10	0.802649
	BRCA-Her2 (n=82)	0.156528	0.176876	0.0898307	0.0154157	0.181623	-0.151004			BRCA-Her2 (n=82)	0.342505	0.275542	0.629464	0.947728	0.270562	0.363732
	BRCA-LumA (n=568)	0.00735552	0.014323	0.137533	0.131642	0.371107	0.0342085			BRCA-LumA (n=568)	0.938148	0.877421	0.00806666	0.0115589	4.29374e-17	0.61182
	BRCA-LumB (n=219)	-0.0305463	-0.0171491	-0.00543456	0.0891213	0.332578	0.103115			BRCA-LumB (n=219)	0.802649	0.903521	0.969732	0.376494	2.28519e-05	0.300515
	CESC (n=306)	-0.0776689	-0.0438939	-0.053292	-0.0510301	0.323463	-0.108766			CESC (n=306)	0.352219	0.634175	0.559537	0.579344	4.33879e-07	0.1673
	CHOL (n=36)	0.0121773	0.091319	-0.36032	-0.259624	0.104071	0.210613			CHOL (n=36)	0.969732	0.745313	0.0917184	0.272882	0.694203	0.380678
	COAD (n=458)	0.273598	0.316822	0.50294	0.242425	0.585236	0.29074			COAD (n=458)	3.6581e-05	9.01524e-07	8.99815e-18	0.000341106	5.4356e-25	9.66931e-06
	DLBC (n=48)	0.379029	0.414847	0.482623	0.157773	0.575603	0.190489			DLBC (n=48)	0.0482336	0.0261677	0.00680249	0.500326	0.000562719	0.389223
	ESCA (n=185)	-0.117095	-0.0599319	0.0857626	0.00514148	0.285476	-0.192837			ESCA (n=185)	0.257596	0.599878	0.410242	0.969732	0.000680655	0.0333875
	GBM (n=153)	0.111168	0.157993	0.260075	0.0452487	0.340542	0.0775176			GBM (n=153)	0.352055	0.157393	0.00967875	0.745313	0.000337865	0.553048
	HNSC (n=522)	-0.0412607	0.036128	0.0100752	0.0964035	0.450675	-0.197064			HNSC (n=522)	0.546223	0.599878	0.903521	0.0914581	2.2003e-24	9.10343e-05
	HNSC-HPV- (n=422)	0.00766207	0.0892219	0.0256157	0.126161	0.449485	-0.17519			HNSC-HPV- (n=422)	0.941622	0.174284	0.750872	0.0394559	6.57397e-20	0.00251474
	HNSC-HPV+ (n=98)	-0.209017	-0.162182	-0.00651723	-0.0298641	0.376265	-0.185538			HNSC-HPV+ (n=98)	0.126763	0.272622	0.972001	0.895135	0.00166738	0.187808
	KICH (n=66)	0.235801	0.238788	0.0900335	0.222298	0.27642	0.0589607			KICH (n=66)	0.144457	0.137953	0.638718	0.174284	0.0771292	0.769952
	KIRC (n=533)	0.156284	0.199528	0.0917739	0.0640069	0.517273	-0.065011			KIRC (n=533)	0.00410669	0.000131006	0.126763	0.314943	3.9316e-31	0.310054
	KIRP (n=290)	0.0160683	0.0768171	-0.0485192	0.0169423	0.535767	-0.135023			KIRP (n=290)	0.90309	0.376494	0.61182	0.895135	3.11303e-19	0.0857672
	LGG (n=516)	0.146086	0.166399	-0.0975405	NA	0.613726	0.294356			LGG (n=516)	0.00677803	0.00158225	0.0917165	NA	1.97926e-48	6.55778e-10
	LIHC (n=371)	-0.0375972	-0.0123112	-0.16006	-0.011148	0.171856	-0.0204309			LIHC (n=371)	0.645438	0.903521	0.0120298	0.908788	0.00677803	0.834512
	LUAD (n=515)	0.085011	0.156484	0.123211	0.105265	0.433342	0.0210778			LUAD (n=515)	0.14455	0.00277773	0.0245305	0.0609964	1.641e-22	0.769952
	LUSC (n=501)	0.101785	0.188026	0.117361	0.0223575	0.298399	0.097221			LUSC (n=501)	0.0773621	0.000276424	0.035701	0.764917	4.05982e-10	0.0917184
	MESO (n=87)	-0.243105	-0.209813	-0.185496	0.0534171	0.43058	0.0768591			MESO (n=87)	0.0755397	0.137168	0.201111	0.764917	0.000291308	0.645438
	OV (n=303)	0.00546621	0.00799127	0.196919	0.259373	0.043104	0.0431676			OV (n=303)	0.968062	0.947728	0.00824698	0.000272658	0.647335	0.647335
	PAAD (n=179)	0.0616178	0.0716145	0.0833066	0.107363	0.351167	0.0209744			PAAD (n=179)	0.599878	0.535775	0.447025	0.310054	2.28519e-05	0.895135
	PCPG (n=181)	0.0121043	0.0216927	0.170872	-0.0474051	0.194179	0.0802066			PCPG (n=181)	0.941622	0.895135	0.0794423	0.686594	0.0401281	0.478228
	PRAD (n=498)	0.128604	0.131128	-0.0109285	0.135673	0.382613	0.0541703			PRAD (n=498)	0.0308147	0.0272302	0.903521	0.0225901	8.89753e-15	0.436516
	READ (n=166)	0.146115	0.170637	0.276114	0.145466	0.341501	0.14872			READ (n=166)	0.314943	0.240867	0.0305355	0.314943	0.00513004	0.310054
	SARC (n=260)	0.0559784	0.063066	0.150783	-0.173802	0.592973	0.0529057			SARC (n=260)	0.563	0.500326	0.0587554	0.0254478	4.99133e-23	0.591386
	SKCM (n=471)	-0.133122	-0.125979	-0.0989431	-0.0702509	0.541788	-0.00565093			SKCM (n=471)	0.017974	0.0261677	0.0925586	0.272967	3.82171e-34	0.947728
	SKCM-Metastasis (n=368)	-0.00125368	0.0021271	-0.102149	-0.0822678	0.49349	0.0618711			SKCM-Metastasis (n=368)	0.985371	0.980497	0.137953	0.263428	1.05353e-21	0.402051
	SKCM-Primary (n=103)	-0.100877	-0.0872973	-0.0728209	-0.144001	0.457328	-0.0996108			SKCM-Primary (n=103)	0.489024	0.563	0.634175	0.291409	1.3449e-05	0.495384
	STAD (n=415)	-0.0161669	0.0456993	0.191061	0.0354498	0.415665	-0.0118458			STAD (n=415)	0.883054	0.559537	0.00114914	0.645438	4.60789e-16	0.903521
	TGCT (n=150)	0.0966715	0.0966715	0.173847	0.247408	-0.0114917	0.0993978			TGCT (n=150)	0.402051	0.402051	0.0935224	0.0109417	0.947728	0.388777
	THCA (n=509)	0.0563104	0.071504	-0.0702042	-0.107498	0.226785	-0.0669711			THCA (n=509)	0.373914	0.253761	0.263428	0.056602	4.48079e-06	0.278024
	THYM (n=120)	-0.0588238	-0.0579693	0.293505	0.0227618	0.123492	0.188273			THYM (n=120)	0.684006	0.686594	0.00695459	0.903521	0.342505	0.115309
	UCEC (n=545)	0.00979862	0.0131828	0.000532559	-0.0584906	0.351907	-0.0032686			UCEC (n=545)	0.968062	0.947728	0.996071	0.736138	0.00410669	0.984124
	UCS (n=57)	0.0296015	0.0325275	-0.0857753	0.298886	-0.2039	-0.0401304			UCS (n=57)	0.908788	0.903521	0.686594	0.0855361	0.282593	0.895135
	UVM (n=80)	-0.0853192	-0.0853192	0.343142	0.171974	0.11863	-0.0334241			UVM (n=80)	0.632734	0.632734	0.00995606	0.272967	0.478228	0.895135
